# Supplementary material
Source: PubMed Central journal article supplement (PMC5034329)
Supplement: bc6b00306_si_001.pdf [file bc6b00306_si_001.pdf]

# Supporting Information

## PET Imaging of Extracellular pH in Tumors with <sup>64</sup>Cu- and <sup>18</sup>F-Labeled pHLIP<sup>®</sup> Peptides: A Structure-Activity Optimization Study

Dustin Wayne Demoin,<sup>a</sup> Linden C. Wyatt,<sup>d</sup> Kimberly J. Edwards,<sup>a</sup> Dalya Abdel-Atti,<sup>a</sup> Mirkka Sarparanta,<sup>a</sup> Jacob Pourat,<sup>a</sup> Valerie A. Longo,<sup>c</sup> Sean D. Carlin,<sup>a,b</sup> Donald M. Engelman,<sup>e</sup> Oleg A. Andreev,<sup>d,e</sup> Yana K. Reshetnyak,<sup>d,e</sup> Nerissa Viola-Villegas,<sup>f</sup> and Jason S. Lewis<sup>\*,a,b,g</sup>

<sup>a</sup> Department of Radiology, <sup>b</sup> Program in Molecular Pharmacology, and <sup>c</sup> Small-Animal Imaging Core Facility, Memorial Sloan Kettering Cancer Center, 1275 York Avenue, New York, NY 10065, USA

<sup>d</sup> Physics Department, University of Rhode Island, 2 Lippitt Road, Kingston, RI 02881, USA

<sup>e</sup> pHLIP, Inc, 2 Lippitt Road, Kingston, RI 02881, USA

<sup>f</sup> Department of Oncology, Karmanos Cancer Institute, Detroit, MI 48201, USA

<sup>g</sup> Weill Cornell Medical College, 1300 York Avenue, New York, NY 10065, USA.

### Contents

|                                                           |     |
|-----------------------------------------------------------|-----|
| Methods & Materials .....                                 | S2  |
| Radiolabeling .....                                       | S2  |
| Labeling methods for <sup>64</sup> Cu-NOTA-pHLIP. ....    | S2  |
| Labeling methods for <sup>18</sup> F-AIF-NOTA-pHLIP. .... | S3  |
| Nonradioactive standards.....                             | S5  |
| General labeling methods for Cu-NOTA-pHLIP:.....          | S5  |
| General labeling methods for AIF-NOTA-pHLIP:.....         | S5  |
| Cell culture methods and in vivo models.....              | S5  |
| 4T1 cell culture. ....                                    | S5  |
| 4T1 orthotopic BALB/c mouse model.....                    | S6  |
| PC3 cell culture.....                                     | S6  |
| PC3 shoulder nude mouse xenografts.....                   | S7  |
| LNCaP cell culture.....                                   | S7  |
| LNCaP shoulder nude mouse xenografts.....                 | S7  |
| B16-F10 cell culture. ....                                | S8  |
| Orthotopic B16-F10 shoulder allografts. ....              | S8  |
| U-87 MG cell culture. ....                                | S8  |
| U-87 MG shoulder xenografts: .....                        | S9  |
| Supporting Information Figures.....                       | S10 |
| Fig. S1.....                                              | S10 |
| Fig. S2.....                                              | S11 |
| Fig. S3.....                                              | S12 |
| Fig. S4.....                                              | S12 |
| Fig. S5.....                                              | S13 |
| Fig. S6.....                                              | S13 |
| Fig. S7.....                                              | S14 |
| Fig. S8.....                                              | S15 |
| Supporting Information Tables .....                       | S16 |

|                                                                                                           |     |
|-----------------------------------------------------------------------------------------------------------|-----|
| Table S1.....                                                                                             | S16 |
| Data for each tracer from this study in female, BALB/c mice with orthotopic 4T1 breast cancer allografts: |     |
| .....                                                                                                     | S17 |
| <sup>64</sup> Cu-NOTA-WT.....                                                                             | S17 |
| <sup>64</sup> Cu-NOTA-Var3.....                                                                           | S19 |
| <sup>64</sup> Cu-NOTA-Var7.....                                                                           | S21 |
| <sup>18</sup> F-AIF-NOTA-WT.....                                                                          | S23 |
| <sup>18</sup> F-AIF-NOTA-Var3.....                                                                        | S25 |
| <sup>18</sup> F-AIF-NOTA-Var7.....                                                                        | S27 |
| <sup>64</sup> Cu-NO2A-cysWT.....                                                                          | S29 |
| <sup>64</sup> Cu-NO2A-cysVar7.....                                                                        | S32 |
| <sup>18</sup> F-AIF-NO2A-cysWT.....                                                                       | S35 |
| <sup>18</sup> F-AIF-NO2A-cysVar7.....                                                                     | S38 |
| <sup>64</sup> Cu-NO2A-cysVar3.....                                                                        | S41 |
| <sup>18</sup> F-AIF-NO2A-cysVar3.....                                                                     | S44 |
| Data from lead tracers in other tumor models:.....                                                        | S47 |
| <sup>64</sup> Cu-NO2A-cysVar3 in PC3 tumor-bearing male nude mice.....                                    | S47 |
| <sup>64</sup> Cu-NO2A-cysVar3 in LNCaP tumor-bearing male nude mice.....                                  | S48 |
| <sup>64</sup> Cu-NO2A-cysVar3 in B16-F10 tumor-bearing female C57Bl/6 mice.....                           | S49 |
| <sup>18</sup> F-AIF-NO2A-cysVar3 in PC3 tumor-bearing male nude mice.....                                 | S50 |
| <sup>18</sup> F-AIF-NO2A-cysVar3 in LNCaP tumor-bearing male nude mice.....                               | S51 |
| <sup>18</sup> F-AIF-NO2A-cysVar3 in B16-F10 tumor-bearing female C57Bl/6 mice.....                        | S52 |
| <sup>18</sup> F-AIF-NO2A-cysVar3 in U87MG tumor-bearing male nude mice.....                               | S53 |
| Supporting Information References.....                                                                    | S54 |

## Methods & Materials

### **Radiolabeling**

*Labeling methods for <sup>64</sup>Cu-NOTA-pHLIP.* Following a preparation similar to Zeglis *et al.*,<sup>1</sup> 3.13-11.26 mCi (116 – 417 MBq) of <sup>64</sup>Cu in 0.1 M HCl (2.5-6.0 μL, 1.86×10<sup>4</sup>-1.25×10<sup>4</sup> mCi/μmol, Washington University, St. Louis, MO) was added to 150 μL of 100 mM NH<sub>4</sub>OAc buffer (pH ~5.5). An aliquot (25-37 μL) of NOTA-pHLIP derivative (0.46-0.63 mM) in DMSO was added to the pH adjusted <sup>64</sup>Cu solution. The solution was placed on a thermomixer (Eppendorf, Hamberg, Germany) at 80 °C for 15 min at 1100 rpm. An aliquot of the crude product mixture was HPLC-analyzed (5-95 % acetonitrile in water (with 0.1 % trifluoroacetic acid) over 15 min, Jupiter C-18 column, Phenomenex, 250 mm × 4.6 mm, 5 μm, 300 Å) to ensure that product was present (<sup>64</sup>Cu-NOTA-pHLIP eluted at 10.3 min; <sup>64</sup>Cu-NO2A-cyspHLIP

eluted at 13.1 min). The remainder of the reaction mixture was separated using a pretreated Oasis HLB Plus Light or C18 Sep-Pak Light cartridge (Waters, Milford, MA). Free and unbound  $^{64}\text{Cu}$  was removed by washing the cartridge with 5 mL of water. The pure  $^{64}\text{Cu}$ -labeled NOTA-pHLIP derivatives were then eluted with 1 mL ethanol in 0.1 mL fractions. The ethanolic fractions with the highest activities were combined and diluted with sterile phosphate buffered saline (PBS) to provide < 10 % ethanol in the solution before HPLC analysis (Jupiter C-18, 5  $\mu\text{m}$ , 300 Å, 250  $\times$  4.6 mm, Phenomenex; 5-95 % AcN in water with 0.1 % TFA over 15 min at 1 mL/min) to ensure that no free  $^{64}\text{Cu}$  was present. The radiochemical purity of the species was always > 93 % and the specific activity (using the original amount of peptide added to the reaction mixture) was estimated to be 56.0-318.4  $\mu\text{Ci}/\text{nmol}$  (3.05-11.8 GBq/ $\mu\text{mol}$ ). The reaction yielded 1.29-9.54 mCi (47.7-353 MBq) of product with an isolated yield of 40.7-84.7 %.

*Labeling methods for  $^{18}\text{F}$ -AIF-NOTA-pHLIP.* Following a modified labeling method described by Dijkgraaf *et al.*,<sup>2</sup> 52.0-60.8 mCi (1.92-2.25 GBq) of  $^{18}\text{F}$  target water (produced from  $^{18}\text{O}$  enriched target water using a GEMS PETtrace-800 cyclotron, Memorial Sloan Kettering Cancer Center, New York, NY) was obtained. The target water was loaded onto a preconditioned chromafix cartridge (30-PS- $\text{HCO}_3$ , Advanced Biochemical Compounds (ABX), Germany). [All of the preconditioning solvents and the elution solution were prepared with metal-free water and trace-metal free reagents.] The  $^{18}\text{F}$  was eluted from the cartridge with approximately 100  $\mu\text{L}$  of 0.4 M  $\text{KHCO}_3$  in metal-free water into a 1.5 mL tube (ThermoFisher Scientific, Waltham, MA). The pH was adjusted to  $\sim$  4.1 with metal-free acetic acid (Sigma Aldrich). To the pH adjusted solution, 100  $\mu\text{L}$  of acetonitrile was added. If the total activity exceeded 50 mCi (1.85 GBq), the mixture was split between multiple 1.5 mL tubes prior to continuing ( $\sim$  10 mCi/40 nmol reaction). To the aliquotted mixture, 20  $\mu\text{L}$  (40 nmol) of 2 mM

$\text{AlCl}_3$  in 0.1 M  $\text{NH}_4\text{OAc}$  buffer (pH ~ 4.1) was added to each tube. The solution was allowed to react for 5 min at room temperature before 14-17  $\mu\text{L}$  of 4-5 mM NOTA-peptide in DMSO (68-75 nmol) was added, the tube capped, and the reaction mixture reacted at 75 °C for 15 minutes in a thermomixer. After reaction, the mixture was diluted with 2 mL of metal-free water. An aliquot of the reaction mixture was HPLC-analyzed (20-95 % acetonitrile in water (with 0.1 % trifluoroacetic acid) over 15 min with an Atlantis T3, Waters, 250 mm  $\times$  4.6 mm, 5  $\mu\text{m}$ ; Jupiter, Phenomenex, 250 mm  $\times$  4.6 mm, 5  $\mu\text{m}$ , 300 Å, column) to ensure that product was formed ( $^{18}\text{F}$ -AIF-NOTA-WT eluted between 10.1 and 12.1 min;  $^{18}\text{F}$ -AIF-NOTA-var3 eluted between 10.2 and 11.4 min;  $^{18}\text{F}$ -AIF-NOTA-var7 eluted between 8.2 and 10.3 min;  $^{18}\text{F}$ -AIF-NOTA-cysWT eluted between 13 and 16 min;  $^{18}\text{F}$ -AIF-NOTA-cysVar3 eluted between 12 and 15 min;  $^{18}\text{F}$ -AIF-NOTA-cysVar7 eluted between 12 and 14 min). While the HPLC analysis was being performed, the remainder of the reaction mixture was separated using a pretreated Oasis HLB Plus Light or C18 Sep-Pak Light cartridge (Waters, Milford, MA) eluting first with water (5 mL) to remove any unbound  $^{18}\text{F}$  species and then ethanol (0.1 mL fractions for 4 fractions and then 0.6 mL). The  $^{18}\text{F}$ -AIF-NOTA-pHLIP derivatives eluted within the first three fractions in ethanol. The ethanolic solution was diluted with sterile PBS to provide < 10 % ethanol in the solution before HPLC analysis (Jupiter C-18, 5  $\mu\text{m}$ , 300 Å, 250  $\times$  4.6 mm, Phenomenex; 5-95 % AcN in water with 0.1 % TFA over 15 min at 1 mL/min). The radiochemical purity of the species was always  $\geq$  95% and the specific activity (using the original amount of peptide added to the reaction mixture) was estimated to be 79.9-178.1  $\mu\text{Ci}/\mu\text{mol}$  (2.96-6.60 GBq/ $\mu\text{mol}$ ). The reaction yielded 6.02-9.24 mCi (223-342 MBq) with an overall, decay-corrected (to beginning of labeling procedure) isolated yield of 2.33-48.6 %.

### ***Nonradioactive standards***

*General labeling methods for Cu-NOTA-pHLIP:* Approximately 200  $\mu\text{L}$  of 36.4 M  $\text{Cu}(\text{OAc})_2$  in 0.1 M  $\text{NH}_4\text{OAc}$  (pH  $\sim$  5) in metal-free water was added to 5-6 mg of peptide in approximately 200  $\mu\text{L}$  of DMSO. The mixtures were reacted in a thermomixer at 50  $^\circ\text{C}$  for 1 h, and then filtered through a 0.2  $\mu\text{m}$  filter. The filter was washed with an additional 1 mL of 50% AcN in water and 2 mL of water, sequentially. The combined filtrate was HPLC purified (10-95% AcN in water over 30 min with a Jupiter C-18 column, 5  $\mu\text{m}$ , 300  $\text{Å}$ , 250  $\times$  4.6 mm, Phenomenex). The collected fraction (14.5-15.5 min for Cu-NOTA-WT, 13.9-15 min for Cu-NOTA-Var3, 13.2-14.1 min for Cu-NOTA-Var7, 12.2-13.5 min for Cu-NO2A-cysWT, 13-15.3 min for Cu-NO2A-cysVar3, and 12.5-16 min Cu-NO2A-cysVar7) was lyophilized.

*General labeling methods for AIF-NOTA-pHLIP:* Sodium fluoride (19.8 mg, 0.47 mmol) was dissolved in 150  $\mu\text{L}$  of 0.1 M  $\text{NH}_4\text{OAc}$  in metal-free water (pH  $\sim$  4.1). The resulting solution was added to 13.7 mg  $\text{AlCl}_3$  (0.057 mmol) with 50  $\mu\text{L}$  of 0.1 M  $\text{NH}_4\text{OAc}$  buffer (pH  $\sim$  4.1). The  $\text{AlF}_3$  solution (60  $\mu\text{L}$ ) was added to approximately 7 mg of peptide dissolved in 60  $\mu\text{L}$  of EtOH. The reaction mixtures were reacted at 50  $^\circ\text{C}$  on a thermomixer for 1 h before being HPLC purified (10-95% AcN in water over 30 min with a Jupiter column, 5  $\mu\text{m}$ , 300  $\text{Å}$ , 250  $\times$  4.6 mm, Phenomenex). The collected fraction (14.7-16.5 min for AIF-NOTA-WT, 13.8-15.4 min for AIF-NOTA-Var3, 13-14.6 min for AIF-NOTA-Var7, 12.5-17.5 min for AIF-NO2A-cysWT and AIF-NO2A-cysVar3, and 12-16 min AIF-NO2A-cysVar7) was lyophilized.

### ***Cell culture methods and in vivo models***

*4T1 cell culture.* The 4T1 cells, derived from spontaneous breast tumor in a BALB/c mouse, were provided by Fred Miller (Karmanos Cancer Institute, Detroit, MI) and cultured in Dulbecco's modified Eagle's high glucose media with 10 % FCS, 2 mM L-glutamine, penicillin, and streptomycin or from ATCC (Manassas, VA) and cultured in RPMI-1640 medium modified

to contain 2 mM L-glutamine, 10 mM HEPES, 1 mM sodium pyruvate, 4.5 g/L glucose, 1.5 g/L NaHCO<sub>3</sub>, penicillin, and streptomycin.

*4T1 orthotopic BALB/c mouse model.* The cells were removed from the flasks, concentrated, and resuspended in minimal media for cell counting. The cells were then diluted to contain approximately 1 million cells in 30  $\mu$ L of media (for orthotopic allografts). Following an MSKCC Institutional Animal Care and Use Committee approved protocol, 8-10 week old BALB/c mice (Charles River Laboratories, Wilmington, MA) were surgically implanted with one million 4T1 cancer cells into the first or the last mammary fat pad of the right side of the animal using aseptic surgical techniques and sterile staple closures while the mice were under anesthetic. Additionally, mice were given injections of meloxicam (24 h pain killer) in the scruff and bupivacaine intradermally prior to surgical incisions. One day post surgery, the mice were again given meloxicam and checked to ensure that the closure was healing. Two and three days post surgery, the mice were checked to ensure that the animals were healthy and recovering well from the surgery. Five to seven days post surgery, the staples were removed. Five to nine days post surgery, the mice were injected with 50-75  $\mu$ Ci (0.9-0.4 nmol) of the respective radiopharmaceutical for *in vivo* biodistribution or 500-600  $\mu$ Ci (9-11 nmol) for *in vivo* imaging. The mice receiving <sup>64</sup>Cu-NOTA-PHLIP were sacrificed at 1, 2, 4, 12, 24, 36, and 48 h; the mice receiving <sup>18</sup>F-AIF-NOTA-PHLIP were sacrificed at 0.5, 1, 2, 4, 6 and 8 h.

*PC3 cell culture.* The PC3 cells, prostate cancer derived from a human bone metastasis, were purchased from ATCC (Manassas, VA) and cultured in F-12K Medium (Kaighn's Modification of Ham's F-12 Medium) with, 10% FCS, 2 mM L-glutamine, 1.5 g/L NaHCO<sub>3</sub>, penicillin, and streptomycin.

*PC3 shoulder nude mouse xenografts.* The cells were removed from the flasks, concentrated, and resuspended in minimal media for cell counting. The cells were then diluted to contain approximately 3 million cells in 150  $\mu$ L of 1:1 media and matrigel (for shoulder xenografts). Following an MSKCC Institutional Animal Care and Use Committee approved protocol, 150  $\mu$ L of the cell suspension was injected subcutaneously in 6-9 week old nude male mice (CRL). Mice were used in studies at 3 weeks post inoculation. The mice were injected with 50-75  $\mu$ Ci (0.9-0.4 nmol) of the respective radiopharmaceutical for *in vivo* biodistribution or 500-600  $\mu$ Ci (9-11 nmol) for *in vivo* imaging. The mice receiving  $^{64}\text{Cu}$ -NOTA-cysVar3 were sacrificed at 1, 4, 12, 24, and 48 h; the mice receiving  $^{18}\text{F}$ -AIF-NOTA-cysVar3 were sacrificed at 1, 4, 6 and 8 h.

*LNCaP cell culture.* The LNCaP cells, prostate cancer derived from a human supraclavicular lymph node metastasis, were purchased from ATCC (Manassas, VA) and cultured in RPMI-1640 medium modified to contain 2 mM L-glutamine, 10 mM HEPES, 1 mM sodium pyruvate, 4.5 g/L glucose, and 1.5 g/L  $\text{NaHCO}_3$ , penicillin, and streptomycin.

*LNCaP shoulder nude mouse xenografts.* The cells were removed from the flasks, concentrated, and resuspended in minimal media for cell counting. The cells were then diluted to contain approximately 3-6 million cells in 150  $\mu$ L of 1:1 media and matrigel (or shoulder xenografts). Following an MSKCC Institutional Animal Care and Use Committee approved protocol, 150  $\mu$ L of the cell suspension was injected subcutaneously in 6-8 week old nude male mice (CRL). Mice were used in studies at 3-8 weeks post inoculation. The mice were injected with 50-75  $\mu$ Ci (0.9-0.4 nmol) of the respective radiopharmaceutical for *in vivo* biodistribution or 500-600  $\mu$ Ci (9-11 nmol) for *in vivo* imaging. The mice receiving  $^{64}\text{Cu}$ -NOTA-cysVar3 were

sacrificed at 1, 4, 12, 24, and 48 h; the mice receiving  $^{18}\text{F}$ -AIF-NOTA-cysVar3 were sacrificed at 1, 4, 6 and 8 h.

*B16-F10 cell culture.* The B16-F10 cells, derived from spontaneous melanoma in a C57Bl/6 mouse, were purchased from ATCC (Manassas, VA) and cultured in Dubelco's modified Eagle's high glucose media with 10 % FCS, 4 mM L-glutamine, 1 mM sodium pyruvate, 1.5 g/L  $\text{NaHCO}_3$ , penicillin, and streptomycin.

*Orthotopic B16-F10 shoulder allografts.* The cells were removed from the flasks, concentrated, and resuspended in minimal media for cell counting. The cells were then diluted to contain approximately 100,000 cells in 100  $\mu\text{L}$  of media (for shoulder allografts). Following an MSKCC Institutional Animal Care and Use Committee approved protocol, C57Bl/6 female mice (CRL) and BALB/c female mice (CRL) were injected with 100  $\mu\text{L}$  of the cell suspension intradermally as per a media substituted protocol from Overwijk & Restifo (Current Protocols in Immunology, 2000: 20.1.1-20.1.29). The mice were used in studies at approximately 9-14 days post inoculation. The mice were injected with 50-75  $\mu\text{Ci}$  (0.9-0.4 nmol) of the respective radiopharmaceutical for *in vivo* biodistribution or 500-600  $\mu\text{Ci}$  (9-11 nmol) for *in vivo* imaging. The mice receiving  $^{64}\text{Cu}$ -NOTA-cysVar3 were sacrificed at 1, 4, 12, 14.5, and 24 h; the mice receiving  $^{18}\text{F}$ -AIF-NOTA-cysVar3 were sacrificed at 1, 4, 6 and 8 h.

*U-87 MG cell culture.* The human glioblastoma cell line, U-87 MG, was purchased from American Type Culture Collection (ATCC, Manassas, VA) and cultured in Dulbecco's Modified Eagle's Medium with 10% fetal bovine serum, 2mM L-Glutamine, 1500mg/L Sodium Bicarbonate, 100 units/mL penicillin G and 100  $\mu\text{g}/\text{mL}$  streptomycin (prepared by the MSKCC Media Preparation Core).



*U-87 MG shoulder xenografts:* The cells were removed from the flasks, concentrated, and resuspended in minimal media for cell counting. The cells were then diluted to contain approximately 1 million cells in 150  $\mu$ L of 1:1 media and matrigel (or shoulder xenografts). Following an MSKCC Institutional Animal Care and Use Committee approved protocol, 150  $\mu$ L of the cell suspension was injected subcutaneously in 12 week old nude male mice (CRL). Mice were used in studies at 2-3 weeks post inoculation. The mice were injected with 400-500  $\mu$ Ci (7-10 nmol) for in vivo imaging. The mice were sacrificed at 6 h after imaging (n=6).

## Supporting Information Figures

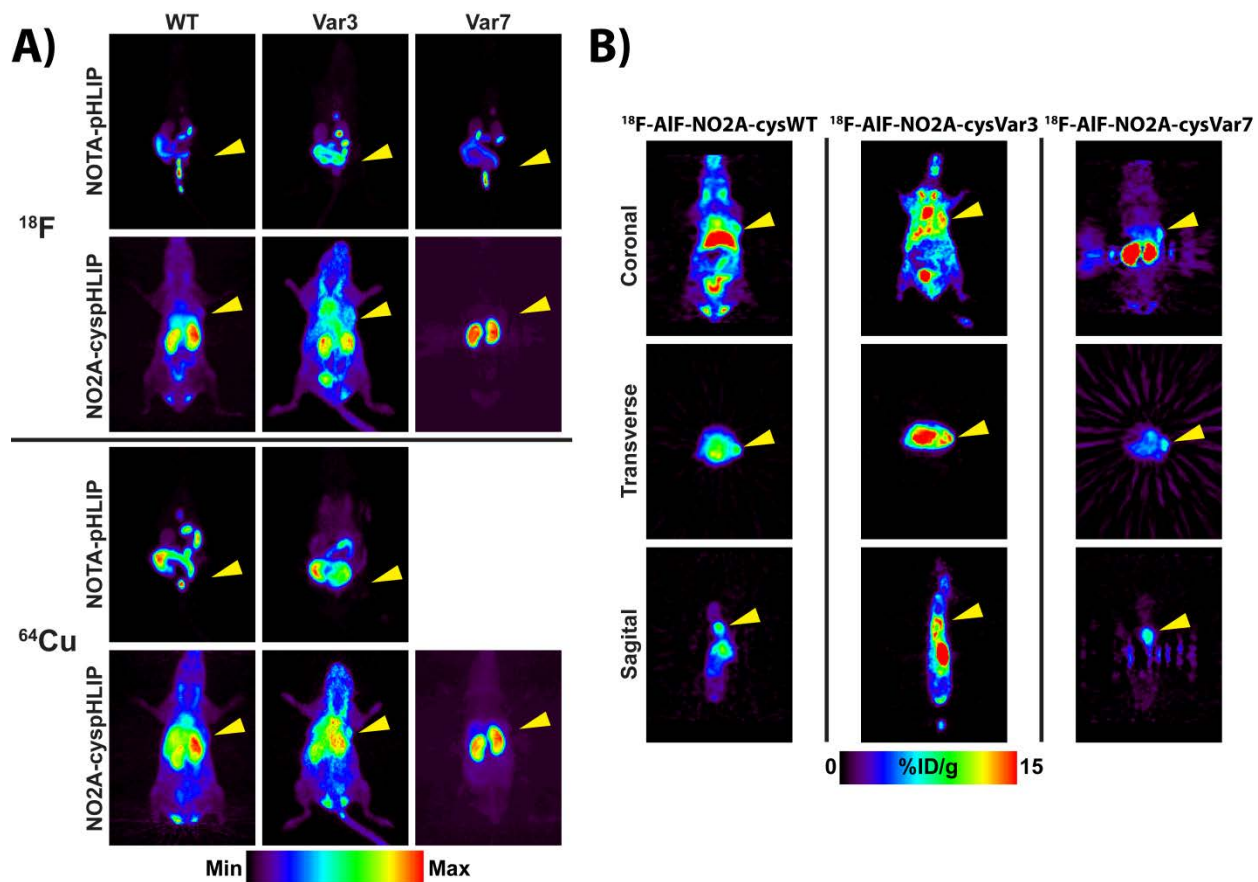

**Fig. S1.** PET Maximum intensity projection (MIP) showing differences in the tracer distribution at 4 h p.i. for all 12 tracers (A) and the PET imaging slices at 15 %ID/g at 4 h p.i. for the  $^{18}\text{F}$ -AIF-cyspHLIP constructs (V) in BALB/c female mice bearing 4T1 tumor allografts. The yellow arrowheads indicate where the tumor is located in the mouse. The MIPs correspond to the same images shown in **Fig. 3**. The slices are the same as those shown in **Fig. 3**, just at 15 %ID/g. Only *ex vivo* biodistribution data was obtained for  $^{64}\text{Cu}$ -NOTA-Var7.

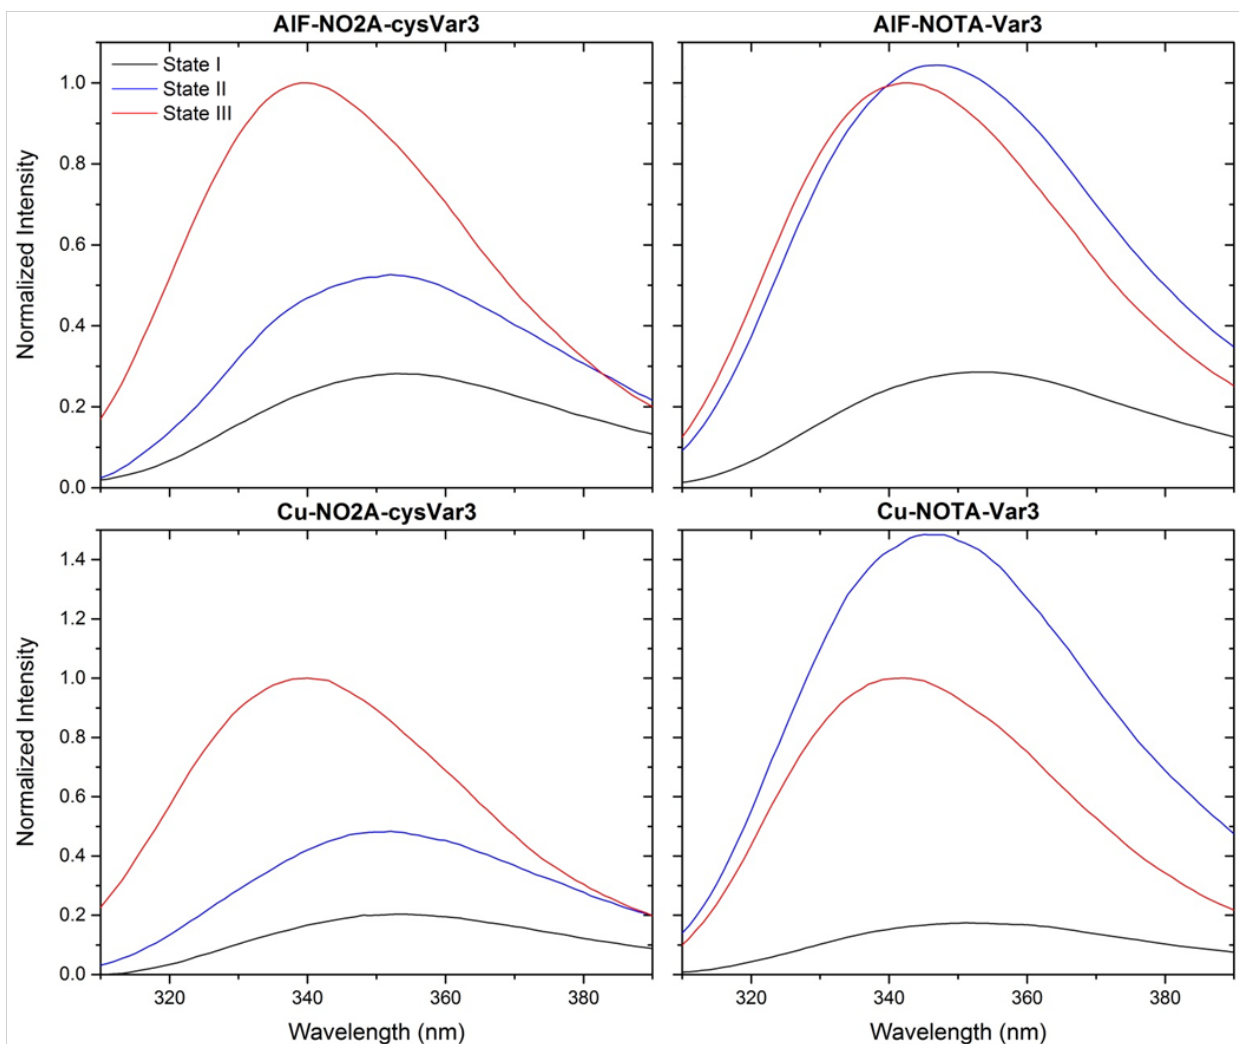

**Fig. S2.** Three states of NO2A-cysVar3 and NOTA-Var3 constructs. The constructs were examined under varying conditions for the presence of the three states of pHLIP<sup>®</sup> peptide: State I is the construct in solution at pH 8 (black lines), State II is the construct in the presence of POPC liposomes at pH 8 (blue lines), and State III is the construct folded and inserted in the lipid membrane when the pH is dropped from pH 8 to pH 4 by the addition of an aliquot of HCl (red lines). The concentrations of construct and lipids were 5  $\mu$ M and 1 mM, respectively.

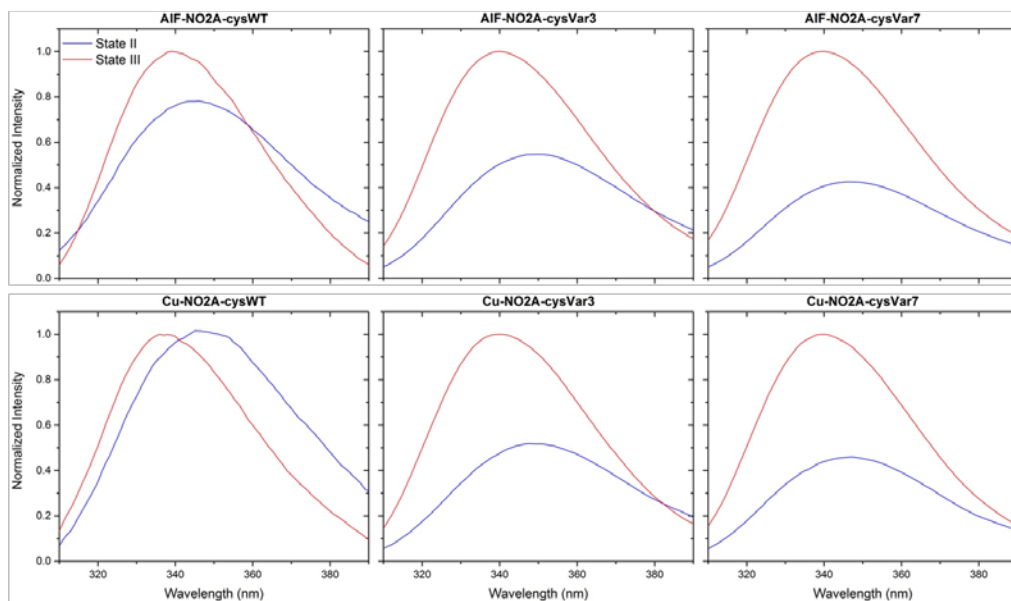

**Fig. S3.** State II and State III of NO2A-cyspHLIP constructs. The constructs were examined in the presence of liposomes under varying pH levels: State II is the construct in the presence of POPC liposomes at pH 8 (blue lines), State III is the construct folded and inserted in the lipid membrane when the pH is dropped from pH 8 to pH 4 by the addition of an aliquot of HCl (red lines). The concentrations of construct and lipids were 5  $\mu$ M and 1 mM, respectively, with physiological levels of free magnesium and calcium ions (0.65 mM and 1.25 mM, respectively).

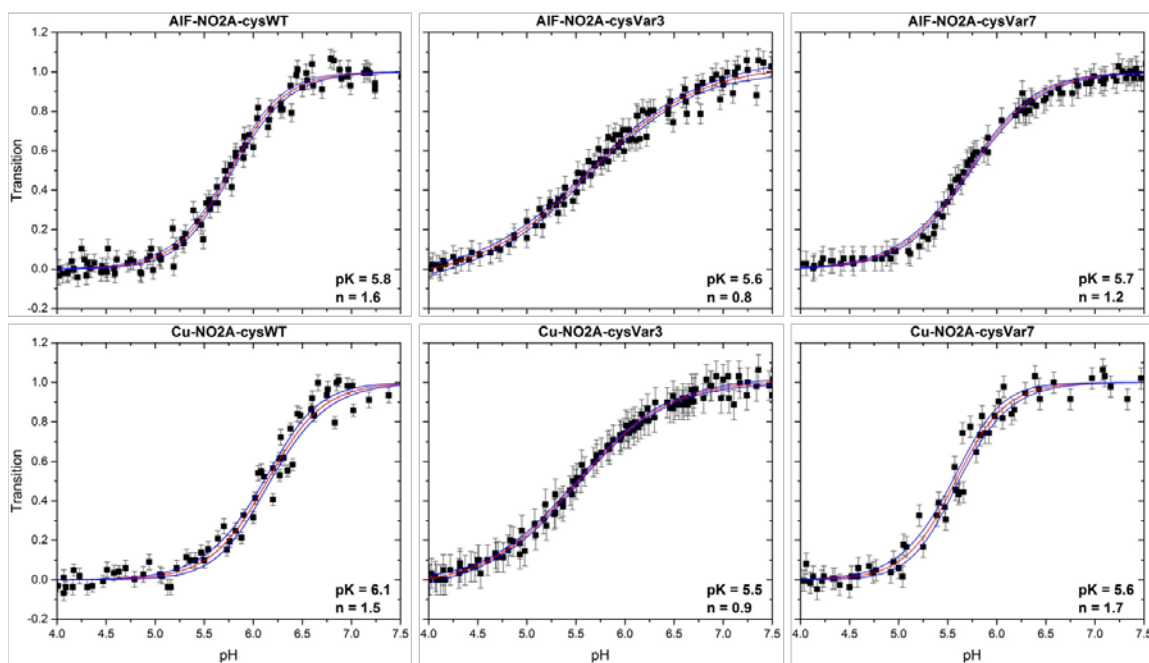

**Fig. S4.** pH dependent bilayer insertion of constructs. Changes in intrinsic construct fluorescence are used to measure the insertion of the construct population as a function of pH (transition from State II, at high pH, to State III, at low pH). Amount of construct population in State II is measured on the y-axis. The red and blue lines are fitting curves and 95% confidence intervals, respectively. These experiments were carried out with physiological levels of free magnesium and calcium ions (0.65 mM and 1.25 mM, respectively).

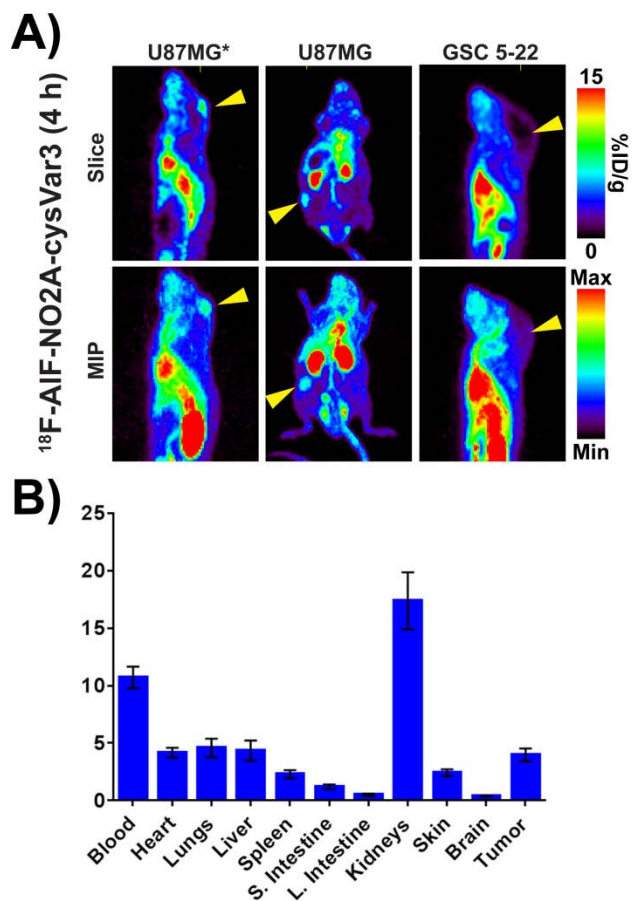

**Fig. S5.** Initial results from brain tumor uptake study. Images of the uptake of U87MG tumors xenografted in the skull (U87MG\*) or flank (U87MG) on male nude mice and GSC 5-22 tumors orthotopically xenografted behind an intact BBB in IRC-SCID male mice at 4 h post injection (A). The U87MG\* tumors did not infiltrate the brain and only the portion of the tumor that was in the skull bone and protruding from the skull showed uptake. The construct biodistribution of six male nude mice with flank U87MG xenografted tumors (B). The yellow arrowheads in (A) indicate where the tumor is located in the mouse.

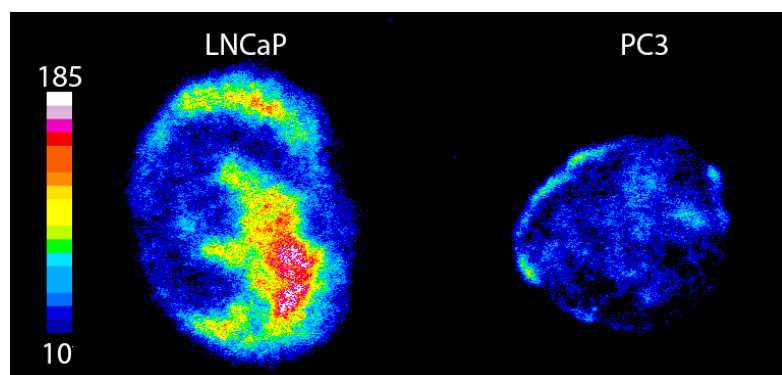

**Fig. S6.** Relative autoradiography of tumor slices from text Fig. 6. The slices show the overall difference in uptake of the tracer at 24 h p.i. Both of the slices were on the same autoradiography plate and, therefore, are relative to each other.

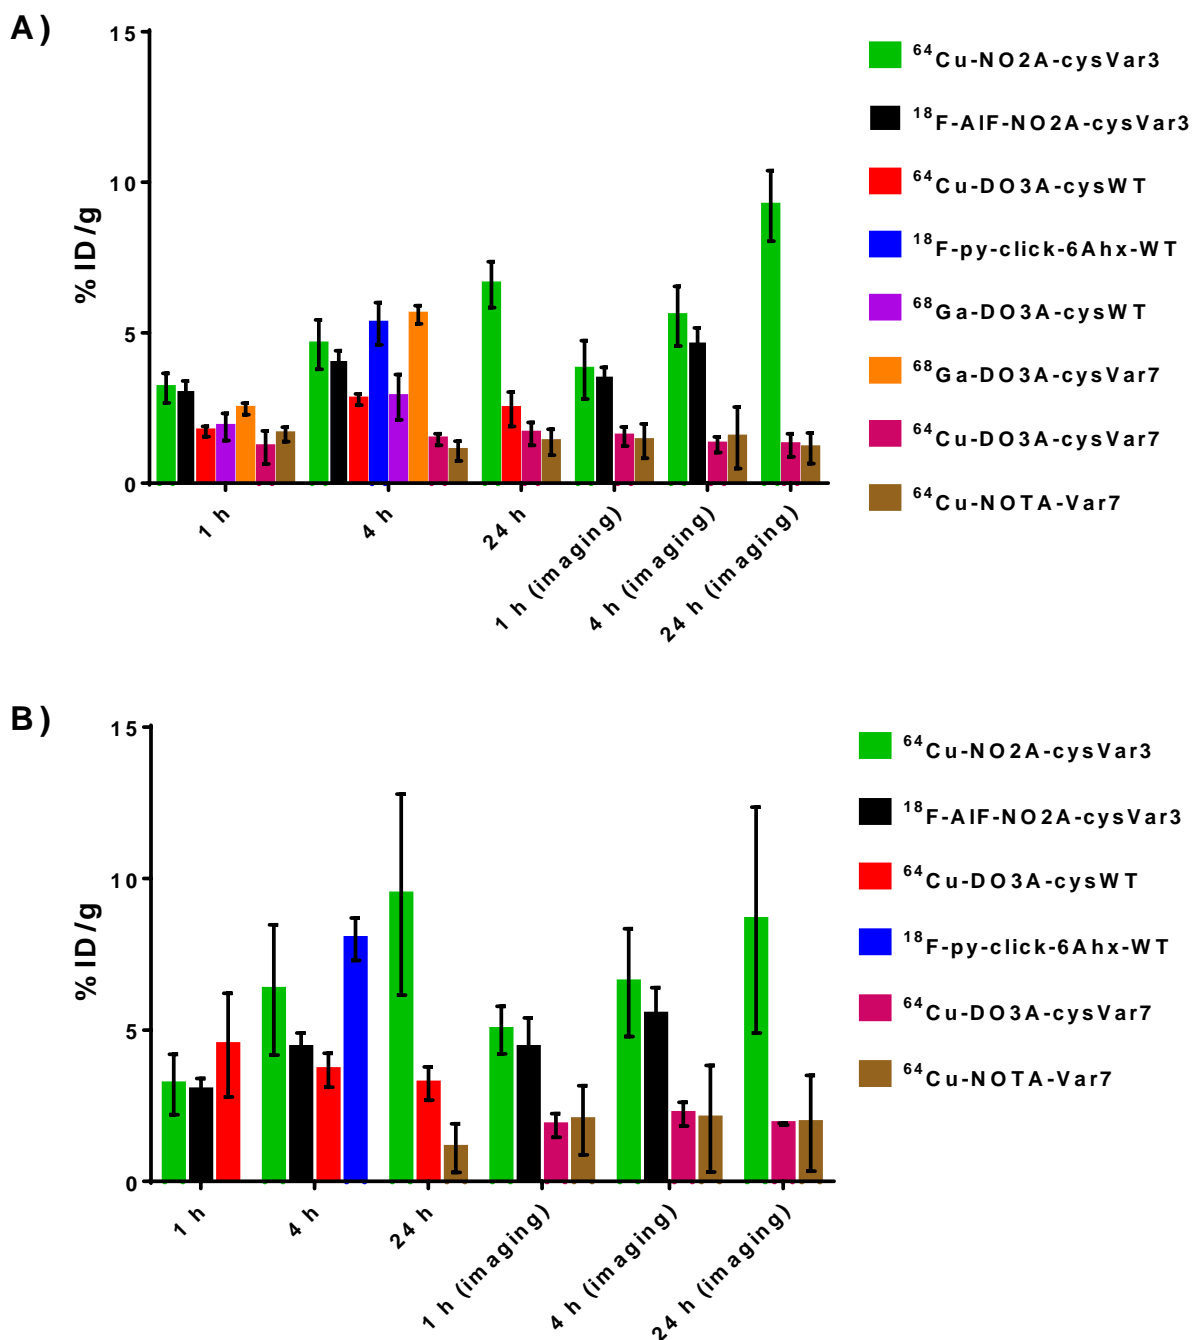

**Fig. S7.** Comparison of tumor uptake to previously reported studies for A) PC3 and B) LNCaP tumor bearing nude male mice at 1, 4, and 24 h with *ex vivo* biodistribution and *in vivo* imaging values. For imaging time points, ROIs were drawn on the coronal, sagittal, and transverse slices and the middle median value was tabulated for each mouse, the average of the four mice are shown with the standard deviation. Values from previous studies were used as reported.<sup>3</sup>

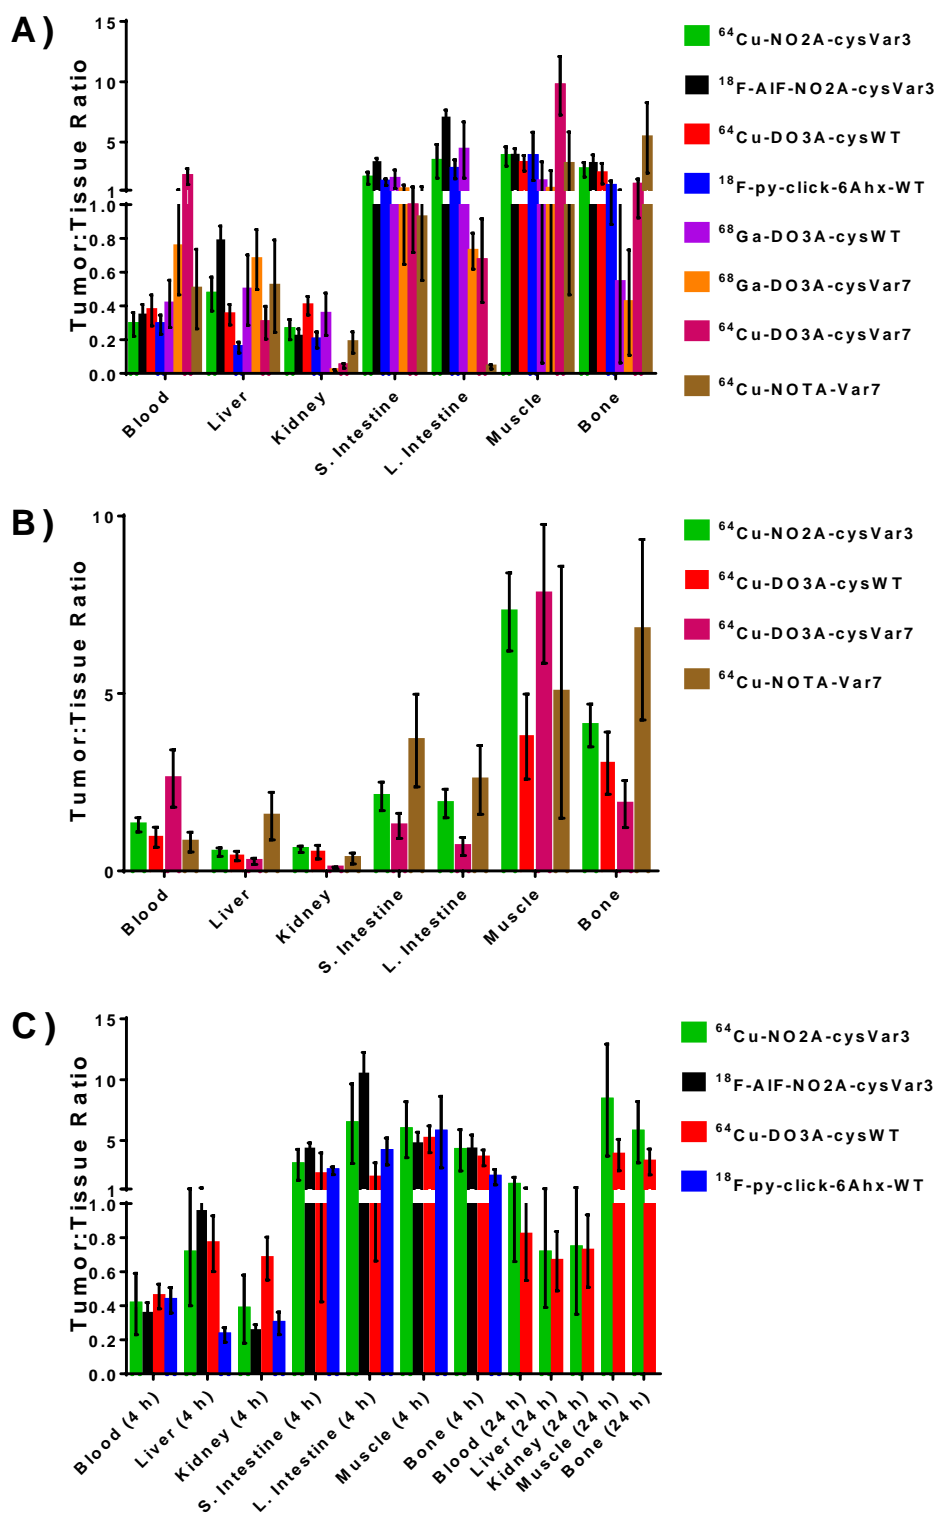

**Fig. S8.** Comparison of tumor:tissue ratios at 4 h and 24 h to previous studies: A) PC3 at 4 h; B) PC3 at 24 h; C) LNCaP at 4 and 24 h.

## Supporting Information Tables

**Table S1.** General specific activities of tracers produced for this study.

| Imaging Agent                    | Specific Activity<br>( $\mu\text{Ci/nmol}$ ) <sup>a</sup> | Specific Activity<br>( $\mu\text{Ci/nmol}$ ) <sup>b</sup> |
|----------------------------------|-----------------------------------------------------------|-----------------------------------------------------------|
| <sup>64</sup> Cu-NOTA-Var7       | 82.4                                                      | N/A                                                       |
| <sup>18</sup> F-AIF-NOTA-Var7    | 79.9                                                      | N/A                                                       |
| <sup>64</sup> Cu-NOTA-Var3       | 132.8 <sup>c</sup>                                        | N/A                                                       |
| <sup>18</sup> F-AIF-NOTA-Var3    | 101.3                                                     | N/A                                                       |
| <sup>64</sup> Cu-NOTA-WT         | 116.4                                                     | N/A                                                       |
| <sup>18</sup> F-AIF-NOTA-WT      | 135.9                                                     | N/A                                                       |
| <sup>64</sup> Cu-NO2A-cysVar7    | 113.7                                                     | 219.6                                                     |
| <sup>18</sup> F-AIF-NO2A-cysVar7 | 55.9                                                      | 178.1                                                     |
| <sup>64</sup> Cu-NO2A-cysVar3    | 45.5-523.3                                                | 47.5-340.2                                                |
| <sup>18</sup> F-AIF-NO2A-cysVar3 | 31.2-84.2                                                 | 38.9-351.4                                                |
| <sup>64</sup> Cu-NO2A-cysWT      | 215.6                                                     | 99.1                                                      |
| <sup>18</sup> F-AIF-NO2A-cysWT   | 19.6                                                      | N/A                                                       |

<sup>a</sup> Approximated from the amount of total peptide added.

<sup>b</sup> Calculated from the UV/vis standard concentration curve.

<sup>c</sup> In a separate experiment, a specific activity of 1656  $\mu\text{Ci/nmol}$  was attained, but the lower specific activity material was used in the studies in order to be comparable throughout.



**Data for each tracer from this study in female, BALB/c mice with orthotopic 4T1 breast cancer allografts:**

**<sup>64</sup>Cu-NOTA-WT**

Table S1-1. Tissue uptake (mean %ID ± SD) of <sup>64</sup>Cu-NOTA-WT administered via the lateral tail vein in female, BALB/c mice with orthotopic 4T1 breast cancer allografts implanted into the mammary fat pad.

| Tissue       | 1 h (n = 4) |         | 2 h (n = 4) |         | 4 h (n = 4) |         | 12 h (n = 4) |         | 24 h (n = 3) |         |
|--------------|-------------|---------|-------------|---------|-------------|---------|--------------|---------|--------------|---------|
| Blood        | 0.585       | ± 0.291 | 0.413       | ± 0.265 | 0.172       | ± 0.047 | 0.533        | ± 0.118 | 0.288        | ± 0.119 |
| Heart        | 0.057       | ± 0.006 | 0.046       | ± 0.006 | 0.048       | ± 0.009 | 0.059        | ± 0.009 | 0.040        | ± 0.005 |
| Lungs        | 0.359       | ± 0.043 | 0.364       | ± 0.049 | 0.314       | ± 0.041 | 0.340        | ± 0.074 | 0.236        | ± 0.006 |
| Liver        | 1.185       | ± 0.298 | 0.991       | ± 0.219 | 0.822       | ± 0.150 | 0.858        | ± 0.166 | 0.645        | ± 0.024 |
| Spleen       | 0.049       | ± 0.009 | 0.039       | ± 0.005 | 0.047       | ± 0.007 | 0.052        | ± 0.008 | 0.038        | ± 0.004 |
| Pancreas     | 0.041       | ± 0.015 | 0.032       | ± 0.005 | 0.044       | ± 0.019 | 0.037        | ± 0.006 | 0.031        | ± 0.005 |
| Stomach      | 0.282       | ± 0.244 | 0.104       | ± 0.028 | 0.121       | ± 0.043 | 0.109        | ± 0.019 | 0.074        | ± 0.003 |
| S. intestine | 12.043      | ± 2.341 | 1.684       | ± 0.580 | 0.444       | ± 0.050 | 0.376        | ± 0.021 | 0.280        | ± 0.010 |
| L. intestine | 2.486       | ± 2.911 | 14.250      | ± 1.086 | 8.510       | ± 3.356 | 0.540        | ± 0.138 | 0.291        | ± 0.054 |
| Kidneys      | 2.213       | ± 0.110 | 1.849       | ± 0.136 | 1.739       | ± 0.183 | 1.434        | ± 0.050 | 1.107        | ± 0.094 |
| Muscle       | 0.020       | ± 0.005 | 0.017       | ± 0.004 | 0.017       | ± 0.004 | 0.018        | ± 0.004 | 0.012        | ± 0.004 |
| Bone         | 0.012       | ± 0.008 | 0.012       | ± 0.004 | 0.014       | ± 0.004 | 0.026        | ± 0.015 | 0.012        | ± 0.003 |
| Skin         | 0.070       | ± 0.023 | 0.080       | ± 0.022 | 0.054       | ± 0.007 | 0.095        | ± 0.013 | 0.074        | ± 0.012 |
| Brain        | 0.033       | ± 0.008 | 0.026       | ± 0.005 | 0.022       | ± 0.003 | 0.023        | ± 0.001 | 0.017        | ± 0.001 |
| Tumor        | 0.101       | ± 0.019 | 0.101       | ± 0.012 | 0.136       | ± 0.027 | 0.192        | ± 0.071 | 0.198        | ± 0.025 |

Table S1-2. Tissue uptake (mean %ID/g ± SD) of <sup>64</sup>Cu-NOTA-WT administered via the lateral tail vein in female, BALB/c mice with orthotopic 4T1 breast cancer allografts implanted into the mammary fat pad.

| Tissue                                  | 1 h (n = 4) |         | 2 h (n = 4) |         | 4 h (n = 4) |         | 12 h (n = 4) |         | 24 h (n = 3) |         |
|-----------------------------------------|-------------|---------|-------------|---------|-------------|---------|--------------|---------|--------------|---------|
| Blood                                   | 1.529       | ± 0.164 | 1.223       | ± 0.255 | 1.192       | ± 0.263 | 1.241        | ± 0.225 | 0.862        | ± 0.097 |
| Heart                                   | 0.589       | ± 0.061 | 0.476       | ± 0.051 | 0.495       | ± 0.042 | 0.519        | ± 0.099 | 0.364        | ± 0.036 |
| Lungs                                   | 1.773       | ± 0.161 | 1.470       | ± 0.090 | 1.414       | ± 0.083 | 1.252        | ± 0.231 | 0.886        | ± 0.106 |
| Liver                                   | 1.496       | ± 0.379 | 1.161       | ± 0.231 | 0.904       | ± 0.097 | 0.816        | ± 0.180 | 0.637        | ± 0.063 |
| Spleen                                  | 0.348       | ± 0.045 | 0.308       | ± 0.021 | 0.318       | ± 0.023 | 0.342        | ± 0.050 | 0.272        | ± 0.017 |
| Pancreas                                | 0.267       | ± 0.082 | 0.223       | ± 0.027 | 0.261       | ± 0.066 | 0.266        | ± 0.091 | 0.188        | ± 0.031 |
| Stomach                                 | 0.551       | ± 0.264 | 0.352       | ± 0.085 | 0.282       | ± 0.080 | 0.302        | ± 0.055 | 0.170        | ± 0.023 |
| S. intestine                            | 11.075      | ± 3.605 | 1.410       | ± 0.447 | 0.391       | ± 0.082 | 0.301        | ± 0.026 | 0.198        | ± 0.023 |
| L. intestine                            | 4.140       | ± 4.791 | 20.733      | ± 1.782 | 9.956       | ± 3.415 | 0.648        | ± 0.192 | 0.291        | ± 0.063 |
| Kidneys                                 | 8.326       | ± 1.158 | 7.156       | ± 0.725 | 6.232       | ± 0.613 | 4.974        | ± 0.766 | 3.527        | ± 0.943 |
| Muscle                                  | 0.191       | ± 0.026 | 0.164       | ± 0.026 | 0.166       | ± 0.008 | 0.160        | ± 0.019 | 0.124        | ± 0.028 |
| Bone                                    | 0.251       | ± 0.063 | 0.234       | ± 0.089 | 0.274       | ± 0.051 | 0.348        | ± 0.063 | 0.269        | ± 0.042 |
| Skin                                    | 0.700       | ± 0.072 | 0.679       | ± 0.102 | 0.715       | ± 0.109 | 0.766        | ± 0.116 | 0.512        | ± 0.062 |
| Brain                                   | 0.092       | ± 0.012 | 0.069       | ± 0.008 | 0.054       | ± 0.002 | 0.057        | ± 0.007 | 0.046        | ± 0.003 |
| Tumor                                   | 0.577       | ± 0.074 | 0.574       | ± 0.108 | 0.679       | ± 0.025 | 0.904        | ± 0.144 | 0.845        | ± 0.127 |
| <b>Tumor-to-tissue ratios (rel. u.)</b> |             |         |             |         |             |         |              |         |              |         |
| Tumor/blood                             | 0.377       | ± 0.063 | 0.470       | ± 0.132 | 0.569       | ± 0.127 | 0.729        | ± 0.176 | 0.980        | ± 0.184 |
| Tumor/liver                             | 0.386       | ± 0.110 | 0.494       | ± 0.135 | 0.751       | ± 0.085 | 1.108        | ± 0.301 | 1.327        | ± 0.239 |
| Tumor/S. I.                             | 0.052       | ± 0.018 | 0.407       | ± 0.150 | 1.737       | ± 0.370 | 3.008        | ± 0.543 | 4.264        | ± 0.804 |
| Tumor/L. I.                             | 0.139       | ± 0.162 | 0.028       | ± 0.006 | 0.068       | ± 0.024 | 1.395        | ± 0.469 | 2.904        | ± 0.767 |
| Tumor/kidney                            | 0.069       | ± 0.013 | 0.080       | ± 0.017 | 0.109       | ± 0.011 | 0.182        | ± 0.040 | 0.240        | ± 0.073 |
| Tumor/muscle                            | 3.029       | ± 0.565 | 3.509       | ± 0.869 | 4.099       | ± 0.255 | 5.665        | ± 1.130 | 6.794        | ± 1.832 |
| Tumor/bone                              | 2.301       | ± 0.651 | 2.457       | ± 1.048 | 2.473       | ± 0.471 | 2.601        | ± 0.626 | 3.146        | ± 0.682 |

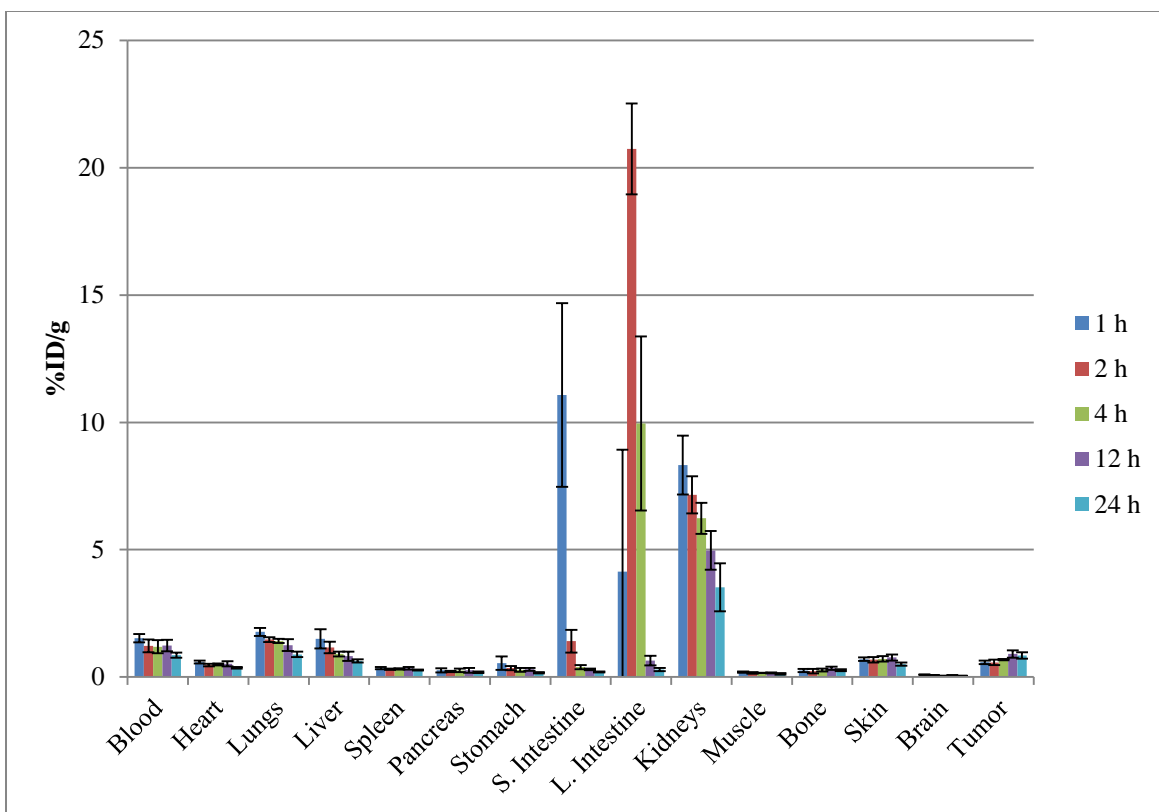

Fig. S1-1. Tissue uptake (mean %ID/g  $\pm$  SD) of  $^{64}\text{Cu}$ -NOTA-WT (n = 4 (3 at 24 h)) administered via the lateral tail vein in female, BALB/c mice with orthotopic 4T1 breast cancer allografts implanted into the mammary fat pad full graph from text.

HPLC Chromatogram of the Reconstituted  $^{64}\text{Cu}$ -NOTA-WT Injectate

**BIOSCAN**

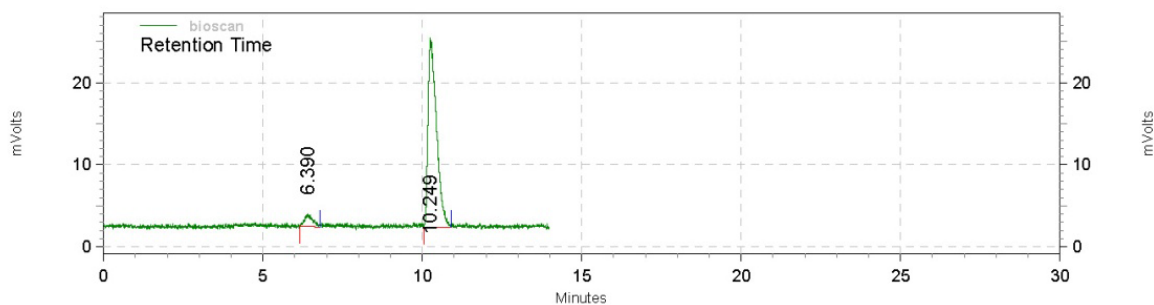

**bioscan Results**

| Retention Time | Area          | Area %        | Height       | Height %      |
|----------------|---------------|---------------|--------------|---------------|
| 6.390          | 25927         | 5.77          | 1475         | 6.01          |
| 10.249         | 423382        | 94.23         | 23073        | 93.99         |
| <b>Totals</b>  | <b>449309</b> | <b>100.00</b> | <b>24548</b> | <b>100.00</b> |

<sup>64</sup>Cu-NOTA-Var3

Table S2-1. Tissue uptake (mean %ID ± SD) of <sup>64</sup>Cu-NOTA-var3 administered via the lateral tail vein in female, BALB/c mice with orthotopic 4T1 breast cancer allografts implanted into the mammary fat pad.

| Tissue       | 1 h (n = 5)    | 2 h (n = 5)    | 4 h (n = 5)   | 12 h (n = 5)  | 24 h (n = 4)  |
|--------------|----------------|----------------|---------------|---------------|---------------|
| Blood        | 0.288 ± 0.059  | 0.271 ± 0.185  | 0.225 ± 0.122 | 0.232 ± 0.048 | 0.479 ± 0.214 |
| Heart        | 0.057 ± 0.014  | 0.052 ± 0.007  | 0.047 ± 0.009 | 0.039 ± 0.004 | 0.041 ± 0.012 |
| Lungs        | 0.420 ± 0.047  | 0.458 ± 0.058  | 0.388 ± 0.073 | 0.303 ± 0.067 | 0.276 ± 0.044 |
| Liver        | 1.093 ± 0.224  | 0.892 ± 0.188  | 0.808 ± 0.081 | 0.713 ± 0.042 | 0.647 ± 0.140 |
| Spleen       | 0.047 ± 0.008  | 0.048 ± 0.005  | 0.045 ± 0.002 | 0.050 ± 0.010 | 0.045 ± 0.006 |
| Pancreas     | 0.052 ± 0.015  | 0.044 ± 0.021  | 0.045 ± 0.011 | 0.037 ± 0.009 | 0.041 ± 0.023 |
| Stomach      | 0.092 ± 0.018  | 0.119 ± 0.041  | 0.111 ± 0.013 | 0.115 ± 0.025 | 0.096 ± 0.046 |
| S. intestine | 17.226 ± 2.329 | 1.364 ± 0.327  | 0.394 ± 0.075 | 0.335 ± 0.029 | 0.322 ± 0.063 |
| L. intestine | 1.859 ± 0.941  | 18.364 ± 3.419 | 5.350 ± 3.021 | 0.514 ± 0.128 | 0.342 ± 0.026 |
| Kidneys      | 2.591 ± 0.170  | 2.141 ± 0.203  | 1.955 ± 0.280 | 1.454 ± 0.097 | 1.266 ± 0.178 |
| Muscle       | 0.017 ± 0.007  | 0.020 ± 0.004  | 0.018 ± 0.001 | 0.014 ± 0.003 | 0.016 ± 0.006 |
| Bone         | 0.016 ± 0.015  | 0.011 ± 0.006  | 0.022 ± 0.009 | 0.020 ± 0.008 | 0.008 ± 0.006 |
| Skin         | 0.055 ± 0.016  | 0.062 ± 0.009  | 0.060 ± 0.013 | 0.056 ± 0.018 | 0.062 ± 0.016 |
| Brain        | 0.033 ± 0.004  | 0.030 ± 0.007  | 0.022 ± 0.004 | 0.018 ± 0.002 | 0.017 ± 0.002 |
| Tumor        | 0.110 ± 0.029  | 0.124 ± 0.024  | 0.145 ± 0.048 | 0.165 ± 0.029 | 0.196 ± 0.026 |

Table S2-2. Tissue uptake (mean %ID/g ± SD) of <sup>64</sup>Cu-NOTA-Var3 administered via the lateral tail vein in female, BALB/c mice with orthotopic 4T1 breast cancer allografts implanted into the mammary fat pad.

| Tissue                                  | 1 h (n = 5)    | 2 h (n = 5)    | 4 h (n = 5)   | 12 h (n = 5)  | 24 h (n = 4)  |
|-----------------------------------------|----------------|----------------|---------------|---------------|---------------|
| Blood                                   | 1.215 ± 0.223  | 1.226 ± 0.361  | 1.371 ± 0.244 | 1.113 ± 0.136 | 1.073 ± 0.223 |
| Heart                                   | 0.509 ± 0.103  | 0.490 ± 0.067  | 0.489 ± 0.047 | 0.401 ± 0.052 | 0.404 ± 0.104 |
| Lungs                                   | 1.516 ± 0.212  | 1.499 ± 0.231  | 1.420 ± 0.117 | 1.048 ± 0.180 | 1.079 ± 0.179 |
| Liver                                   | 1.273 ± 0.109  | 1.073 ± 0.197  | 1.034 ± 0.150 | 0.631 ± 0.067 | 0.719 ± 0.125 |
| Spleen                                  | 0.305 ± 0.047  | 0.333 ± 0.029  | 0.340 ± 0.032 | 0.289 ± 0.019 | 0.308 ± 0.055 |
| Pancreas                                | 0.291 ± 0.070  | 0.261 ± 0.057  | 0.279 ± 0.041 | 0.219 ± 0.029 | 0.203 ± 0.045 |
| Stomach                                 | 0.267 ± 0.091  | 0.240 ± 0.054  | 0.194 ± 0.050 | 0.227 ± 0.074 | 0.250 ± 0.038 |
| S. intestine                            | 13.092 ± 2.311 | 1.034 ± 0.352  | 0.320 ± 0.042 | 0.263 ± 0.024 | 0.259 ± 0.043 |
| L. intestine                            | 1.988 ± 1.539  | 25.768 ± 5.740 | 7.449 ± 2.726 | 0.507 ± 0.065 | 0.395 ± 0.058 |
| Kidneys                                 | 9.335 ± 0.826  | 7.715 ± 0.750  | 7.165 ± 1.126 | 4.735 ± 0.413 | 4.397 ± 0.874 |
| Muscle                                  | 0.187 ± 0.019  | 0.198 ± 0.052  | 0.171 ± 0.017 | 0.143 ± 0.031 | 0.152 ± 0.051 |
| Bone                                    | 0.216 ± 0.113  | 0.269 ± 0.078  | 0.339 ± 0.018 | 0.320 ± 0.070 | 0.220 ± 0.136 |
| Skin                                    | 0.728 ± 0.205  | 0.720 ± 0.099  | 0.775 ± 0.102 | 0.699 ± 0.192 | 0.672 ± 0.187 |
| Brain                                   | 0.087 ± 0.013  | 0.076 ± 0.018  | 0.063 ± 0.011 | 0.046 ± 0.004 | 0.042 ± 0.010 |
| Tumor                                   | 0.515 ± 0.083  | 0.663 ± 0.167  | 0.649 ± 0.091 | 0.755 ± 0.056 | 0.926 ± 0.175 |
| <b>Tumor-to-tissue ratios (rel. u.)</b> |                |                |               |               |               |
| Tumor/Blood                             | 0.42 ± 0.10    | 0.54 ± 0.21    | 0.47 ± 0.11   | 0.68 ± 0.10   | 0.86 ± 0.24   |
| Tumor/Liver                             | 0.40 ± 0.07    | 0.62 ± 0.19    | 0.63 ± 0.13   | 1.20 ± 0.15   | 1.29 ± 0.33   |
| Tumor/S. I.                             | 0.04 ± 0.01    | 0.64 ± 0.27    | 2.03 ± 0.39   | 2.87 ± 0.34   | 3.57 ± 0.90   |
| Tumor/L. I.                             | 0.26 ± 0.20    | 0.03 ± 0.01    | 0.09 ± 0.03   | 1.49 ± 0.22   | 2.35 ± 0.56   |
| Tumor/Kidney                            | 0.06 ± 0.01    | 0.09 ± 0.02    | 0.09 ± 0.02   | 0.16 ± 0.02   | 0.21 ± 0.06   |
| Tumor/Muscle                            | 2.75 ± 0.52    | 3.34 ± 1.22    | 3.80 ± 0.65   | 5.27 ± 1.22   | 6.11 ± 2.35   |
| Tumor/Bone                              | 2.39 ± 1.31    | 2.46 ± 0.94    | 1.92 ± 0.29   | 2.36 ± 0.55   | 4.21 ± 2.72   |

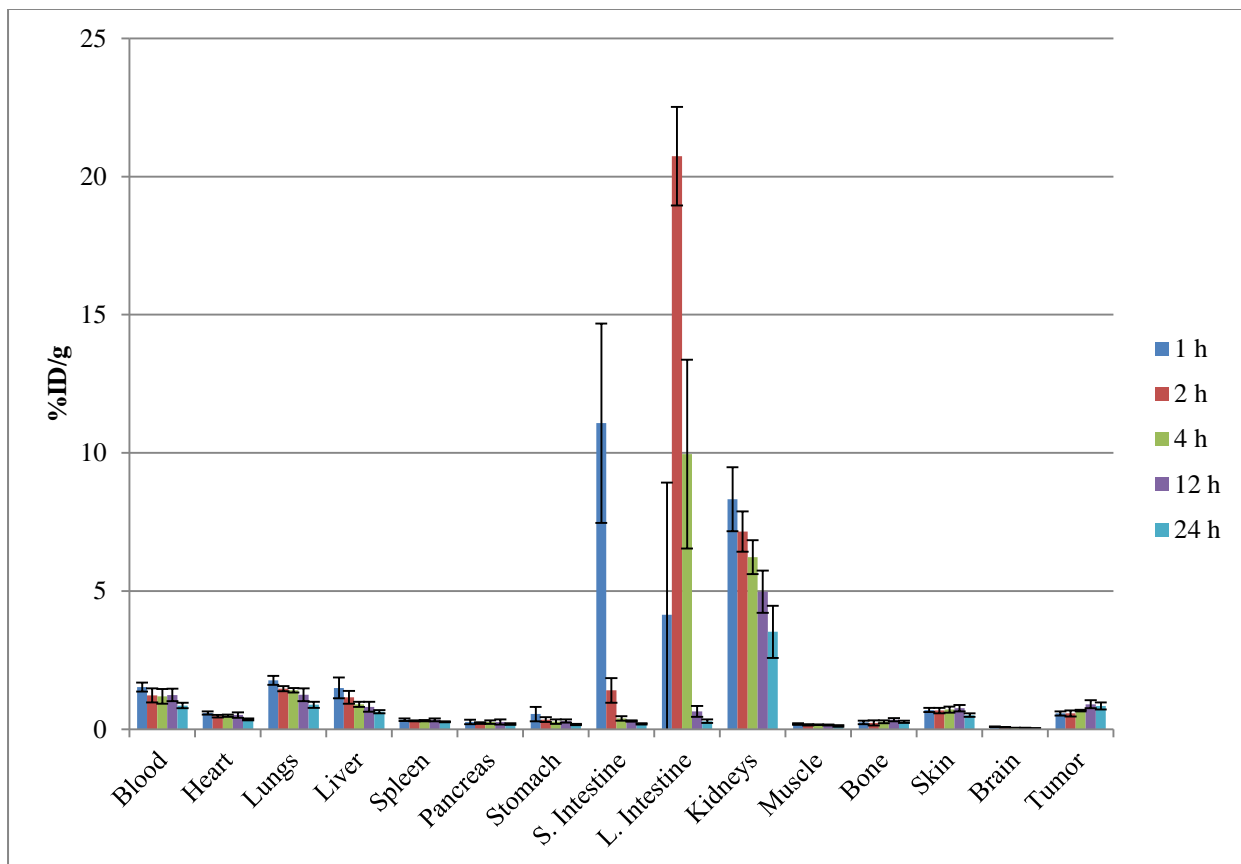

Fig. S2-1. Tissue uptake (mean %ID/g  $\pm$  SD) of  $^{64}\text{Cu}$ -NOTA-Var3 (n = 5 (4 at 4 h)) administered via the lateral tail vein in female, BALB/c mice with orthotopic 4T1 breast cancer allografts implanted into the mammary fat pad full graph from text.

### HPLC Chromatogram of the Reconstituted $^{64}\text{Cu}$ -NOTA-Var3 Injectate

#### BIOSCAN

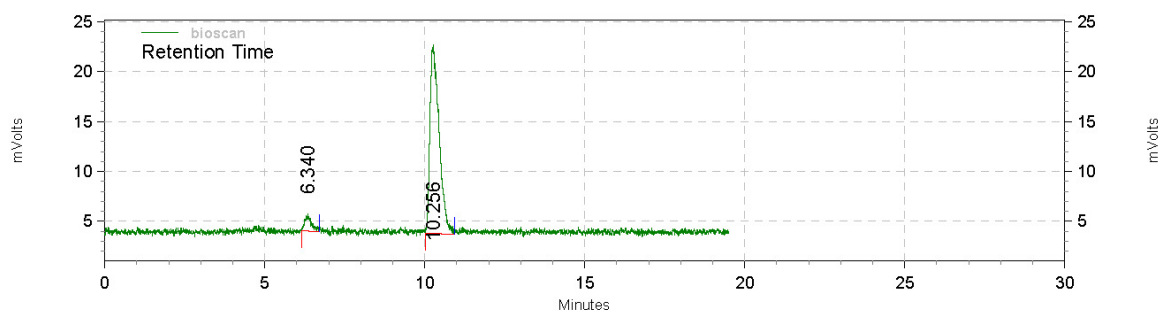

#### bioscan Results

| Retention Time | Area          | Area %        | Height       | Height %      |
|----------------|---------------|---------------|--------------|---------------|
| 6.340          | 23906         | 5.96          | 1735         | 8.39          |
| 10.256         | 377018        | 94.04         | 18950        | 91.61         |
| <b>Totals</b>  | <b>400924</b> | <b>100.00</b> | <b>20685</b> | <b>100.00</b> |

**<sup>64</sup>Cu-NOTA-Var7**

Table S3-1. Tissue uptake (mean %ID ± SD) of <sup>64</sup>Cu-NOTA-var7 administered via the lateral tail vein in female, BALB/c mice with orthotopic 4T1 breast cancer allografts implanted into the mammary fat pad.

| Tissue       | 1 h (n = 4)   | 2 h (n = 4)    | 4 h (n = 4)   | 12 h (n = 4)  | 24 h (n = 4)  |
|--------------|---------------|----------------|---------------|---------------|---------------|
| Blood        | 0.258 ± 0.212 | 0.228 ± 0.118  | 0.070 ± 0.033 | 0.074 ± 0.028 | 0.163 ± 0.116 |
| Heart        | 0.037 ± 0.006 | 0.030 ± 0.004  | 0.035 ± 0.004 | 0.031 ± 0.009 | 0.028 ± 0.005 |
| Lungs        | 0.252 ± 0.010 | 0.289 ± 0.074  | 0.267 ± 0.059 | 0.206 ± 0.059 | 0.142 ± 0.020 |
| Liver        | 0.923 ± 0.229 | 0.640 ± 0.246  | 0.673 ± 0.038 | 0.396 ± 0.028 | 0.298 ± 0.050 |
| Spleen       | 0.032 ± 0.004 | 0.024 ± 0.001  | 0.034 ± 0.004 | 0.034 ± 0.005 | 0.025 ± 0.002 |
| Pancreas     | 0.023 ± 0.005 | 0.018 ± 0.006  | 0.032 ± 0.014 | 0.026 ± 0.009 | 0.018 ± 0.004 |
| Stomach      | 0.081 ± 0.017 | 0.070 ± 0.024  | 0.133 ± 0.026 | 0.085 ± 0.006 | 0.052 ± 0.016 |
| S. intestine | 9.532 ± 1.902 | 0.832 ± 0.367  | 0.374 ± 0.103 | 0.233 ± 0.030 | 0.153 ± 0.026 |
| L. intestine | 0.300 ± 0.072 | 12.452 ± 1.188 | 5.608 ± 0.658 | 0.201 ± 0.026 | 0.265 ± 0.103 |
| Kidneys      | 1.875 ± 0.173 | 1.679 ± 0.078  | 1.764 ± 0.059 | 1.067 ± 0.094 | 0.867 ± 0.124 |
| Muscle       | 0.010 ± 0.005 | 0.015 ± 0.001  | 0.012 ± 0.006 | 0.008 ± 0.003 | 0.007 ± 0.002 |
| Bone         | 0.003 ± 0.002 | 0.002 ± 0.001  | 0.011 ± 0.002 | 0.008 ± 0.003 | 0.004 ± 0.002 |
| Skin         | 0.028 ± 0.014 | 0.041 ± 0.011  | 0.039 ± 0.004 | 0.043 ± 0.014 | 0.038 ± 0.005 |
| Brain        | 0.030 ± 0.007 | 0.019 ± 0.002  | 0.016 ± 0.002 | 0.010 ± 0.004 | 0.011 ± 0.003 |
| Tumor        | 0.074 ± 0.029 | 0.063 ± 0.017  | 0.094 ± 0.017 | 0.158 ± 0.066 | 0.161 ± 0.036 |

Table S3-2. Tissue uptake (mean %ID/g ± SD) of <sup>64</sup>Cu-NOTA-Var7 administered via the lateral tail vein in female, BALB/c mice with orthotopic 4T1 breast cancer allografts implanted into the mammary fat pad.

| Tissue                                  | 1 h (n = 4)   | 2 h (n = 4)    | 4 h (n = 4)   | 12 h (n = 4)  | 24 h (n = 4)  |
|-----------------------------------------|---------------|----------------|---------------|---------------|---------------|
| Blood                                   | 0.988 ± 0.172 | 0.804 ± 0.078  | 0.833 ± 0.068 | 0.759 ± 0.113 | 0.615 ± 0.083 |
| Heart                                   | 0.333 ± 0.055 | 0.316 ± 0.042  | 0.353 ± 0.041 | 0.307 ± 0.036 | 0.282 ± 0.075 |
| Lungs                                   | 1.094 ± 0.153 | 0.979 ± 0.104  | 0.996 ± 0.066 | 0.904 ± 0.088 | 0.666 ± 0.107 |
| Liver                                   | 1.011 ± 0.090 | 0.915 ± 0.152  | 0.739 ± 0.041 | 0.479 ± 0.038 | 0.449 ± 0.091 |
| Spleen                                  | 0.217 ± 0.036 | 0.215 ± 0.020  | 0.279 ± 0.016 | 0.213 ± 0.031 | 0.175 ± 0.030 |
| Pancreas                                | 0.182 ± 0.040 | 0.150 ± 0.032  | 0.198 ± 0.043 | 0.182 ± 0.029 | 0.122 ± 0.019 |
| Stomach                                 | 0.324 ± 0.062 | 0.299 ± 0.107  | 0.300 ± 0.076 | 0.078 ± 0.015 | 0.200 ± 0.070 |
| S. intestine                            | 9.167 ± 2.676 | 0.935 ± 0.329  | 0.307 ± 0.077 | 0.158 ± 0.012 | 0.179 ± 0.044 |
| L. intestine                            | 0.461 ± 0.081 | 18.811 ± 2.211 | 7.782 ± 0.609 | 0.255 ± 0.043 | 0.368 ± 0.098 |
| Kidneys                                 | 6.760 ± 0.950 | 6.065 ± 0.619  | 6.790 ± 0.461 | 4.143 ± 0.512 | 3.410 ± 0.525 |
| Muscle                                  | 0.123 ± 0.018 | 0.141 ± 0.018  | 0.118 ± 0.025 | 0.104 ± 0.016 | 0.101 ± 0.020 |
| Bone                                    | 0.141 ± 0.055 | 0.099 ± 0.053  | 0.229 ± 0.093 | 0.247 ± 0.039 | 0.136 ± 0.064 |
| Skin                                    | 0.490 ± 0.053 | 0.497 ± 0.060  | 0.563 ± 0.145 | 0.566 ± 0.092 | 0.510 ± 0.120 |
| Brain                                   | 0.071 ± 0.016 | 0.053 ± 0.003  | 0.042 ± 0.004 | 0.032 ± 0.007 | 0.032 ± 0.005 |
| Tumor                                   | 0.366 ± 0.034 | 0.414 ± 0.037  | 0.546 ± 0.075 | 0.673 ± 0.078 | 0.693 ± 0.040 |
| <b>Tumor-to-tissue ratios (rel. u.)</b> |               |                |               |               |               |
| Tumor/Blood                             | 0.371 ± 0.073 | 0.515 ± 0.068  | 0.655 ± 0.105 | 0.886 ± 0.168 | 1.126 ± 0.165 |
| Tumor/Liver                             | 0.362 ± 0.047 | 0.452 ± 0.086  | 0.738 ± 0.110 | 1.403 ± 0.198 | 1.542 ± 0.325 |
| Tumor/S. I.                             | 0.040 ± 0.012 | 0.443 ± 0.161  | 1.780 ± 0.510 | 4.259 ± 0.599 | 3.878 ± 0.972 |
| Tumor/L. I.                             | 0.794 ± 0.158 | 0.022 ± 0.003  | 0.070 ± 0.011 | 2.642 ± 0.540 | 1.883 ± 0.514 |
| Tumor/Kidney                            | 0.054 ± 0.009 | 0.068 ± 0.009  | 0.080 ± 0.012 | 0.162 ± 0.028 | 0.203 ± 0.033 |
| Tumor/Muscle                            | 2.966 ± 0.518 | 2.947 ± 0.465  | 4.618 ± 1.167 | 6.444 ± 1.231 | 6.878 ± 1.430 |
| Tumor/Bone                              | 2.598 ± 1.040 | 4.193 ± 2.268  | 2.388 ± 1.030 | 2.727 ± 0.536 | 5.087 ± 2.404 |

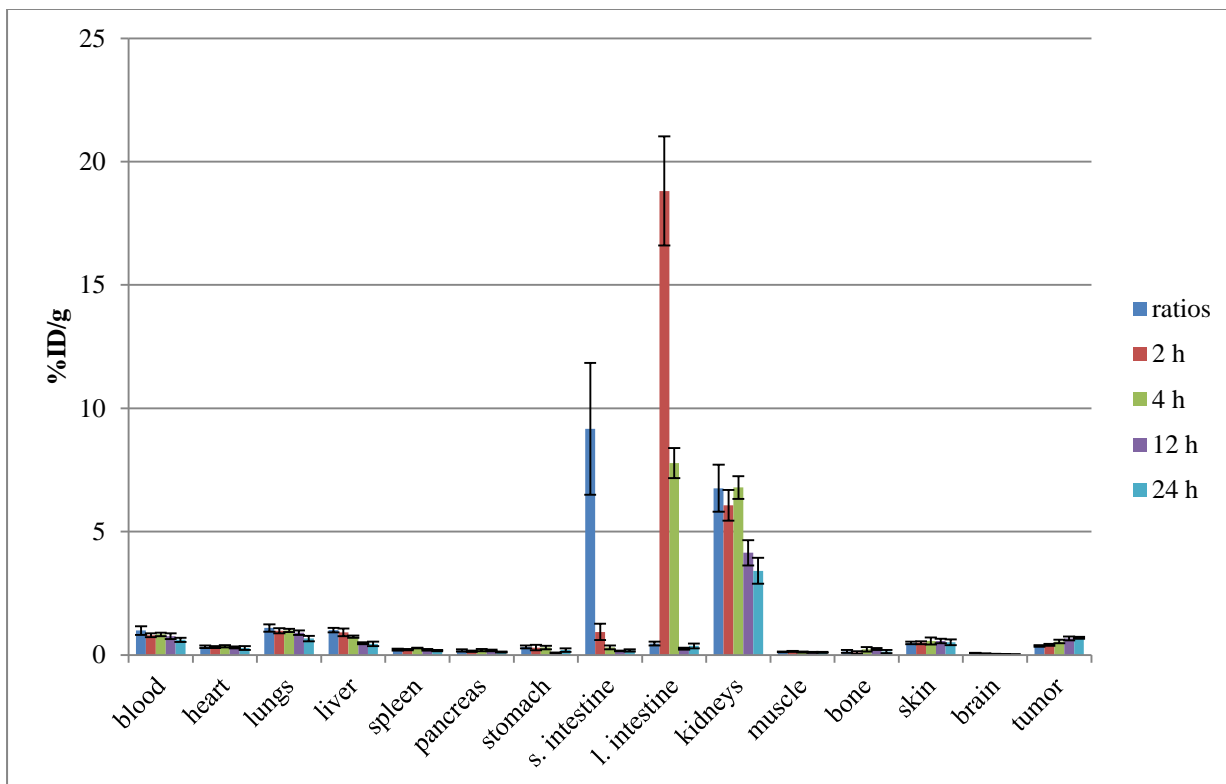

Fig. S3-1. Tissue uptake (mean %ID/g  $\pm$  SD) of <sup>64</sup>Cu-NOTA-var7 (n = 4) administered via the lateral tail vein in female, BALB/c mice with orthotopic 4T1 breast cancer allografts implanted into the mammary fat pad full graph from text.

### HPLC Chromatogram of the Reconstituted <sup>64</sup>Cu-NOTA-Var7 Injectate

#### BIOSCAN

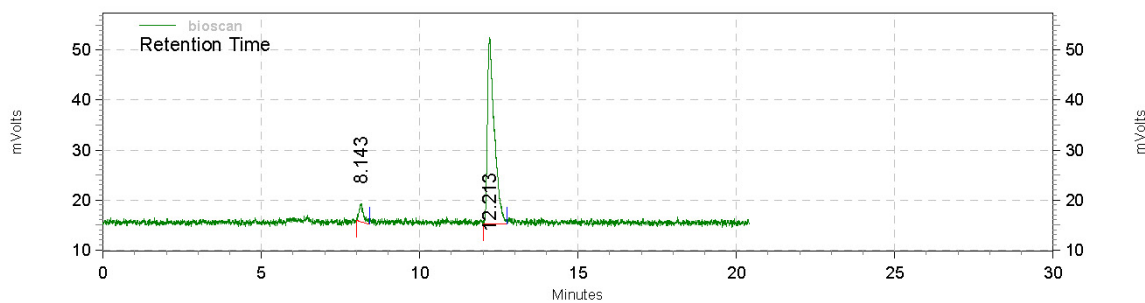

#### bioscan Results

| Retention Time | Area   | Area % | Height | Height % |
|----------------|--------|--------|--------|----------|
| 8.143          | 36720  | 6.07   | 3580   | 8.72     |
| 12.213         | 567879 | 93.93  | 37462  | 91.28    |
| Totals         | 604599 | 100.00 | 41042  | 100.00   |

**<sup>18</sup>F-AIF-NOTA-WT**

Table S4-1. Tissue uptake (mean %ID ± SD) of <sup>18</sup>F-AIF-NOTA-WT administered via the lateral tail vein in female, BALB/c mice with orthotopic 4T1 breast cancer allografts implanted into the mammary fat pad.

| Tissue       | 0.5 h (n = 5)  | 1 h (n = 5)    | 2 h (n = 5)    | 4 h (n = 5)    |
|--------------|----------------|----------------|----------------|----------------|
| Blood        | 1.319 ± 0.188  | 1.112 ± 0.131  | 0.625 ± 0.423  | 0.637 ± 0.462  |
| Heart        | 0.093 ± 0.015  | 0.103 ± 0.031  | 0.092 ± 0.025  | 0.061 ± 0.014  |
| Lungs        | 0.525 ± 0.082  | 0.533 ± 0.125  | 0.468 ± 0.114  | 0.485 ± 0.062  |
| Liver        | 1.681 ± 0.216  | 1.218 ± 0.260  | 1.238 ± 0.281  | 0.794 ± 0.142  |
| Spleen       | 0.069 ± 0.009  | 0.074 ± 0.010  | 0.078 ± 0.006  | 0.068 ± 0.014  |
| Pancreas     | 0.049 ± 0.018  | 0.043 ± 0.008  | 0.049 ± 0.009  | 0.044 ± 0.009  |
| Stomach      | 0.108 ± 0.006  | 0.129 ± 0.033  | 0.118 ± 0.009  | 0.141 ± 0.027  |
| S. intestine | 12.837 ± 0.988 | 13.737 ± 1.399 | 1.120 ± 0.148  | 0.738 ± 0.243  |
| L. intestine | 0.197 ± 0.039  | 0.266 ± 0.079  | 16.243 ± 1.989 | 16.258 ± 1.370 |
| Kidneys      | 5.518 ± 0.849  | 3.471 ± 0.123  | 2.861 ± 0.052  | 2.289 ± 0.250  |
| Muscle       | 0.040 ± 0.007  | 0.038 ± 0.005  | 0.036 ± 0.008  | 0.031 ± 0.011  |
| Bone         | 0.025 ± 0.011  | 0.013 ± 0.003  | 0.034 ± 0.018  | 0.046 ± 0.004  |
| Skin         | 0.114 ± 0.051  | 0.129 ± 0.035  | 0.099 ± 0.029  | 0.105 ± 0.003  |
| Brain        | 0.087 ± 0.007  | 0.063 ± 0.009  | 0.052 ± 0.006  | 0.039 ± 0.008  |
| Tumor        | 0.159 ± 0.045  | 0.163 ± 0.042  | 0.175 ± 0.028  | 0.187 ± 0.060  |

Table S4-2. Tissue uptake (mean %ID/g ± SD) of <sup>18</sup>F-AIF-NOTA-WT administered via the lateral tail vein in female, BALB/c mice with orthotopic 4T1 breast cancer allografts implanted into the mammary fat pad.

| Tissue                                  | 0.5 h (n = 5)  | 1 h (n = 5)    | 2 h (n = 5)    | 4 h (n = 5)    |
|-----------------------------------------|----------------|----------------|----------------|----------------|
| Blood                                   | 2.305 ± 0.308  | 2.034 ± 0.288  | 2.096 ± 0.250  | 1.978 ± 0.192  |
| Heart                                   | 0.919 ± 0.105  | 0.884 ± 0.167  | 0.856 ± 0.091  | 0.664 ± 0.119  |
| Lungs                                   | 2.353 ± 0.250  | 2.288 ± 0.072  | 2.186 ± 0.273  | 2.049 ± 0.211  |
| Liver                                   | 1.964 ± 0.473  | 1.163 ± 0.166  | 1.158 ± 0.189  | 0.973 ± 0.213  |
| Spleen                                  | 0.482 ± 0.080  | 0.423 ± 0.042  | 0.418 ± 0.046  | 0.434 ± 0.058  |
| Pancreas                                | 0.359 ± 0.089  | 0.318 ± 0.018  | 0.355 ± 0.062  | 0.324 ± 0.059  |
| Stomach                                 | 0.406 ± 0.114  | 0.364 ± 0.087  | 0.442 ± 0.077  | 0.518 ± 0.152  |
| S. intestine                            | 12.969 ± 1.568 | 13.510 ± 0.999 | 1.080 ± 0.198  | 0.820 ± 0.245  |
| L. intestine                            | 0.264 ± 0.037  | 0.368 ± 0.126  | 24.375 ± 2.182 | 24.064 ± 2.848 |
| Kidneys                                 | 18.931 ± 3.456 | 12.308 ± 0.760 | 10.247 ± 0.914 | 8.550 ± 1.138  |
| Muscle                                  | 0.360 ± 0.070  | 0.315 ± 0.034  | 0.349 ± 0.073  | 0.283 ± 0.041  |
| Bone                                    | 0.635 ± 0.181  | 0.627 ± 0.185  | 0.702 ± 0.166  | 0.671 ± 0.305  |
| Skin                                    | 1.256 ± 0.240  | 1.138 ± 0.093  | 1.027 ± 0.178  | 1.032 ± 0.133  |
| Brain                                   | 0.218 ± 0.018  | 0.165 ± 0.015  | 0.135 ± 0.009  | 0.100 ± 0.015  |
| Tumor                                   | 0.995 ± 0.242  | 0.930 ± 0.129  | 0.944 ± 0.142  | 1.005 ± 0.232  |
| <b>Tumor-to-tissue ratios (rel. u.)</b> |                |                |                |                |
| Tumor/Blood                             | 0.43 ± 0.12    | 0.46 ± 0.09    | 0.45 ± 0.09    | 0.51 ± 0.13    |
| Tumor/Liver                             | 0.51 ± 0.17    | 0.80 ± 0.16    | 0.82 ± 0.18    | 1.03 ± 0.33    |
| Tumor/S. I.                             | 0.08 ± 0.02    | 0.07 ± 0.01    | 0.87 ± 0.21    | 1.22 ± 0.46    |
| Tumor/L. I.                             | 3.77 ± 1.06    | 2.52 ± 0.93    | 0.04 ± 0.01    | 0.04 ± 0.01    |
| Tumor/Kidney                            | 0.05 ± 0.02    | 0.08 ± 0.01    | 0.092 ± 0.016  | 0.12 ± 0.03    |
| Tumor/Muscle                            | 2.76 ± 0.86    | 2.96 ± 0.52    | 2.70 ± 0.70    | 3.54 ± 0.97    |
| Tumor/Bone                              | 1.57 ± 0.59    | 1.48 ± 0.48    | 1.345 ± 0.377  | 1.50 ± 0.76    |

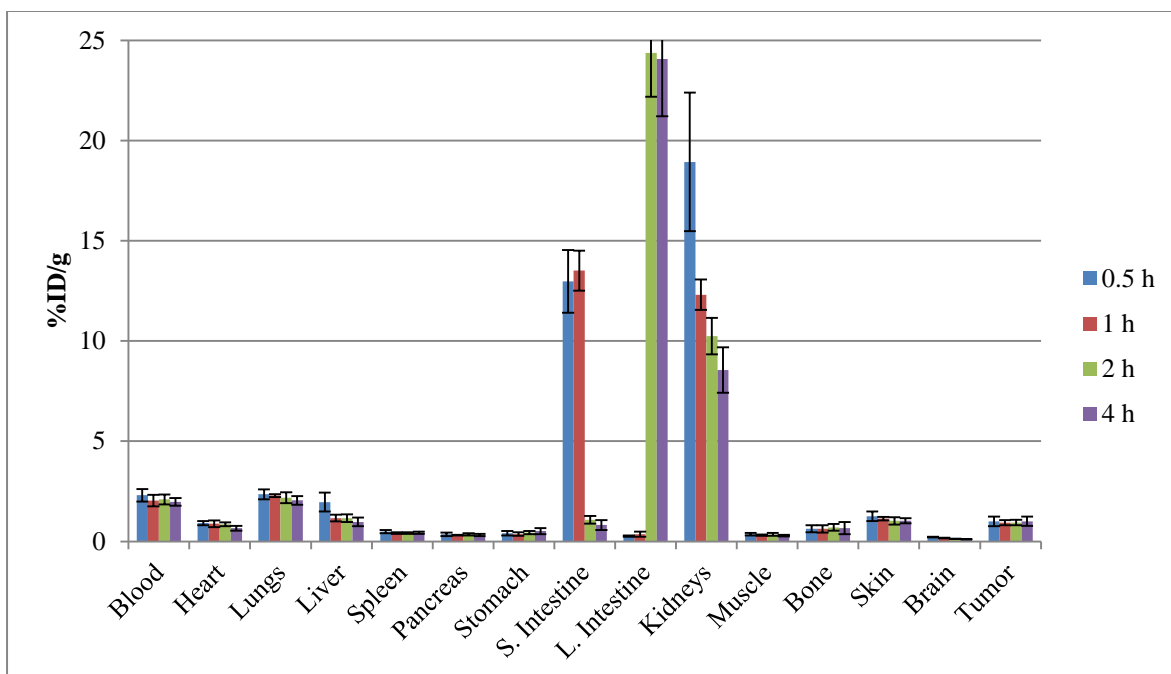

Fig. S4-1. Tissue uptake (mean %ID/g  $\pm$  SD) of  $^{18}\text{F}$ -AIF-NOTA-WT (n = 5) administered via the lateral tail vein in female, BALB/c mice with orthotopic 4T1 breast cancer allografts implanted into the mammary fat pad full graph from text.

HPLC Chromatogram of the Reconstituted  $^{18}\text{F}$ -AIF-NOTA-WT Injectate  
Chromatogram:  $^{18}\text{F}$

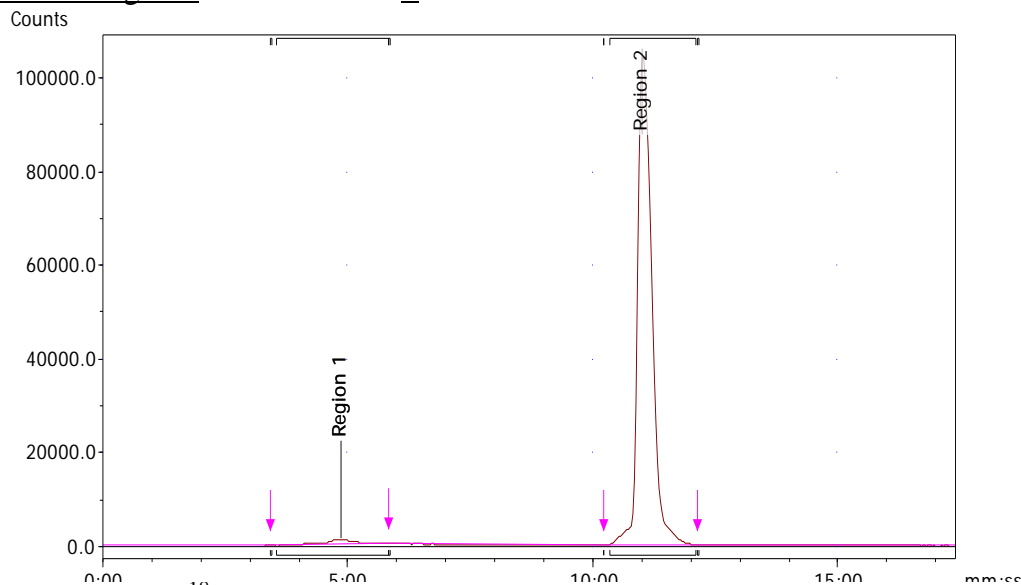

Regions:  $^{18}\text{F}$  Detector: PMT

| Name     | Start (mm:ss) | End (mm:ss) | Retention (mm:ss) | Area (Counts) | %ROI (%) | %Total (%) |
|----------|---------------|-------------|-------------------|---------------|----------|------------|
| Region 1 | 3:32          | 5:49        | 4:51              | 51254.9       | 2.36     | 2.43       |
| Region 2 | 10:21         | 12:06       | 11:01             | 2119006.0     | 97.64    | 100.50     |
| 2 Peaks  |               |             |                   | 2170261.0     | 100.00   | 102.93     |



*<sup>18</sup>F-AIF-NOTA-Var3*

Table S5-1. Tissue uptake (mean %ID ± SD) of <sup>18</sup>F-AIF-NOTA-Var3 administered via the lateral tail vein in female, BALB/c mice with orthotopic 4T1 breast cancer allografts implanted into the mammary fat pad.

| Tissue       | 0.5 h (n = 5)  | 1 h (n = 5)    | 2 h (n = 5)    | 4 h (n = 4)    |
|--------------|----------------|----------------|----------------|----------------|
| Blood        | 0.866 ± 0.319  | 0.481 ± 0.473  | 0.337 ± 0.229  | 1.083 ± 0.234  |
| Heart        | 0.117 ± 0.020  | 0.095 ± 0.019  | 0.093 ± 0.022  | 0.078 ± 0.006  |
| Lungs        | 0.815 ± 0.339  | 0.573 ± 0.157  | 0.588 ± 0.197  | 0.543 ± 0.107  |
| Liver        | 2.398 ± 1.056  | 1.627 ± 0.382  | 1.091 ± 0.215  | 0.779 ± 0.050  |
| Spleen       | 0.096 ± 0.009  | 0.076 ± 0.007  | 0.055 ± 0.014  | 0.070 ± 0.008  |
| Pancreas     | 0.116 ± 0.115  | 0.047 ± 0.008  | 0.047 ± 0.014  | 0.061 ± 0.030  |
| Stomach      | 0.235 ± 0.049  | 0.149 ± 0.029  | 0.132 ± 0.015  | 0.130 ± 0.018  |
| S. intestine | 12.015 ± 1.355 | 13.855 ± 1.696 | 2.964 ± 0.687  | 1.078 ± 0.208  |
| L. intestine | 0.326 ± 0.101  | 1.350 ± 1.253  | 13.535 ± 0.993 | 14.054 ± 1.192 |
| Kidneys      | 6.242 ± 0.722  | 3.442 ± 0.594  | 2.748 ± 0.105  | 2.236 ± 0.141  |
| Muscle       | 0.041 ± 0.014  | 0.044 ± 0.012  | 0.033 ± 0.011  | 0.028 ± 0.004  |
| Bone         | 0.027 ± 0.019  | 0.022 ± 0.014  | 0.017 ± 0.014  | 0.016 ± 0.009  |
| Skin         | 0.171 ± 0.030  | 0.180 ± 0.018  | 0.161 ± 0.040  | 0.106 ± 0.041  |
| Brain        | 0.080 ± 0.014  | 0.063 ± 0.006  | 0.054 ± 0.007  | 0.041 ± 0.011  |
| Tumor        | 0.188 ± 0.033  | 0.164 ± 0.025  | 0.134 ± 0.035  | 0.216 ± 0.047  |

Table S5-2. Tissue uptake (mean %ID/g ± SD) of <sup>18</sup>F-AIF-NOTA-Var3 administered via the lateral tail vein in female, BALB/c mice with orthotopic 4T1 breast cancer allografts implanted into the mammary fat pad.

| Tissue                                  | 0.5 h (n = 5)  | 1 h (n = 5)    | 2 h (n = 5)    | 4 h (n = 4)    |
|-----------------------------------------|----------------|----------------|----------------|----------------|
| Blood                                   | 5.778 ± 2.950  | 2.851 ± 0.208  | 1.998 ± 0.319  | 2.201 ± 0.374  |
| Heart                                   | 1.128 ± 0.154  | 1.024 ± 0.112  | 0.879 ± 0.098  | 0.775 ± 0.079  |
| Lungs                                   | 3.470 ± 0.434  | 2.567 ± 0.497  | 2.375 ± 0.279  | 2.217 ± 0.380  |
| Liver                                   | 2.960 ± 0.390  | 1.605 ± 0.396  | 1.302 ± 0.332  | 0.923 ± 0.153  |
| Spleen                                  | 0.706 ± 0.106  | 0.554 ± 0.053  | 0.440 ± 0.148  | 0.469 ± 0.093  |
| Pancreas                                | 0.754 ± 0.414  | 0.405 ± 0.070  | 0.380 ± 0.140  | 0.332 ± 0.020  |
| Stomach                                 | 1.034 ± 0.138  | 0.648 ± 0.300  | 0.586 ± 0.096  | 0.482 ± 0.223  |
| S. intestine                            | 10.125 ± 1.224 | 12.675 ± 2.221 | 2.671 ± 0.830  | 0.927 ± 0.152  |
| L. intestine                            | 0.434 ± 0.077  | 1.879 ± 1.637  | 19.737 ± 2.432 | 22.047 ± 2.461 |
| Kidneys                                 | 21.180 ± 3.755 | 11.398 ± 1.054 | 10.166 ± 1.290 | 8.237 ± 1.106  |
| Muscle                                  | 0.413 ± 0.040  | 0.391 ± 0.105  | 0.316 ± 0.040  | 0.282 ± 0.055  |
| Bone                                    | 0.626 ± 0.177  | 0.547 ± 0.127  | 0.516 ± 0.063  | 0.540 ± 0.119  |
| Skin                                    | 1.926 ± 0.399  | 1.557 ± 0.270  | 1.411 ± 0.163  | 1.126 ± 0.115  |
| Brain                                   | 0.222 ± 0.033  | 0.162 ± 0.012  | 0.133 ± 0.017  | 0.107 ± 0.023  |
| Tumor                                   | 1.142 ± 0.244  | 0.913 ± 0.046  | 0.802 ± 0.129  | 0.923 ± 0.119  |
| <b>Tumor-to-tissue ratios (rel. u.)</b> |                |                |                |                |
| Tumor/Blood                             | 0.198 ± 0.109  | 0.320 ± 0.028  | 0.401 ± 0.091  | 0.419 ± 0.090  |
| Tumor/Liver                             | 0.386 ± 0.097  | 0.569 ± 0.143  | 0.615 ± 0.186  | 1.000 ± 0.211  |
| Tumor/S. I.                             | 0.113 ± 0.028  | 0.072 ± 0.013  | 0.300 ± 0.105  | 0.996 ± 0.208  |
| Tumor/L. I.                             | 2.631 ± 0.733  | 0.486 ± 0.424  | 0.041 ± 0.008  | 0.042 ± 0.007  |
| Tumor/Kidney                            | 0.054 ± 0.015  | 0.080 ± 0.008  | 0.079 ± 0.016  | 0.112 ± 0.021  |
| Tumor/Muscle                            | 2.763 ± 0.648  | 2.334 ± 0.635  | 2.535 ± 0.520  | 3.277 ± 0.765  |
| Tumor/Bone                              | 1.823 ± 0.646  | 1.668 ± 0.397  | 1.554 ± 0.315  | 1.709 ± 0.436  |

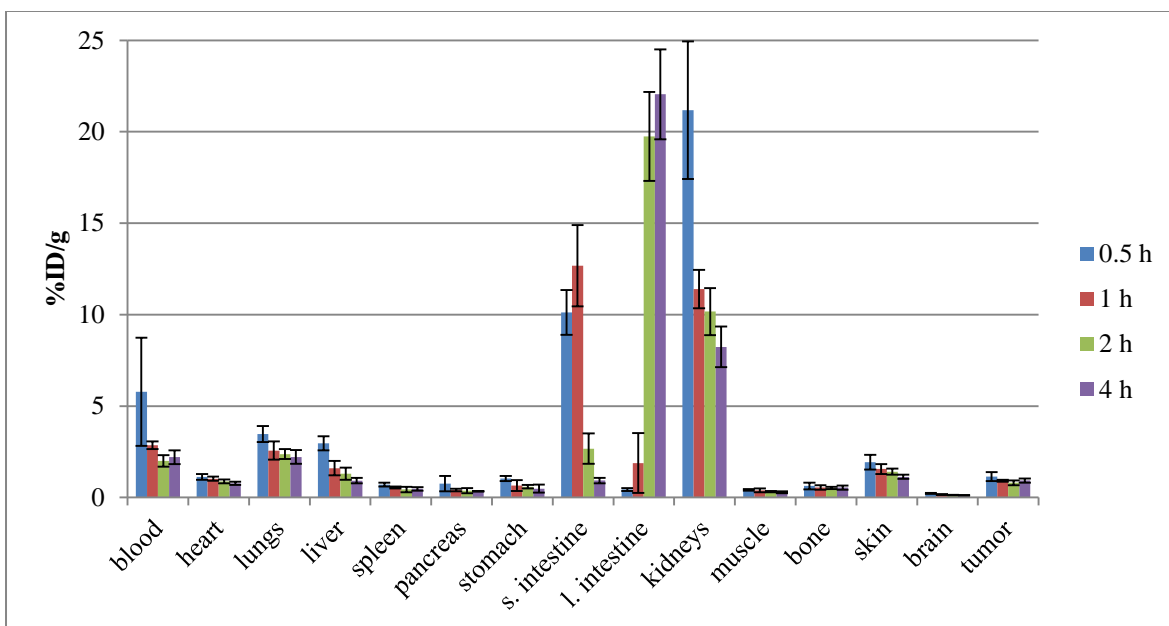

Fig. S5-1. Tissue uptake (mean %ID/g  $\pm$  SD) of  $^{18}\text{F}$ -AIF-NOTA-Var3 (n = 5 (4 at 4 h)) administered via the lateral tail vein in female, BALB/c mice with orthotopic 4T1 breast cancer allografts implanted into the mammary fat pad full graph from text.

HPLC Chromatogram of the Reconstituted  $^{18}\text{F}$ -AIF-NOTA-Var3 Injectate

Chromatogram:

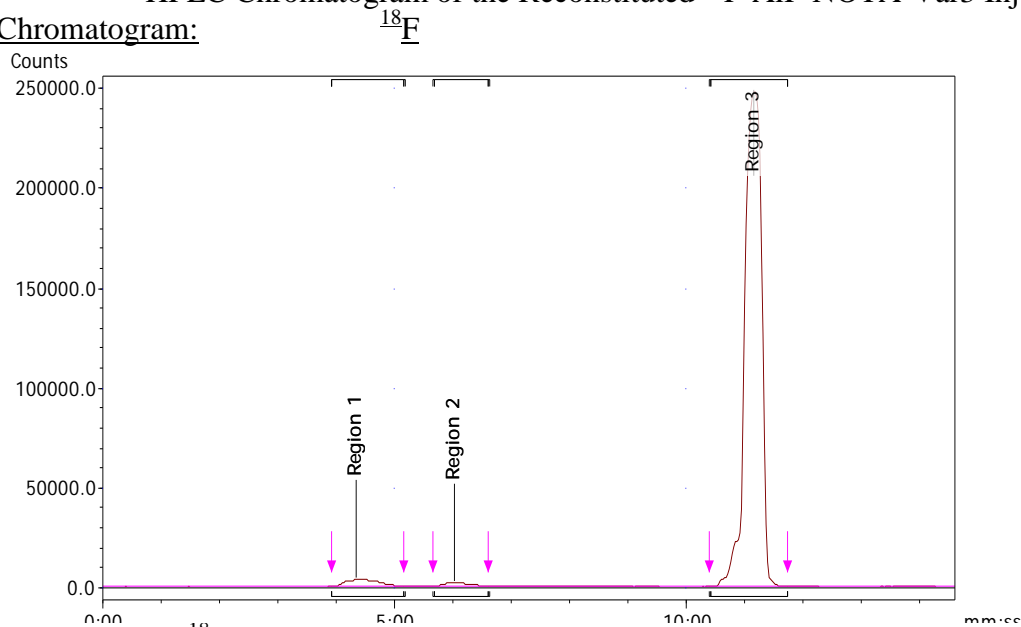

| Regions: | $^{18}\text{F}$ |             | Detector:         | PMT           |          |            |
|----------|-----------------|-------------|-------------------|---------------|----------|------------|
| Name     | Start (mm:ss)   | End (mm:ss) | Retention (mm:ss) | Area (Counts) | %ROI (%) | %Total (%) |
| Region 1 | 3:56            | 5:10        | 4:20              | 125455.0      | 2.43     | 2.46       |
| Region 2 | 5:41            | 6:36        | 6:02              | 43790.0       | 0.85     | 0.86       |
| Region 3 | 10:25           | 11:44       | 11:10             | 4995537.0     | 96.72    | 98.12      |
| 3 Peaks  |                 |             |                   | 5164782.0     | 100.00   | 101.45     |

**<sup>18</sup>F-AIF-NOTA-Var7**

Table S6-1. Tissue uptake (mean %ID ± SD) of <sup>18</sup>F-AIF-NOTA-Var7 administered via the lateral tail vein in female, BALB/c mice with orthotopic 4T1 breast cancer allografts implanted into the mammary fat pad.

| Tissue       | 0.5 h (n = 5) |         | 1 h (n = 5) |         | 2 h (n = 5) |         | 4 h (n = 5) |         |
|--------------|---------------|---------|-------------|---------|-------------|---------|-------------|---------|
| Blood        | 0.840         | ± 0.323 | 0.523       | ± 0.262 | 0.206       | ± 0.126 | 0.149       | ± 0.111 |
| Heart        | 0.105         | ± 0.015 | 0.101       | ± 0.038 | 0.091       | ± 0.022 | 0.076       | ± 0.012 |
| Lungs        | 0.625         | ± 0.122 | 0.555       | ± 0.304 | 0.485       | ± 0.196 | 0.593       | ± 0.054 |
| Liver        | 1.258         | ± 0.785 | 1.083       | ± 0.384 | 1.043       | ± 0.440 | 0.863       | ± 0.132 |
| Spleen       | 0.078         | ± 0.015 | 0.070       | ± 0.014 | 0.070       | ± 0.025 | 0.077       | ± 0.014 |
| Pancreas     | 0.053         | ± 0.013 | 0.042       | ± 0.008 | 0.055       | ± 0.014 | 0.054       | ± 0.015 |
| Stomach      | 0.163         | ± 0.036 | 0.127       | ± 0.039 | 0.136       | ± 0.013 | 0.167       | ± 0.052 |
| S. intestine | 13.273        | ± 1.269 | 11.429      | ± 5.124 | 4.863       | ± 2.873 | 0.905       | ± 0.293 |
| L. intestine | 0.207         | ± 0.050 | 1.006       | ± 1.208 | 10.930      | ± 2.777 | 13.783      | ± 4.870 |
| Kidneys      | 4.639         | ± 0.460 | 2.934       | ± 0.361 | 2.360       | ± 0.178 | 2.147       | ± 0.138 |
| Muscle       | 0.035         | ± 0.008 | 0.024       | ± 0.004 | 0.031       | ± 0.012 | 0.031       | ± 0.007 |
| Bone         | 0.011         | ± 0.004 | 0.011       | ± 0.006 | 0.014       | ± 0.007 | 0.022       | ± 0.021 |
| Skin         | 0.106         | ± 0.024 | 0.091       | ± 0.026 | 0.121       | ± 0.037 | 0.128       | ± 0.027 |
| Brain        | 0.122         | ± 0.098 | 0.066       | ± 0.021 | 0.053       | ± 0.006 | 0.047       | ± 0.006 |
| Tumor        | 0.174         | ± 0.057 | 0.163       | ± 0.055 | 0.163       | ± 0.036 | 0.209       | ± 0.070 |

Table S6-2. Tissue uptake (mean %ID/g ± SD) of <sup>18</sup>F-AIF-NOTA-Var7 administered via the lateral tail vein in female, BALB/c mice with orthotopic 4T1 breast cancer allografts implanted into the mammary fat pad.

| Tissue                                  | 0.5 h (n = 5) |         | 1 h (n = 5) |         | 2 h (n = 5) |         | 4 h (n = 5) |         |
|-----------------------------------------|---------------|---------|-------------|---------|-------------|---------|-------------|---------|
| Blood                                   | 2.961         | ± 0.684 | 2.263       | ± 0.412 | 2.547       | ± 0.642 | 2.292       | ± 0.277 |
| Heart                                   | 0.994         | ± 0.167 | 0.885       | ± 0.247 | 0.918       | ± 0.195 | 0.775       | ± 0.056 |
| Lungs                                   | 2.440         | ± 0.351 | 2.508       | ± 0.683 | 2.532       | ± 0.420 | 2.325       | ± 0.212 |
| Liver                                   | 1.946         | ± 0.408 | 1.433       | ± 0.605 | 1.545       | ± 0.635 | 1.089       | ± 0.066 |
| Spleen                                  | 0.578         | ± 0.156 | 0.419       | ± 0.048 | 0.489       | ± 0.096 | 0.485       | ± 0.029 |
| Pancreas                                | 0.406         | ± 0.047 | 0.340       | ± 0.054 | 0.422       | ± 0.083 | 0.373       | ± 0.051 |
| Stomach                                 | 0.727         | ± 0.373 | 0.444       | ± 0.097 | 0.603       | ± 0.154 | 0.593       | ± 0.153 |
| S. intestine                            | 13.049        | ± 3.020 | 12.437      | ± 6.386 | 4.931       | ± 2.811 | 0.776       | ± 0.196 |
| L. intestine                            | 0.332         | ± 0.078 | 4.535       | ± 6.803 | 18.246      | ± 4.799 | 22.081      | ± 6.021 |
| Kidneys                                 | 17.053        | ± 2.372 | 10.443      | ± 0.757 | 9.250       | ± 1.538 | 7.759       | ± 0.658 |
| Muscle                                  | 0.351         | ± 0.046 | 0.296       | ± 0.117 | 0.327       | ± 0.088 | 0.325       | ± 0.073 |
| Bone                                    | 0.441         | ± 0.086 | 0.355       | ± 0.093 | 0.402       | ± 0.063 | 0.571       | ± 0.202 |
| Skin                                    | 1.439         | ± 0.207 | 1.217       | ± 0.184 | 1.482       | ± 0.329 | 1.377       | ± 0.148 |
| Brain                                   | 0.434         | ± 0.495 | 0.170       | ± 0.034 | 0.128       | ± 0.020 | 0.118       | ± 0.011 |
| Tumor                                   | 0.864         | ± 0.070 | 0.794       | ± 0.230 | 0.915       | ± 0.096 | 1.105       | ± 0.125 |
| <b>Tumor-to-tissue ratios (rel. u.)</b> |               |         |             |         |             |         |             |         |
| Tumor/Blood                             | 0.29          | ± 0.07  | 0.35        | ± 0.12  | 0.36        | ± 0.10  | 0.48        | ± 0.08  |
| Tumor/Liver                             | 0.44          | ± 0.10  | 0.6         | ± 0.3   | 0.6         | ± 0.3   | 1.01        | ± 0.13  |
| Tumor/S. I.                             | 0.066         | ± 0.016 | 0.06        | ± 0.04  | 0.19        | ± 0.11  | 1.4         | ± 0.4   |
| Tumor/L. I.                             | 2.60          | ± 0.64  | 0.17        | ± 0.27  | 0.050       | ± 0.014 | 0.050       | ± 0.015 |
| Tumor/Kidney                            | 0.051         | ± 0.008 | 0.08        | ± 0.02  | 0.099       | ± 0.019 | 0.14        | ± 0.02  |
| Tumor/Muscle                            | 2.5           | ± 0.4   | 2.7         | ± 1.3   | 2.8         | ± 0.8   | 3.4         | ± 0.9   |
| Tumor/Bone                              | 2.0           | ± 0.4   | 2.2         | ± 0.9   | 2.3         | ± 0.4   | 1.9         | ± 0.7   |

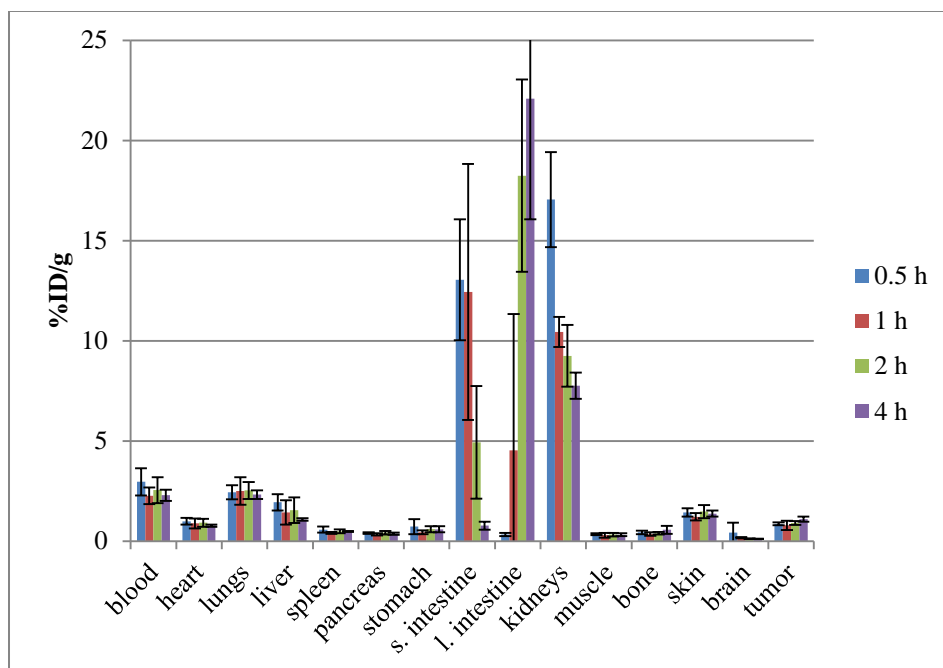

Fig. S6-1. Tissue uptake (mean %ID/g  $\pm$  SD) of  $^{18}\text{F}$ -AIF-NOTA-Var7 (n = 5) administered via the lateral tail vein in female, BALB/c mice with orthotopic 4T1 breast cancer allografts implanted into the mammary fat pad full graph from text.

HPLC Chromatogram of the Reconstituted  $^{18}\text{F}$ -AIF-NOTA-Var7 Injectate

Chromatogram:

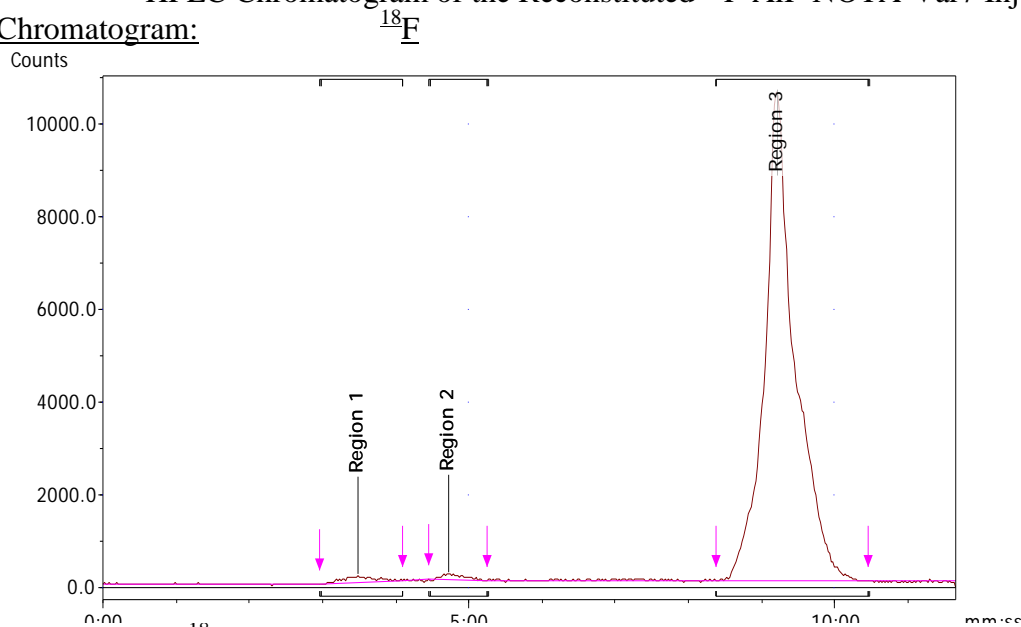

| Regions: | $^{18}\text{F}$ | Detector:   | PMT               |               |          |            |
|----------|-----------------|-------------|-------------------|---------------|----------|------------|
| Name     | Start (mm:ss)   | End (mm:ss) | Retention (mm:ss) | Area (Counts) | %ROI (%) | %Total (%) |
| Region 1 | 2:59            | 4:05        | 3:29              | 2153.0        | 0.70     | 0.70       |
| Region 2 | 4:28            | 5:15        | 4:44              | 3042.0        | 0.98     | 0.99       |
| Region 3 | 8:23            | 10:27       | 9:13              | 304179.0      | 98.32    | 99.27      |
| 3 Peaks  |                 |             |                   | 309374.0      | 100.00   | 100.96     |

<sup>64</sup>Cu-NO2A-cysWT

Table S7-1. Tissue uptake (mean %ID ± SD) of <sup>64</sup>Cu-NO2A-cysWT administered via the lateral tail vein in female, BALB/c mice with orthotopic 4T1 breast cancer allografts implanted into the mammary fat pad.

| Tissue       | 1 h (n=4)   | 2 h (n=4)   | 4 h (n=4)   | 4 h + glucose (n=3) | 12 h (n=4)  | 24 h (n=5)  | 48 h (n=5)  |
|--------------|-------------|-------------|-------------|---------------------|-------------|-------------|-------------|
| Blood        | 2.92 ± 0.76 | 5.56 ± 1.52 | 2.72 ± 0.44 | 2.85 ± 0.87         | 1.46 ± 0.47 | 0.67 ± 0.18 | 0.56 ± 0.15 |
| Heart        | 0.70 ± 0.12 | 0.73 ± 0.17 | 0.51 ± 0.04 | 0.45 ± 0.03         | 0.45 ± 0.07 | 0.47 ± 0.04 | 0.48 ± 0.07 |
| Lungs        | 5.27 ± 0.71 | 3.06 ± 0.52 | 2.88 ± 0.46 | 2.57 ± 0.09         | 1.79 ± 0.34 | 1.72 ± 0.10 | 1.08 ± 0.19 |
| Liver        | 16.7 ± 3.19 | 17.3 ± 1.58 | 22.9 ± 1.00 | 21.9 ± 1.04         | 23.3 ± 3.93 | 23.5 ± 1.99 | 17.3 ± 1.13 |
| Spleen       | 0.51 ± 0.01 | 0.62 ± 0.08 | 0.72 ± 0.02 | 0.68 ± 0.09         | 1.01 ± 0.16 | 1.09 ± 0.11 | 0.63 ± 0.05 |
| Pancreas     | 0.26 ± 0.05 | 0.44 ± 0.18 | 0.40 ± 0.04 | 0.28 ± 0.00         | 0.40 ± 0.05 | 0.46 ± 0.06 | 0.41 ± 0.04 |
| Stomach      | 0.65 ± 0.07 | 0.69 ± 0.04 | 1.06 ± 0.02 | 0.93 ± 0.27         | 1.33 ± 0.24 | 1.65 ± 0.28 | 1.16 ± 0.10 |
| S. intestine | 3.54 ± 0.26 | 4.33 ± 0.59 | 6.76 ± 0.61 | 5.03 ± 0.37         | 8.92 ± 0.65 | 8.94 ± 0.76 | 6.69 ± 0.65 |
| L. intestine | 0.78 ± 0.12 | 1.73 ± 0.13 | 3.19 ± 0.29 | 2.49 ± 0.17         | 6.17 ± 0.50 | 6.26 ± 0.78 | 5.28 ± 0.90 |
| Kidneys      | 7.95 ± 0.84 | 9.93 ± 1.21 | 12.1 ± 1.16 | 8.30 ± 0.24         | 6.01 ± 0.65 | 4.09 ± 0.24 | 2.92 ± 0.18 |
| Muscle       | 0.15 ± 0.04 | 0.15 ± 0.03 | 0.13 ± 0.04 | 0.08 ± 0.01         | 0.20 ± 0.06 | 0.14 ± 0.05 | 0.12 ± 0.03 |
| Bone         | 0.14 ± 0.07 | 0.10 ± 0.02 | 0.12 ± 0.02 | 0.12 ± 0.02         | 0.13 ± 0.01 | 0.14 ± 0.03 | 0.10 ± 0.01 |
| Skin         | 0.31 ± 0.12 | 0.30 ± 0.13 | 0.34 ± 0.05 | 0.32 ± 0.15         | 0.35 ± 0.08 | 0.32 ± 0.06 | 0.21 ± 0.06 |
| Brain        | 0.30 ± 0.03 | 0.22 ± 0.05 | 0.25 ± 0.04 | 0.16 ± 0.05         | 0.13 ± 0.02 | 0.19 ± 0.00 | 0.20 ± 0.01 |
| Tumor        | 0.36 ± 0.10 | 0.48 ± 0.15 | 0.80 ± 0.13 | 0.49 ± 0.10         | 1.12 ± 0.28 | 1.29 ± 0.45 | 0.82 ± 0.22 |

Table S7-2. Tissue uptake (mean %ID/g ± SD) of <sup>64</sup>Cu-NO2A-cysWT administered via the lateral tail vein in female, BALB/c mice with orthotopic 4T1 breast cancer allografts implanted into the mammary fat pad.

| Tissue       | 1 h (n=4)   | 2 h (n=4)   | 4 h (n=4)   | 4 h + glucose (n=3) | 12 h (n=4)  | 24 h (n=5)  | 48 h (n=5)  |
|--------------|-------------|-------------|-------------|---------------------|-------------|-------------|-------------|
| Blood        | 26.5 ± 1.12 | 24.6 ± 2.61 | 17.6 ± 0.86 | 13.8 ± 0.82         | 6.40 ± 0.65 | 3.64 ± 0.15 | 1.90 ± 0.11 |
| Heart        | 6.87 ± 1.05 | 7.08 ± 1.66 | 5.52 ± 0.15 | 4.11 ± 0.35         | 4.01 ± 0.67 | 4.36 ± 0.21 | 5.01 ± 0.49 |
| Lungs        | 19.2 ± 2.29 | 15.4 ± 1.78 | 12.3 ± 1.55 | 10.1 ± 1.23         | 8.18 ± 1.63 | 6.73 ± 0.40 | 6.38 ± 0.25 |
| Liver        | 17.5 ± 1.14 | 20.8 ± 2.62 | 21.9 ± 0.64 | 19.5 ± 2.13         | 19.2 ± 3.33 | 23.3 ± 1.79 | 17.9 ± 1.74 |
| Spleen       | 4.64 ± 0.23 | 5.65 ± 0.80 | 7.07 ± 0.44 | 6.50 ± 0.90         | 8.79 ± 1.60 | 9.80 ± 0.56 | 6.07 ± 0.72 |
| Pancreas     | 2.27 ± 0.14 | 2.83 ± 0.51 | 3.00 ± 0.08 | 2.15 ± 0.25         | 2.71 ± 0.38 | 3.34 ± 0.40 | 2.87 ± 0.08 |
| Stomach      | 1.77 ± 0.19 | 1.83 ± 0.24 | 1.82 ± 0.13 | 2.32 ± 0.15         | 2.81 ± 0.45 | 4.30 ± 0.90 | 3.93 ± 0.89 |
| S. intestine | 2.74 ± 0.15 | 3.53 ± 0.44 | 4.56 ± 0.26 | 3.43 ± 0.33         | 6.47 ± 0.83 | 6.33 ± 0.45 | 5.36 ± 0.65 |
| L. intestine | 1.03 ± 0.08 | 2.16 ± 0.27 | 4.09 ± 0.34 | 3.07 ± 0.13         | 6.52 ± 0.86 | 7.21 ± 1.05 | 5.97 ± 0.98 |
| Kidneys      | 27.3 ± 2.15 | 34.3 ± 3.96 | 40.6 ± 4.04 | 26.3 ± 0.92         | 18.2 ± 3.39 | 13.3 ± 0.58 | 9.86 ± 0.77 |
| Muscle       | 1.04 ± 0.12 | 1.37 ± 0.46 | 1.15 ± 0.08 | 0.82 ± 0.07         | 1.25 ± 0.13 | 1.06 ± 0.11 | 0.94 ± 0.12 |
| Bone         | 2.31 ± 0.19 | 2.58 ± 0.29 | 3.04 ± 0.11 | 2.13 ± 0.38         | 3.04 ± 0.28 | 3.11 ± 0.36 | 1.99 ± 0.15 |
| Skin         | 2.53 ± 0.53 | 2.92 ± 0.59 | 3.23 ± 0.12 | 2.36 ± 0.79         | 3.30 ± 0.51 | 3.22 ± 0.15 | 2.14 ± 0.13 |
| Brain        | 0.75 ± 0.05 | 0.58 ± 0.12 | 0.62 ± 0.06 | 0.39 ± 0.09         | 0.38 ± 0.06 | 0.48 ± 0.03 | 0.51 ± 0.02 |

|                                         |             |             |             |             |             |             |             |
|-----------------------------------------|-------------|-------------|-------------|-------------|-------------|-------------|-------------|
| <b>Tumor</b>                            | 5.03 ± 1.48 | 7.55 ± 2.15 | 11.7 ± 1.71 | 7.10 ± 0.81 | 14.3 ± 2.72 | 12.8 ± 1.55 | 6.16 ± 0.48 |
| <b>Tumor-to-tissue ratios (rel. u.)</b> |             |             |             |             |             |             |             |
| <b>Tumor/Blood</b>                      | 0.19 ± 0.06 | 0.31 ± 0.09 | 0.66 ± 0.10 | 0.52 ± 0.07 | 2.2 ± 0.5   | 3.5 ± 0.5   | 3.2 ± 0.3   |
| <b>Tumor/Liver</b>                      | 0.29 ± 0.09 | 0.36 ± 0.11 | 0.53 ± 0.08 | 0.36 ± 0.06 | 0.75 ± 0.19 | 0.55 ± 0.08 | 0.34 ± 0.04 |
| <b>Tumor/S. I.</b>                      | 1.8 ± 0.5   | 2.1 ± 0.7   | 2.6 ± 0.4   | 2.1 ± 0.3   | 2.2 ± 0.5   | 2.0 ± 0.3   | 1.15 ± 0.17 |
| <b>Tumor/L. I.</b>                      | 4.9 ± 1.5   | 3.5 ± 1.1   | 2.9 ± 0.5   | 2.3 ± 0.3   | 2.2 ± 0.5   | 1.8 ± 0.3   | 1.03 ± 0.19 |
| <b>Tumor/Kidney</b>                     | 0.18 ± 0.06 | 0.22 ± 0.07 | 0.29 ± 0.05 | 0.27 ± 0.03 | 0.8 ± 0.2   | 0.96 ± 0.12 | 0.62 ± 0.07 |
| <b>Tumor/Muscle</b>                     | 4.8 ± 1.5   | 5.5 ± 2.4   | 10.1 ± 1.7  | 8.6 ± 1.2   | 11 ± 2      | 12 ± 2      | 6.6 ± 1.0   |
| <b>Tumor/Bone</b>                       | 2.2 ± 0.7   | 2.9 ± 0.9   | 3.8 ± 0.6   | 3.3 ± 0.7   | 4.7 ± 1.0   | 4.1 ± 0.7   | 3.1 ± 0.3   |

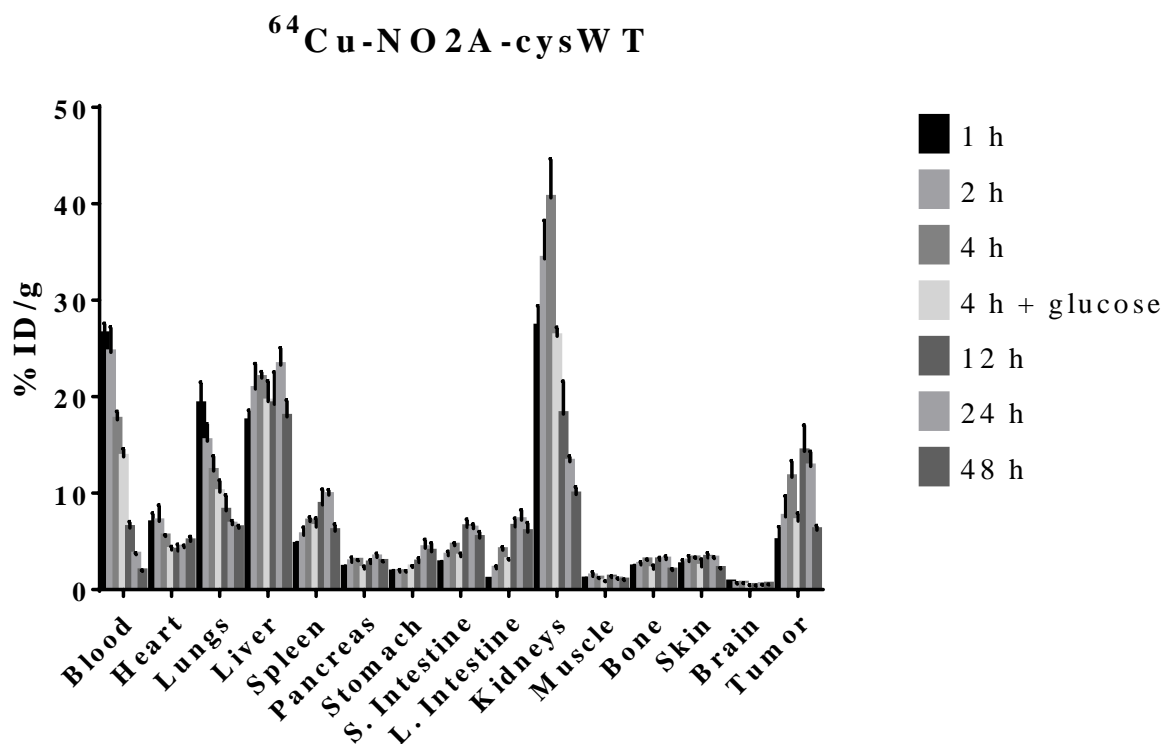

Fig. S7-1. Tissue uptake (mean %ID/g ± SD) of <sup>64</sup>Cu-NO<sub>2</sub>A-cysWT (n = 3-5) administered via the lateral tail vein in female, BALB/c mice with orthotopic 4T1 breast cancer allografts implanted into the mammary fat pad full graph from text. Glucose was administered i.p. 30 min prior to tracer injection.

HPLC Chromatogram of the Reconstituted <sup>64</sup>Cu-NO2A-cysWT Injectate

**BIOSCAN**

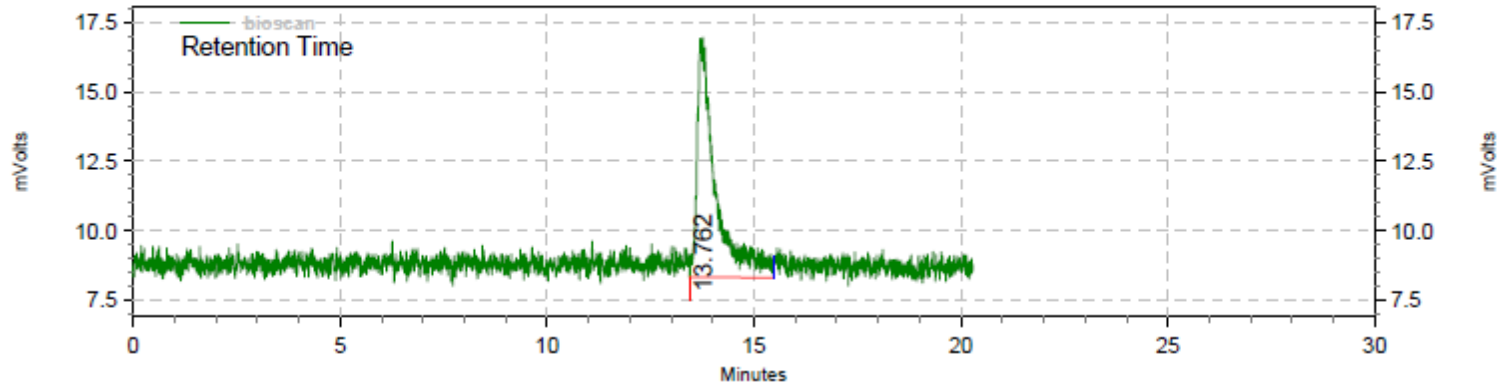

**bioscan Results**

| Retention Time | Area   | Area % | Height | Height % |
|----------------|--------|--------|--------|----------|
| 13.762         | 264129 | 100.00 | 8650   | 100.00   |
| <b>Totals</b>  | 264129 | 100.00 | 8650   | 100.00   |

*<sup>64</sup>Cu-NO2A-cysVar7*

Table S8-1. Tissue uptake (mean %ID ± SD) of <sup>64</sup>Cu-NO2A-cysVar7 administered via the lateral tail vein in female, BALB/c mice with orthotopic 4T1 breast cancer allografts implanted into the mammary fat pad.

| Tissue       | 1 h (n=4)   | 2 h (n=4)   | 4 h (n=4)   | 4 h + glucose (n=4) | 12 h (n=4)  | 24 h (n=5)  | 48 h (n=5)  |
|--------------|-------------|-------------|-------------|---------------------|-------------|-------------|-------------|
| Blood        | 1.96 ± 1.25 | 0.87 ± 0.41 | 0.45 ± 0.09 | 0.39 ± 0.15         | 0.74 ± 0.38 | 0.47 ± 0.10 | 0.28 ± 0.12 |
| Heart        | 0.24 ± 0.04 | 0.21 ± 0.01 | 0.28 ± 0.03 | 0.25 ± 0.02         | 0.49 ± 0.11 | 0.46 ± 0.08 | 0.36 ± 0.04 |
| Lungs        | 1.52 ± 0.27 | 1.02 ± 0.19 | 1.04 ± 0.06 | 0.86 ± 0.12         | 1.56 ± 0.13 | 1.36 ± 0.16 | 0.79 ± 0.07 |
| Liver        | 6.14 ± 0.70 | 9.31 ± 0.68 | 15.7 ± 1.3  | 13.7 ± 0.9          | 18.8 ± 2.8  | 16.4 ± 1.7  | 10.3 ± 1.1  |
| Spleen       | 0.22 ± 0.02 | 0.26 ± 0.02 | 0.35 ± 0.04 | 0.35 ± 0.02         | 0.68 ± 0.20 | 0.55 ± 0.11 | 0.23 ± 0.02 |
| Pancreas     | 0.14 ± 0.01 | 0.18 ± 0.02 | 0.28 ± 0.05 | 0.24 ± 0.03         | 0.38 ± 0.05 | 0.40 ± 0.04 | 0.24 ± 0.07 |
| Stomach      | 0.44 ± 0.10 | 0.65 ± 0.04 | 1.48 ± 0.03 | 1.10 ± 0.36         | 1.83 ± 0.30 | 1.33 ± 0.16 | 1.02 ± 0.20 |
| S. intestine | 2.66 ± 0.29 | 4.74 ± 0.92 | 9.04 ± 0.95 | 5.91 ± 0.44         | 9.73 ± 0.76 | 8.21 ± 0.34 | 4.70 ± 0.27 |
| L. intestine | 0.85 ± 0.17 | 2.07 ± 0.26 | 6.39 ± 0.68 | 4.30 ± 0.87         | 8.64 ± 1.32 | 5.79 ± 0.27 | 4.52 ± 0.51 |
| Kidneys      | 35.5 ± 3.92 | 40.5 ± 1.57 | 29.7 ± 3.4  | 25.1 ± 2.0          | 8.14 ± 0.52 | 5.23 ± 0.47 | 2.97 ± 0.19 |
| Muscle       | 0.10 ± 0.02 | 0.08 ± 0.01 | 0.09 ± 0.02 | 0.09 ± 0.03         | 0.10 ± 0.02 | 0.11 ± 0.03 | 0.08 ± 0.01 |
| Bone         | 0.03 ± 0.01 | 0.03 ± 0.02 | 0.14 ± 0.05 | 0.07 ± 0.00         | 0.10 ± 0.02 | 0.08 ± 0.01 | 0.05 ± 0.01 |
| Skin         | 0.39 ± 0.04 | 0.32 ± 0.10 | 0.29 ± 0.02 | 0.31 ± 0.04         | 0.33 ± 0.03 | 0.24 ± 0.05 | 0.14 ± 0.01 |
| Brain        | 0.08 ± 0.02 | 0.06 ± 0.01 | 0.10 ± 0.01 | 0.08 ± 0.01         | 0.18 ± 0.04 | 0.25 ± 0.02 | 0.21 ± 0.03 |
| Tumor        | 0.38 ± 0.10 | 0.48 ± 0.09 | 0.71 ± 0.13 | 0.63 ± 0.11         | 0.78 ± 0.24 | 0.57 ± 0.24 | 0.37 ± 0.03 |

Table S8-2. Tissue uptake (mean %ID/g ± SD) of <sup>64</sup>Cu-NO2A-cysVar7 administered via the lateral tail vein in female, BALB/c mice with orthotopic 4T1 breast cancer allografts implanted into the mammary fat pad.

| Tissue       | 1 h (n=4)     | 2 h (n=4)    | 4 h (n=4)   | 4 h + glucose (n=4) | 12 h (n=4)  | 24 h (n=5)  | 48 h (n=5)  |
|--------------|---------------|--------------|-------------|---------------------|-------------|-------------|-------------|
| Blood        | 7.21 ± 0.72   | 3.78 ± 1.22  | 2.31 ± 0.18 | 2.36 ± 0.23         | 2.62 ± 0.61 | 2.46 ± 0.35 | 1.43 ± 0.07 |
| Heart        | 2.65 ± 0.33   | 2.14 ± 0.28  | 2.68 ± 0.33 | 2.46 ± 0.25         | 4.41 ± 0.88 | 4.46 ± 0.60 | 4.01 ± 0.18 |
| Lungs        | 6.26 ± 0.72   | 4.01 ± 0.46  | 4.21 ± 0.23 | 3.85 ± 0.23         | 5.79 ± 0.57 | 6.04 ± 0.81 | 5.08 ± 0.30 |
| Liver        | 7.52 ± 0.37   | 10.2 ± 0.70  | 15.6 ± 1.58 | 16.7 ± 2.00         | 17.1 ± 2.93 | 18.4 ± 2.35 | 11.9 ± 0.68 |
| Spleen       | 2.00 ± 0.12   | 2.29 ± 0.25  | 3.31 ± 0.24 | 3.47 ± 0.28         | 5.59 ± 0.88 | 5.43 ± 0.72 | 2.54 ± 0.18 |
| Pancreas     | 1.12 ± 0.08   | 1.23 ± 0.14  | 1.84 ± 0.10 | 1.98 ± 0.14         | 2.52 ± 0.24 | 2.83 ± 0.29 | 2.33 ± 0.26 |
| Stomach      | 1.74 ± 0.62   | 2.02 ± 0.42  | 3.33 ± 0.31 | 3.27 ± 0.83         | 4.09 ± 1.39 | 4.68 ± 0.76 | 2.67 ± 0.81 |
| S. intestine | 2.32 ± 0.30   | 4.02 ± 0.55  | 6.37 ± 0.11 | 4.93 ± 0.57         | 6.96 ± 0.73 | 6.52 ± 0.56 | 4.08 ± 0.29 |
| L. intestine | 1.24 ± 0.21   | 2.82 ± 0.21  | 8.19 ± 0.85 | 6.63 ± 1.37         | 9.88 ± 1.28 | 7.42 ± 0.89 | 6.20 ± 0.96 |
| Kidneys      | 145.5 ± 12.80 | 139.0 ± 13.4 | 95.5 ± 11.9 | 93.8 ± 5.16         | 27.6 ± 4.46 | 19.2 ± 3.08 | 9.73 ± 0.33 |
| Muscle       | 0.98 ± 0.29   | 0.60 ± 0.06  | 0.64 ± 0.07 | 0.73 ± 0.08         | 0.82 ± 0.16 | 0.90 ± 0.15 | 0.71 ± 0.05 |
| Bone         | 0.93 ± 0.19   | 0.95 ± 0.24  | 1.57 ± 0.18 | 1.40 ± 0.14         | 2.12 ± 0.26 | 1.91 ± 0.22 | 1.11 ± 0.05 |
| Skin         | 2.53 ± 0.28   | 2.12 ± 0.11  | 2.59 ± 0.05 | 2.63 ± 0.13         | 2.79 ± 0.46 | 2.47 ± 0.20 | 1.51 ± 0.15 |
| Brain        | 0.20 ± 0.03   | 0.16 ± 0.02  | 0.25 ± 0.02 | 0.22 ± 0.03         | 0.48 ± 0.06 | 0.62 ± 0.07 | 0.53 ± 0.04 |
| Tumor        | 6.54 ± 0.35   | 7.02 ± 0.82  | 9.07 ± 1.81 | 11.2 ± 0.55         | 9.60 ± 0.90 | 7.28 ± 1.21 | 3.90 ± 0.58 |



| Tumor-to-tissue ratios (rel. u.) |               |               |             |               |             |             |             |
|----------------------------------|---------------|---------------|-------------|---------------|-------------|-------------|-------------|
| <b>Tumor/Blood</b>               | 0.91 ± 0.10   | 1.9 ± 0.6     | 3.9 ± 0.8   | 4.7 ± 0.5     | 3.7 ± 0.9   | 3.0 ± 0.6   | 2.7 ± 0.4   |
| <b>Tumor/Liver</b>               | 0.87 ± 0.06   | 0.69 ± 0.09   | 0.58 ± 0.13 | 0.67 ± 0.09   | 0.56 ± 0.11 | 0.40 ± 0.08 | 0.33 ± 0.05 |
| <b>Tumor/S. I.</b>               | 2.8 ± 0.4     | 1.7 ± 0.3     | 1.4 ± 0.3   | 2.3 ± 0.3     | 1.4 ± 0.2   | 1.1 ± 0.2   | 0.96 ± 0.16 |
| <b>Tumor/L. I.</b>               | 5.3 ± 0.9     | 2.5 ± 0.3     | 1.1 ± 0.2   | 1.7 ± 0.4     | 1.0 ± 0.2   | 1.0 ± 0.2   | 0.63 ± 0.14 |
| <b>Tumor/Kidney</b>              | 0.045 ± 0.005 | 0.050 ± 0.008 | 0.09 ± 0.02 | 0.119 ± 0.009 | 0.35 ± 0.06 | 0.38 ± 0.09 | 0.40 ± 0.06 |
| <b>Tumor/Muscle</b>              | 7 ± 2         | 11.7 ± 1.8    | 14 ± 3      | 15.4 ± 1.9    | 12 ± 2      | 8 ± 2       | 5.5 ± 0.9   |
| <b>Tumor/Bone</b>                | 7.1 ± 1.5     | 7 ± 2         | 5.8 ± 1.3   | 7.9 ± 0.9     | 4.5 ± 0.7   | 3.8 ± 0.8   | 3.5 ± 0.5   |

**<sup>64</sup>Cu-NO<sub>2</sub>A-cysVar7**

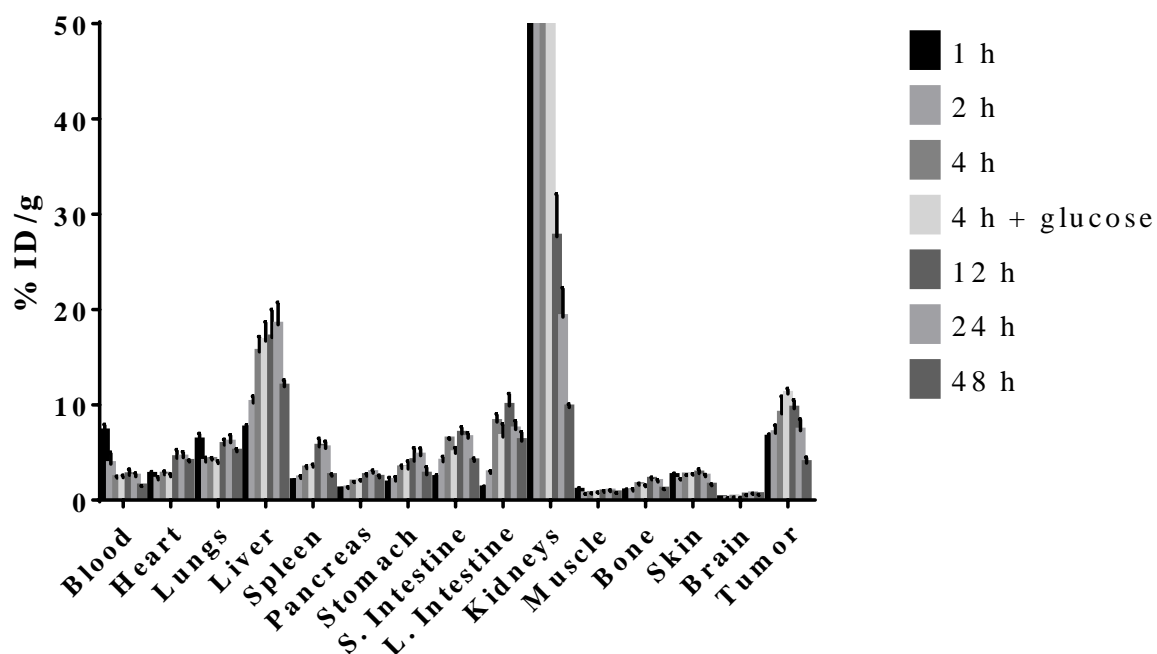

Fig. S8-1. Tissue uptake (mean %ID/g ± SD) of <sup>64</sup>Cu-NO<sub>2</sub>A-cysVar7 (n = 4-5) administered via the lateral tail vein in female, BALB/c mice with orthotopic 4T1 breast cancer allografts implanted into the mammary fat pad full graph from text. Glucose was administered i.p. 30 min prior to tracer injection.

HPLC Chromatogram of the Reconstituted <sup>64</sup>Cu-NO<sub>2</sub>A-cysVar7 Injectate

# BIOSCAN

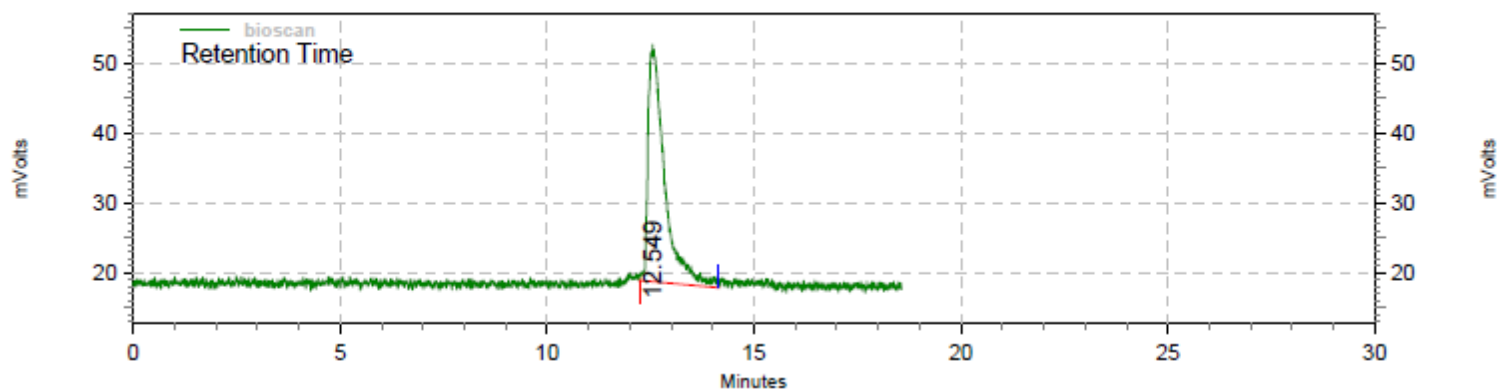

## bioscan Results

| Retention Time | Area   | Area % | Height | Height % |
|----------------|--------|--------|--------|----------|
| 12.549         | 936112 | 100.00 | 33902  | 100.00   |
| Totals         | 936112 | 100.00 | 33902  | 100.00   |

*<sup>18</sup>F-AIF-NO2A-cysWT*

Table S9-1. Tissue uptake (mean %ID ± SD) of <sup>18</sup>F-AIF-NO2A-cysWT administered via the lateral tail vein in female, BALB/c mice with orthotopic 4T1 breast cancer allografts implanted into the mammary fat pad.

| Tissue       | 0.5 h (n=4) | 1 h (n=4)   | 2 h (n=4)   | 4 h (n=4)   | 4 h + glucose (n=4) | 6 h (n=4)   |
|--------------|-------------|-------------|-------------|-------------|---------------------|-------------|
| Blood        | 12.3 ± 5.05 | 5.71 ± 0.45 | 6.72 ± 3.43 | 6.20 ± 3.06 | 4.16 ± 1.89         | 2.39 ± 0.99 |
| Heart        | 0.59 ± 0.07 | 0.66 ± 0.25 | 0.51 ± 0.08 | 0.48 ± 0.15 | 0.35 ± 0.05         | 0.66 ± 0.18 |
| Lungs        | 3.72 ± 2.15 | 4.09 ± 0.32 | 2.84 ± 0.29 | 1.74 ± 0.23 | 1.99 ± 0.13         | 0.98 ± 0.21 |
| Liver        | 13.2 ± 0.74 | 12.9 ± 0.61 | 12.2 ± 0.79 | 14.4 ± 1.53 | 17.9 ± 1.03         | 13.1 ± 1.32 |
| Spleen       | 0.43 ± 0.04 | 0.40 ± 0.08 | 0.43 ± 0.02 | 0.60 ± 0.03 | 0.63 ± 0.08         | 0.93 ± 0.26 |
| Pancreas     | 0.29 ± 0.04 | 0.33 ± 0.08 | 0.27 ± 0.04 | 0.27 ± 0.07 | 0.26 ± 0.08         | 0.57 ± 0.25 |
| Stomach      | 0.50 ± 0.04 | 0.42 ± 0.05 | 0.50 ± 0.12 | 0.38 ± 0.01 | 0.60 ± 0.15         | 0.83 ± 0.23 |
| S. intestine | 2.62 ± 0.29 | 2.55 ± 0.38 | 3.14 ± 0.53 | 3.16 ± 0.18 | 2.82 ± 0.35         | 3.58 ± 0.30 |
| L. intestine | 0.60 ± 0.21 | 0.68 ± 0.24 | 0.78 ± 0.03 | 1.17 ± 0.32 | 1.09 ± 0.26         | 1.64 ± 0.28 |
| Kidneys      | 4.95 ± 0.53 | 6.85 ± 0.74 | 9.95 ± 1.17 | 15.0 ± 0.72 | 11.4 ± 1.58         | 17.7 ± 2.34 |
| Muscle       | 0.12 ± 0.02 | 0.12 ± 0.01 | 0.14 ± 0.02 | 0.15 ± 0.03 | 0.10 ± 0.02         | 0.45 ± 0.31 |
| Bone         | 0.07 ± 0.02 | 0.05 ± 0.01 | 0.05 ± 0.02 | 0.05 ± 0.02 | 0.16 ± 0.07         | 0.47 ± 0.26 |
| Skin         | 0.28 ± 0.08 | 0.35 ± 0.06 | 0.51 ± 0.07 | 0.50 ± 0.08 | 0.20 ± 0.09         | 0.64 ± 0.24 |
| Brain        | 0.26 ± 0.04 | 0.18 ± 0.03 | 0.14 ± 0.02 | 0.13 ± 0.03 | 0.13 ± 0.02         | 0.47 ± 0.24 |
| Tumor        | 0.22 ± 0.06 | 0.25 ± 0.08 | 0.35 ± 0.10 | 0.55 ± 0.12 | 0.48 ± 0.15         | 0.89 ± 0.32 |

Table S9-2. Tissue uptake (mean %ID/g ± SD) of <sup>18</sup>F-AIF-NO2A-cysWT administered via the lateral tail vein in female, BALB/c mice with orthotopic 4T1 breast cancer allografts implanted into the mammary fat pad.

| Tissue       | 0.5 h (n=4) | 1 h (n=4)   | 2 h (n=4)   | 4 h (n=4)   | 4 h + glucose (n=4) | 6 h (n=4)   |
|--------------|-------------|-------------|-------------|-------------|---------------------|-------------|
| Blood        | 35.8 ± 3.22 | 24.3 ± 1.66 | 21.6 ± 1.75 | 15.9 ± 0.63 | 14.0 ± 0.73         | 10.0 ± 1.91 |
| Heart        | 6.33 ± 0.75 | 6.18 ± 1.69 | 5.40 ± 0.59 | 4.78 ± 0.53 | 3.79 ± 0.48         | 7.48 ± 2.47 |
| Lungs        | 17.0 ± 5.66 | 15.1 ± 1.58 | 12.4 ± 0.44 | 8.73 ± 0.84 | 7.27 ± 0.26         | 6.34 ± 1.53 |
| Liver        | 16.3 ± 1.39 | 13.7 ± 1.52 | 15.4 ± 1.23 | 12.6 ± 11.4 | 18.4 ± 1.31         | 14.5 ± 1.60 |
| Spleen       | 4.06 ± 0.43 | 3.64 ± 0.31 | 4.12 ± 0.15 | 5.31 ± 0.34 | 5.89 ± 0.45         | 8.25 ± 2.44 |
| Pancreas     | 2.09 ± 0.09 | 1.97 ± 0.29 | 1.86 ± 0.18 | 2.10 ± 0.43 | 2.01 ± 0.58         | 5.00 ± 2.53 |
| Stomach      | 2.47 ± 0.70 | 1.35 ± 0.15 | 2.01 ± 0.34 | 1.31 ± 0.96 | 1.96 ± 0.16         | 2.05 ± 1.11 |
| S. intestine | 2.58 ± 0.39 | 2.12 ± 0.19 | 2.83 ± 0.27 | 2.85 ± 0.31 | 2.34 ± 0.20         | 3.15 ± 0.54 |
| L. intestine | 0.93 ± 0.21 | 0.92 ± 0.21 | 1.19 ± 0.08 | 1.47 ± 0.14 | 1.61 ± 0.26         | 2.54 ± 0.34 |
| Kidneys      | 18.8 ± 1.96 | 23.4 ± 2.15 | 36.1 ± 6.63 | 59.1 ± 3.63 | 42.6 ± 10.9         | 64.8 ± 14.3 |
| Muscle       | 0.96 ± 0.10 | 0.93 ± 0.05 | 1.18 ± 0.04 | 1.23 ± 0.17 | 0.81 ± 0.12         | 3.71 ± 2.52 |
| Bone         | 2.43 ± 0.39 | 1.82 ± 0.19 | 1.99 ± 0.30 | 1.94 ± 0.45 | 2.70 ± 0.15         | 11.2 ± 6.44 |
| Skin         | 1.97 ± 0.11 | 1.93 ± 0.11 | 2.87 ± 0.13 | 2.85 ± 0.22 | 1.95 ± 0.34         | 6.39 ± 2.36 |
| Brain        | 0.70 ± 0.12 | 0.49 ± 0.08 | 0.41 ± 0.03 | 0.34 ± 0.06 | 0.32 ± 0.05         | 1.39 ± 0.35 |
| Tumor        | 3.56 ± 0.92 | 4.20 ± 1.02 | 6.52 ± 0.92 | 8.16 ± 0.53 | 6.66 ± 0.91         | 15.6 ± 3.49 |

| Tumor-to-tissue ratios (rel. u.) |             |             |             |               |             |             |
|----------------------------------|-------------|-------------|-------------|---------------|-------------|-------------|
| Tumor/Blood                      | 0.10 ± 0.03 | 0.17 ± 0.04 | 0.30 ± 0.05 | 0.51 ± 0.04   | 0.48 ± 0.07 | 1.6 ± 0.5   |
| Tumor/Liver                      | 0.22 ± 0.06 | 0.31 ± 0.08 | 0.42 ± 0.07 | 0.6 ± 0.6     | 0.36 ± 0.06 | 1.1 ± 0.3   |
| Tumor/S. I.                      | 1.4 ± 0.4   | 2.0 ± 0.5   | 2.3 ± 0.4   | 2.9 ± 0.4     | 2.8 ± 0.5   | 4.9 ± 1.4   |
| Tumor/L. I.                      | 3.8 ± 1.3   | 4.6 ± 1.5   | 5.5 ± 0.9   | 5.5 ± 0.6     | 4.1 ± 0.9   | 6.1 ± 1.6   |
| Tumor/Kidney                     | 0.19 ± 0.05 | 0.18 ± 0.05 | 0.18 ± 0.04 | 0.138 ± 0.012 | 0.16 ± 0.05 | 0.24 ± 0.08 |
| Tumor/Muscle                     | 3.7 ± 1.0   | 4.5 ± 1.1   | 5.5 ± 0.8   | 6.6 ± 1.0     | 8 ± 2       | 4.2 ± 3.0   |
| Tumor/Bone                       | 1.5 ± 0.4   | 2.3 ± 0.6   | 3.3 ± 0.7   | 4.2 ± 1.0     | 2.5 ± 0.4   | 1.4 ± 0.9   |

### 18F-AIF-NO2A-cysWT

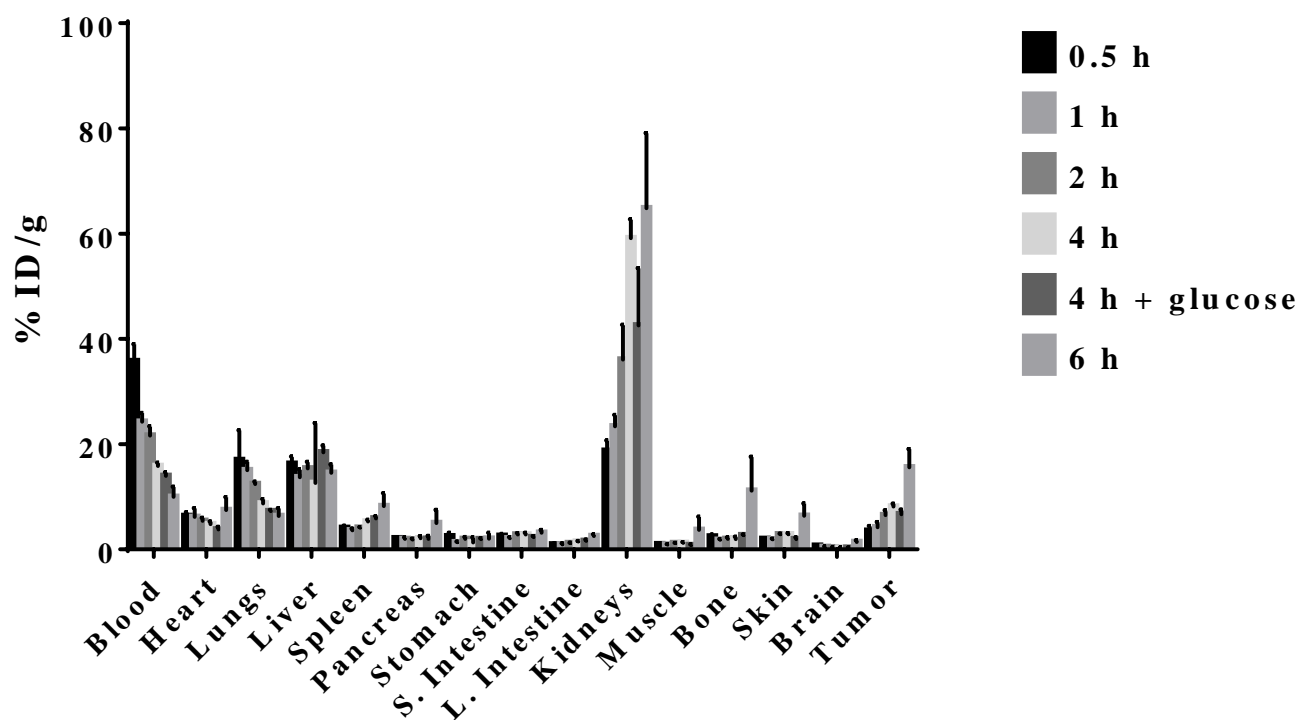

Fig. S9-1. Tissue uptake (mean %ID/g ± SD) of <sup>18</sup>F-AIF-NO<sub>2</sub>A-cysWT (n = 4) administered via the lateral tail vein in female, BALB/c mice with orthotopic 4T1 breast cancer allografts implanted into the mammary fat pad full graph from text. Glucose was administered i.p. 30 min prior to tracer injection.

HPLC Chromatogram of the Reconstituted <sup>18</sup>F-AIF-NO2A-cysWT Injectate

**BIOSCAN**

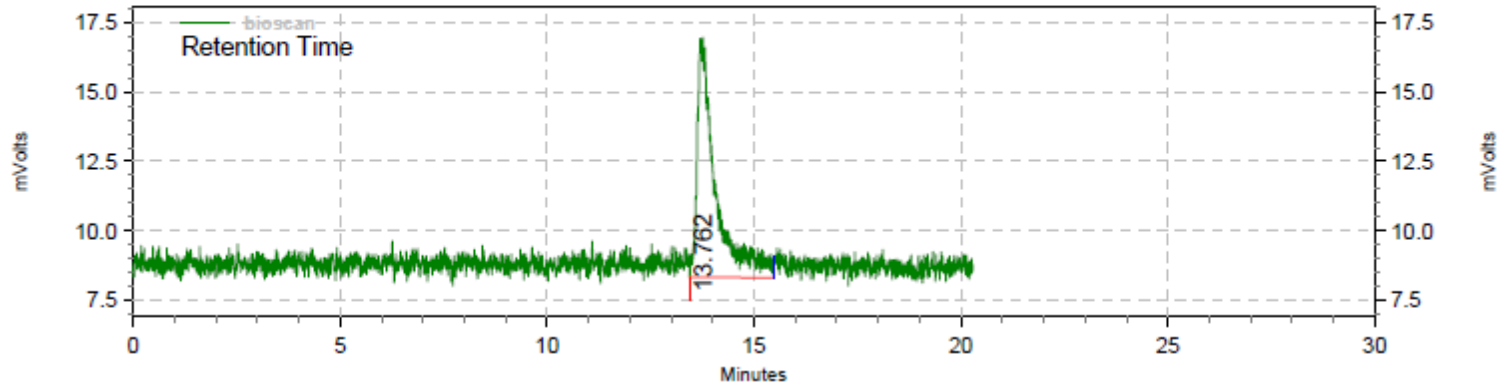

**bioscan Results**

| Retention Time | Area   | Area % | Height | Height % |
|----------------|--------|--------|--------|----------|
| 13.762         | 264129 | 100.00 | 8650   | 100.00   |
| <b>Totals</b>  | 264129 | 100.00 | 8650   | 100.00   |

*<sup>18</sup>F-AIF-NO2A-cysVar7*

Table S10-1. Tissue uptake (mean %ID ± SD) of <sup>18</sup>F-AIF-NO2A-cysVar7 administered via the lateral tail vein in female, BALB/c mice with orthotopic 4T1 breast cancer allografts implanted into the mammary fat pad.

| Tissue       | 0.5 h (n=4) | 1 h (n=4)   | 2 h (n=3)   | 4 h (n=4)     | 4 h + glucose (n=3) | 6 h (n=5)     |
|--------------|-------------|-------------|-------------|---------------|---------------------|---------------|
| Blood        | 3.89 ± 2.41 | 1.92 ± 1.54 | 3.21 ± 2.40 | 0.71 ± 0.37   | 3.12 ± 0.52         | 0.12 ± 0.09   |
| Heart        | 0.36 ± 0.05 | 0.24 ± 0.04 | 0.33 ± 0.31 | 0.08 ± 0.02   | 0.13 ± 0.01         | 0.063 ± 0.005 |
| Lungs        | 1.83 ± 0.54 | 1.40 ± 0.32 | 1.05 ± 0.44 | 0.40 ± 0.09   | 0.08 ± 0.04         | 0.17 ± 0.03   |
| Liver        | 4.97 ± 0.36 | 3.55 ± 0.18 | 4.26 ± 2.00 | 2.15 ± 0.35   | 0.18 ± 0.03         | 2.17 ± 0.22   |
| Spleen       | 0.19 ± 0.02 | 0.15 ± 0.01 | 0.18 ± 0.12 | 0.12 ± 0.01   | 1.04 ± 0.12         | 0.11 ± 0.02   |
| Pancreas     | 0.17 ± 0.03 | 0.14 ± 0.03 | 0.14 ± 0.08 | 0.07 ± 0.01   | 0.61 ± 0.05         | 0.05 ± 0.01   |
| Stomach      | 0.40 ± 0.10 | 0.22 ± 0.01 | 0.25 ± 0.12 | 0.15 ± 0.01   | 52.4 ± 9.57         | 0.17 ± 0.02   |
| S. intestine | 1.63 ± 0.34 | 1.34 ± 0.26 | 1.96 ± 1.54 | 0.96 ± 0.08   | 0.04 ± 0.01         | 0.67 ± 0.08   |
| L. intestine | 0.70 ± 0.05 | 0.51 ± 0.07 | 0.69 ± 0.36 | 0.59 ± 0.06   | 0.02 ± 0.00         | 0.53 ± 0.03   |
| Kidneys      | 23.8 ± 4.50 | 40.1 ± 4.20 | 42.2 ± 21.6 | 62.9 ± 3.68   | 0.30 ± 0.04         | 70.5 ± 5.72   |
| Muscle       | 0.13 ± 0.03 | 0.06 ± 0.01 | 0.07 ± 0.03 | 0.03 ± 0.01   | 0.03 ± 0.00         | 0.043 ± 0.003 |
| Bone         | 0.04 ± 0.02 | 0.02 ± 0.01 | 0.03 ± 0.02 | 0.02 ± 0.01   | 0.40 ± 0.11         | 0.05 ± 0.02   |
| Skin         | 0.54 ± 0.06 | 0.35 ± 0.05 | 0.38 ± 0.16 | 0.27 ± 0.03   | 0.81 ± 0.23         | 0.15 ± 0.02   |
| Brain        | 0.10 ± 0.03 | 0.04 ± 0.01 | 0.09 ± 0.11 | 0.020 ± 0.003 | 1.04 ± 0.91         | 0.012 ± 0.004 |
| Tumor        | 0.21 ± 0.05 | 0.30 ± 0.09 | 0.27 ± 0.09 | 0.53 ± 0.11   | 0.11 ± 0.03         | 0.51 ± 0.10   |

Table S10-2. Tissue uptake (mean %ID/g ± SD) of <sup>18</sup>F-AIF-NO2A-cysVar7 administered via the lateral tail vein in female, BALB/c mice with orthotopic 4T1 breast cancer allografts implanted into the mammary fat pad.

| Tissue       | 0.5 h (n=4) | 1 h (n=4)   | 2 h (n=3)   | 4 h (n=4)   | 4 h + glucose (n=3) | 6 h (n=5)   |
|--------------|-------------|-------------|-------------|-------------|---------------------|-------------|
| Blood        | 14.9 ± 2.24 | 8.51 ± 2.65 | 4.87 ± 0.42 | 1.64 ± 0.18 | 2.37 ± 0.35         | 0.52 ± 0.17 |
| Heart        | 3.91 ± 0.56 | 2.34 ± 0.19 | 1.85 ± 0.26 | 0.89 ± 0.12 | 1.21 ± 0.19         | 0.70 ± 0.07 |
| Lungs        | 9.45 ± 1.91 | 5.72 ± 0.87 | 3.96 ± 0.21 | 1.66 ± 0.07 | 2.22 ± 0.27         | 0.97 ± 0.20 |
| Liver        | 5.89 ± 0.65 | 3.84 ± 0.29 | 3.86 ± 0.33 | 2.90 ± 0.18 | 4.02 ± 0.14         | 2.49 ± 0.13 |
| Spleen       | 2.06 ± 0.14 | 1.40 ± 0.17 | 1.38 ± 0.07 | 1.19 ± 0.10 | 1.61 ± 0.21         | 1.05 ± 0.06 |
| Pancreas     | 1.29 ± 0.13 | 0.90 ± 0.19 | 0.71 ± 0.03 | 0.49 ± 0.03 | 0.64 ± 0.24         | 0.41 ± 0.05 |
| Stomach      | 1.90 ± 0.61 | 0.87 ± 0.09 | 0.94 ± 0.12 | 0.68 ± 0.10 | 0.80 ± 0.09         | 0.39 ± 0.11 |
| S. intestine | 1.73 ± 0.30 | 1.26 ± 0.11 | 1.11 ± 0.09 | 0.91 ± 0.03 | 1.03 ± 0.12         | 0.62 ± 0.08 |
| L. intestine | 1.11 ± 0.06 | 0.77 ± 0.11 | 0.79 ± 0.06 | 0.91 ± 0.12 | 1.05 ± 0.17         | 0.75 ± 0.15 |
| Kidneys      | 91.0 ± 20.4 | 139 ± 11.9  | 196 ± 20.3  | 246 ± 25.6  | 198 ± 23.7          | 254 ± 24.4  |
| Muscle       | 1.22 ± 0.06 | 0.63 ± 0.06 | 0.59 ± 0.12 | 0.35 ± 0.06 | 0.44 ± 0.06         | 0.32 ± 0.05 |
| Bone         | 1.03 ± 0.13 | 0.79 ± 0.17 | 0.78 ± 0.37 | 0.60 ± 0.12 | 0.86 ± 0.14         | 0.79 ± 0.08 |
| Skin         | 3.23 ± 0.40 | 2.19 ± 0.23 | 1.93 ± 0.13 | 1.59 ± 0.10 | 1.82 ± 0.12         | 1.45 ± 0.16 |
| Brain        | 0.29 ± 0.04 | 0.14 ± 0.03 | 0.10 ± 0.01 | 0.05 ± 0.01 | 0.08 ± 0.00         | 0.03 ± 0.01 |
| Tumor        | 4.52 ± 0.54 | 5.04 ± 0.94 | 6.60 ± 1.22 | 8.61 ± 1.21 | 6.20 ± 1.55         | 7.86 ± 1.40 |

| Tumor-to-tissue ratios (rel. u.) |               |               |               |               |               |               |
|----------------------------------|---------------|---------------|---------------|---------------|---------------|---------------|
| <b>Tumor/Blood</b>               | 0.30 ± 0.06   | 0.6 ± 0.2     | 1.4 ± 0.3     | 5.3 ± 0.9     | 2.6 ± 0.8     | 15 ± 6        |
| <b>Tumor/Liver</b>               | 0.77 ± 0.12   | 1.3 ± 0.3     | 1.7 ± 0.3     | 3.0 ± 0.5     | 1.5 ± 0.4     | 3.2 ± 0.6     |
| <b>Tumor/S. I.</b>               | 2.6 ± 0.6     | 4.0 ± 0.8     | 6.0 ± 1.2     | 9.5 ± 1.4     | 6.0 ± 1.7     | 13 ± 3        |
| <b>Tumor/L. I.</b>               | 4.1 ± 0.5     | 6.5 ± 1.5     | 8.3 ± 1.6     | 9.5 ± 1.8     | 5.9 ± 1.8     | 10 ± 3        |
| <b>Tumor/Kidney</b>              | 0.050 ± 0.013 | 0.036 ± 0.007 | 0.034 ± 0.007 | 0.035 ± 0.006 | 0.031 ± 0.009 | 0.031 ± 0.006 |
| <b>Tumor/Muscle</b>              | 3.7 ± 0.5     | 8.0 ± 1.7     | 11 ± 3        | 24 ± 5        | 14 ± 4        | 24 ± 6        |
| <b>Tumor/Bone</b>                | 4.4 ± 0.8     | 6.4 ± 1.8     | 8 ± 4         | 14 ± 4        | 7 ± 2         | 10 ± 2        |

<sup>18</sup>F-AIF-NO<sub>2</sub>A-cysVar7

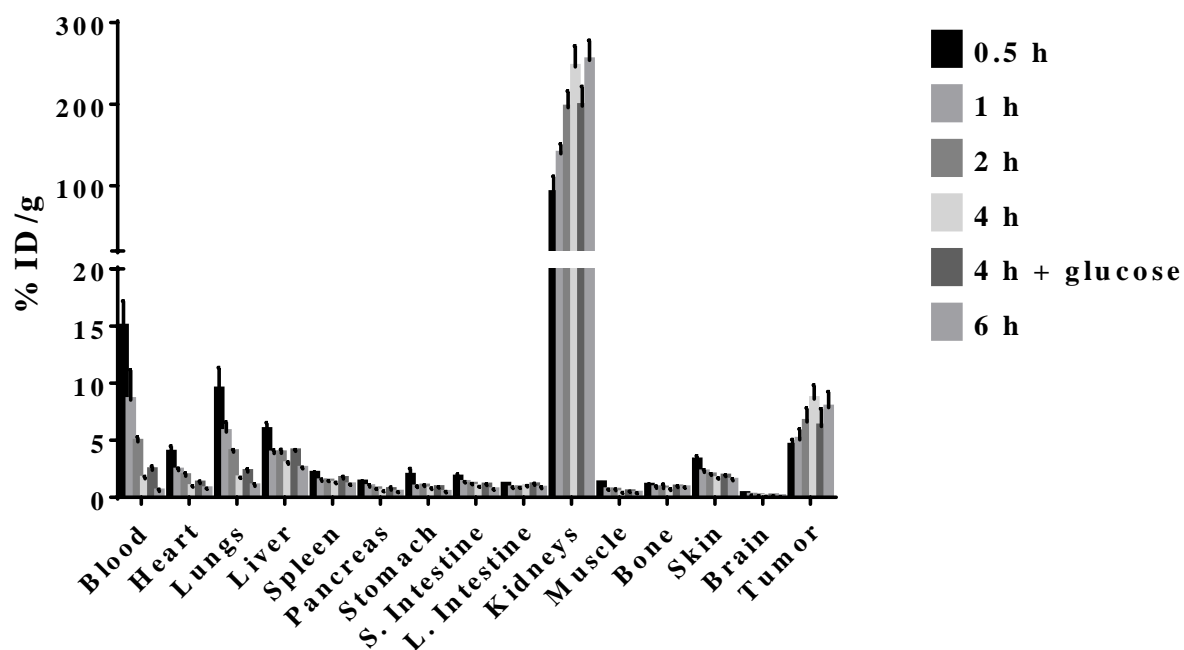

Fig. S10-1. Tissue uptake (mean % ID/g ± SD) of <sup>18</sup>F-AIF-NO<sub>2</sub>A-cysVar7 (n = 3-5) administered via the lateral tail vein in female, BALB/c mice with orthotopic 4T1 breast cancer allografts implanted into the mammary fat pad full graph from text. Glucose was administered i.p. 30 min prior to tracer injection.

HPLC Chromatogram of the Reconstituted <sup>18</sup>F-AIF-NO<sub>2</sub>A-cysVar7 Injectate

# BIOSCAN

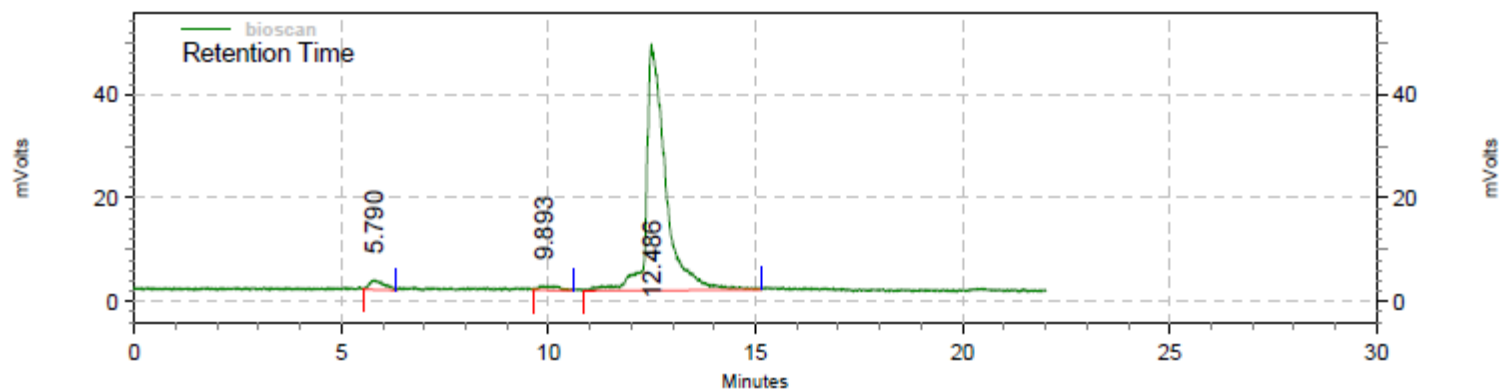

## bioscan Results

| Retention Time | Area           | Area %        | Height       | Height %      |
|----------------|----------------|---------------|--------------|---------------|
| 5.790          | 47058          | 2.92          | 1956         | 3.88          |
| 9.893          | 26421          | 1.64          | 887          | 1.76          |
| 12.486         | 1540366        | 95.45         | 47597        | 94.36         |
| <b>Totals</b>  | <b>1613845</b> | <b>100.00</b> | <b>50440</b> | <b>100.00</b> |



<sup>64</sup>Cu -NO2A-cysVar3

Table S11-1. Tissue uptake (mean %ID ± SD) of <sup>64</sup>Cu-NO2A-cysVar3 administered via the lateral tail vein in female, BALB/c mice with orthotopic 4T1 breast cancer allografts implanted into the mammary fat pad.

| Tissue       | 1 h (n=5) |        | 2 h (n=5) |        | 4 h (n=5) |        | 4 h + glucose (n=5) |        | 12 h (n=5) |        | 24 h (n=8) |        | 36 h (n=3) |        | 48 h (n=4) |        |
|--------------|-----------|--------|-----------|--------|-----------|--------|---------------------|--------|------------|--------|------------|--------|------------|--------|------------|--------|
| Blood        | 9.25      | ± 4.66 | 4.14      | ± 3.47 | 3.61      | ± 3.04 | 2.67                | ± 1.31 | 1.56       | ± 0.41 | 2.82       | ± 0.85 | 1.10       | ± 0.24 | 0.64       | ± 0.07 |
| Heart        | 0.76      | ± 0.11 | 0.70      | ± 0.13 | 0.59      | ± 0.07 | 0.70                | ± 0.09 | 0.48       | ± 0.06 | 0.49       | ± 0.06 | 0.45       | ± 0.02 | 0.48       | ± 0.04 |
| Lungs        | 6.41      | ± 1.03 | 4.28      | ± 1.18 | 4.44      | ± 0.18 | 3.74                | ± 1.28 | 1.90       | ± 0.50 | 1.39       | ± 0.17 | 1.51       | ± 0.11 | 1.12       | ± 0.10 |
| Liver        | 11.9      | ± 0.47 | 10.3      | ± 1.55 | 10.5      | ± 1.03 | 12.5                | ± 2.43 | 10.6       | ± 0.66 | 12.3       | ± 1.75 | 14.5       | ± 0.14 | 13.5       | ± 0.35 |
| Spleen       | 0.37      | ± 0.02 | 0.40      | ± 0.03 | 0.41      | ± 0.05 | 0.45                | ± 0.08 | 0.42       | ± 0.05 | 0.55       | ± 0.08 | 0.73       | ± 0.17 | 0.68       | ± 0.13 |
| Pancreas     | 0.46      | ± 0.04 | 0.38      | ± 0.05 | 0.37      | ± 0.07 | 0.36                | ± 0.03 | 0.29       | ± 0.01 | 0.40       | ± 0.07 | 0.42       | ± 0.03 | 0.43       | ± 0.06 |
| Stomach      | 0.56      | ± 0.07 | 0.55      | ± 0.07 | 0.61      | ± 0.08 | 0.54                | ± 0.11 | 0.86       | ± 0.15 | 0.97       | ± 0.20 | 1.01       | ± 0.02 | 1.17       | ± 0.13 |
| S. intestine | 4.32      | ± 0.35 | 3.65      | ± 0.52 | 4.31      | ± 0.40 | 3.78                | ± 0.79 | 5.44       | ± 0.38 | 5.47       | ± 0.75 | 5.26       | ± 0.21 | 4.90       | ± 0.31 |
| L. intestine | 1.32      | ± 0.19 | 1.77      | ± 0.16 | 2.45      | ± 0.16 | 2.29                | ± 0.36 | 3.66       | ± 0.20 | 5.44       | ± 0.87 | 4.11       | ± 0.04 | 5.50       | ± 0.43 |
| Kidneys      | 6.92      | ± 0.17 | 7.45      | ± 0.44 | 8.52      | ± 0.69 | 8.13                | ± 0.80 | 6.05       | ± 0.60 | 3.98       | ± 0.52 | 3.94       | ± 0.20 | 3.15       | ± 0.21 |
| Muscle       | 0.11      | ± 0.04 | 0.13      | ± 0.02 | 0.15      | ± 0.01 | 0.14                | ± 0.03 | 0.12       | ± 0.04 | 0.11       | ± 0.04 | 0.12       | ± 0.03 | 0.09       | ± 0.03 |
| Bone         | 0.07      | ± 0.03 | 0.05      | ± 0.02 | 0.04      | ± 0.01 | 0.05                | ± 0.03 | 0.13       | ± 0.06 | 0.08       | ± 0.05 | 0.09       | ± 0.00 | 0.09       | ± 0.04 |
| Skin         | 0.37      | ± 0.04 | 0.46      | ± 0.11 | 0.64      | ± 0.21 | 0.44                | ± 0.13 | 0.43       | ± 0.08 | 0.33       | ± 0.12 | 0.28       | ± 0.05 | 0.30       | ± 0.06 |
| Brain        | 0.20      | ± 0.04 | 0.18      | ± 0.04 | 0.13      | ± 0.03 | 0.17                | ± 0.02 | 0.17       | ± 0.03 | 0.16       | ± 0.02 | 0.20       | ± 0.01 | 0.22       | ± 0.02 |
| Tumor        | 0.19      | ± 0.05 | 0.32      | ± 0.09 | 0.53      | ± 0.15 | 0.56                | ± 0.12 | 1.12       | ± 0.41 | 1.67       | ± 0.87 | 2.37       | ± 0.49 | 2.18       | ± 0.33 |

Table S11-2. Tissue uptake (mean %ID/g ± SD) of <sup>64</sup>Cu-NO2A-cysVar3 administered via the lateral tail vein in female, BALB/c mice with orthotopic 4T1 breast cancer allografts implanted into the mammary fat pad.

| Tissue       | 1 h (n=5) |        | 2 h (n=5) |        | 4 h (n=5) |        | 4 h + glucose (n=5) |        | 12 h (n=5) |        | 24 h (n=8) |        | 36 h (n=3) |        | 48 h (n=4) |        |
|--------------|-----------|--------|-----------|--------|-----------|--------|---------------------|--------|------------|--------|------------|--------|------------|--------|------------|--------|
| Blood        | 27.8      | ± 2.54 | 20.0      | ± 2.25 | 15.4      | ± 1.76 | 23.2                | ± 4.10 | 9.88       | ± 1.30 | 6.77       | ± 0.41 | 4.13       | ± 0.51 | 3.34       | ± 0.80 |
| Heart        | 8.24      | ± 1.29 | 6.48      | ± 1.03 | 5.12      | ± 0.63 | 7.26                | ± 1.26 | 4.42       | ± 0.54 | 4.80       | ± 0.50 | 4.37       | ± 0.29 | 5.10       | ± 0.72 |
| Lungs        | 24.6      | ± 3.62 | 16.0      | ± 2.56 | 14.7      | ± 0.93 | 17.7                | ± 4.09 | 8.17       | ± 1.08 | 7.74       | ± 0.95 | 6.19       | ± 0.41 | 7.51       | ± 1.45 |
| Liver        | 14.1      | ± 0.86 | 11.4      | ± 1.57 | 10.4      | ± 0.63 | 14.3                | ± 2.63 | 10.3       | ± 1.66 | 13.6       | ± 1.58 | 13.0       | ± 0.40 | 16.2       | ± 2.35 |
| Spleen       | 4.09      | ± 0.45 | 3.39      | ± 0.22 | 3.45      | ± 0.35 | 5.19                | ± 0.86 | 4.32       | ± 0.62 | 5.07       | ± 0.40 | 5.85       | ± 0.37 | 4.90       | ± 0.29 |
| Pancreas     | 3.27      | ± 0.39 | 2.36      | ± 0.15 | 2.31      | ± 0.25 | 3.04                | ± 0.28 | 2.46       | ± 0.34 | 2.68       | ± 0.25 | 2.92       | ± 0.11 | 3.24       | ± 0.26 |
| Stomach      | 2.24      | ± 0.41 | 2.04      | ± 0.35 | 1.27      | ± 0.35 | 1.84                | ± 0.35 | 1.09       | ± 0.25 | 3.09       | ± 1.19 | 1.56       | ± 0.06 | 3.39       | ± 1.03 |
| S. intestine | 3.48      | ± 0.29 | 2.98      | ± 0.38 | 2.68      | ± 0.24 | 3.49                | ± 0.61 | 3.92       | ± 0.36 | 4.91       | ± 0.64 | 4.14       | ± 0.17 | 5.37       | ± 0.15 |
| L. intestine | 2.02      | ± 0.29 | 2.08      | ± 0.12 | 2.99      | ± 0.20 | 3.68                | ± 0.62 | 4.31       | ± 0.62 | 6.69       | ± 1.33 | 4.77       | ± 0.07 | 7.52       | ± 0.67 |
| Kidneys      | 25.3      | ± 1.99 | 23.1      | ± 1.42 | 24.0      | ± 2.78 | 33.1                | ± 6.29 | 20.5       | ± 2.44 | 13.3       | ± 1.14 | 12.4       | ± 0.63 | 10.6       | ± 1.84 |
| Muscle       | 1.19      | ± 0.10 | 1.03      | ± 0.10 | 1.10      | ± 0.15 | 1.39                | ± 0.28 | 1.30       | ± 0.18 | 1.20       | ± 0.13 | 1.06       | ± 0.18 | 1.01       | ± 0.23 |
| Bone         | 2.26      | ± 0.29 | 1.18      | ± 0.22 | 1.10      | ± 0.14 | 1.88                | ± 0.42 | 2.36       | ± 0.31 | 1.78       | ± 0.23 | 2.10       | ± 0.10 | 1.88       | ± 0.30 |
| Skin         | 2.62      | ± 0.14 | 2.63      | ± 0.49 | 3.43      | ± 0.34 | 3.27                | ± 0.62 | 3.45       | ± 0.54 | 3.17       | ± 0.25 | 2.83       | ± 0.11 | 2.93       | ± 0.58 |

|                                         |             |             |             |             |             |             |             |             |
|-----------------------------------------|-------------|-------------|-------------|-------------|-------------|-------------|-------------|-------------|
| <b>Brain</b>                            | 0.63 ± 0.09 | 0.48 ± 0.09 | 0.35 ± 0.07 | 0.54 ± 0.07 | 0.42 ± 0.08 | 0.42 ± 0.03 | 0.49 ± 0.03 | 0.57 ± 0.08 |
| <b>Tumor</b>                            | 4.19 ± 0.65 | 5.43 ± 0.93 | 8.21 ± 0.86 | 8.81 ± 1.78 | 14.5 ± 2.45 | 19.6 ± 2.34 | 19.2 ± 1.88 | 16.2 ± 1.90 |
| <b>Tumor-to-tissue ratios (rel. u.)</b> |             |             |             |             |             |             |             |             |
| <b>Tumor/Blood</b>                      | 0.15 ± 0.03 | 0.27 ± 0.06 | 0.53 ± 0.08 | 0.38 ± 0.10 | 1.5 ± 0.3   | 2.9 ± 0.4   | 4.7 ± 0.7   | 4.8 ± 1.3   |
| <b>Tumor/Liver</b>                      | 0.30 ± 0.05 | 0.47 ± 0.10 | 0.79 ± 0.10 | 0.61 ± 0.17 | 1.4 ± 0.3   | 1.4 ± 0.2   | 1.47 ± 0.15 | 1.00 ± 0.19 |
| <b>Tumor/S. I.</b>                      | 1.2 ± 0.2   | 1.8 ± 0.4   | 3.1 ± 0.4   | 2.5 ± 0.7   | 3.7 ± 0.7   | 4.0 ± 0.7   | 4.6 ± 0.5   | 3.0 ± 0.4   |
| <b>Tumor/L. I.</b>                      | 2.1 ± 0.4   | 2.6 ± 0.5   | 2.7 ± 0.3   | 2.4 ± 0.6   | 3.4 ± 0.7   | 2.9 ± 0.7   | 4.0 ± 0.4   | 2.2 ± 0.3   |
| <b>Tumor/Kidney</b>                     | 0.17 ± 0.03 | 0.23 ± 0.04 | 0.34 ± 0.05 | 0.27 ± 0.07 | 0.71 ± 0.15 | 1.5 ± 0.2   | 1.55 ± 0.17 | 1.5 ± 0.3   |
| <b>Tumor/Muscle</b>                     | 3.5 ± 0.6   | 5.3 ± 1.0   | 7.4 ± 1.3   | 6.3 ± 1.8   | 11 ± 2      | 16 ± 3      | 18 ± 3      | 16 ± 4      |
| <b>Tumor/Bone</b>                       | 1.9 ± 0.4   | 4.6 ± 1.2   | 7.4 ± 1.2   | 4.7 ± 1.4   | 6.2 ± 1.3   | 11.0 ± 1.9  | 9.1 ± 1.0   | 8.6 ± 1.7   |

### <sup>64</sup>Cu-NO2A-cysVar3

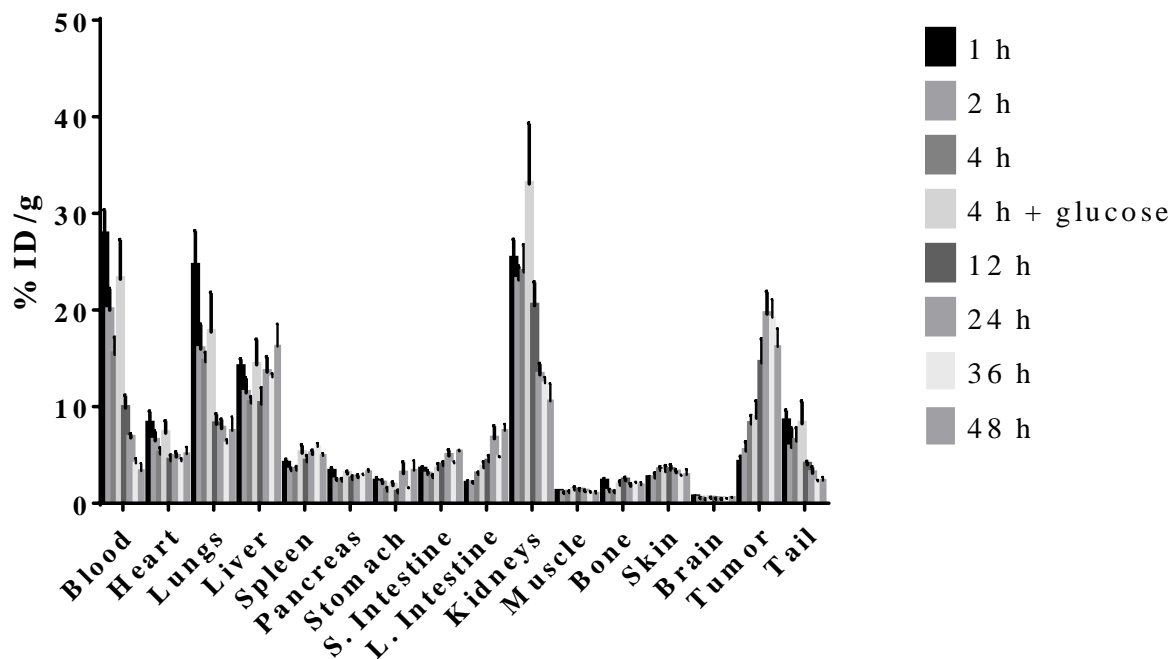

Fig. S11-1. Tissue uptake (mean %ID/g ± SD) of <sup>64</sup>Cu-NO2A-cysVar3 (n = 3-8) administered via the lateral tail vein in female, BALB/c mice with orthotopic 4T1 breast cancer allografts implanted into the mammary fat pad full graph from text. Glucose was administered i.p. 30 min prior to tracer injection.

HPLC Chromatogram of the Reconstituted <sup>64</sup>Cu –NO<sub>2</sub>A-cysVar3 Injectate

**BIOSCAN**

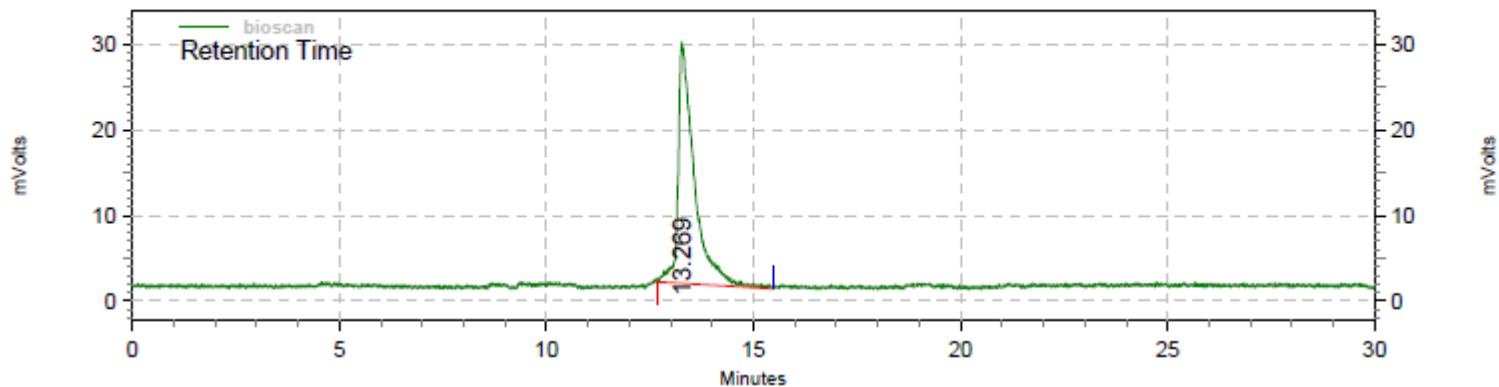

**bioscan Results**

| Retention Time | Area   | Area % | Height | Height % |
|----------------|--------|--------|--------|----------|
| 13.269         | 763889 | 100.00 | 28222  | 100.00   |

|        |        |        |       |        |
|--------|--------|--------|-------|--------|
| Totals | 763889 | 100.00 | 28222 | 100.00 |
|--------|--------|--------|-------|--------|

*<sup>18</sup>F-AIF-NO2A-cysVar3*

Table S12-1. Tissue uptake (mean %ID ± SD) of <sup>18</sup>F-AIF-NO2A-cysVar3 administered via the lateral tail vein in female, BALB/c mice with orthotopic 4T1 breast cancer allografts implanted into the mammary fat pad.

| Tissue       | 0.5 h (n=5) | 1 h (n=5)   | 2 h (n=5)   | 4 h (n=10)  | 4 h + glucose (n=4) | 6 h (n=5)   | 8 h (n=5)   |
|--------------|-------------|-------------|-------------|-------------|---------------------|-------------|-------------|
| Blood        | 5.50 ± 3.19 | 9.36 ± 8.75 | 2.96 ± 1.05 | 5.81 ± 2.46 | 3.71 ± 1.51         | 2.46 ± 0.99 | 4.71 ± 2.12 |
| Heart        | 1.26 ± 0.16 | 1.08 ± 0.23 | 0.82 ± 0.16 | 0.63 ± 0.12 | 0.66 ± 0.26         | 0.54 ± 0.08 | 0.55 ± 0.06 |
| Lungs        | 11.2 ± 0.83 | 8.53 ± 2.35 | 7.02 ± 0.94 | 2.27 ± 1.04 | 3.98 ± 1.98         | 3.55 ± 0.64 | 1.06 ± 0.18 |
| Liver        | 11.7 ± 1.93 | 12.1 ± 0.61 | 9.57 ± 1.32 | 8.00 ± 0.96 | 6.79 ± 2.07         | 7.91 ± 0.46 | 7.14 ± 0.67 |
| Spleen       | 0.58 ± 0.03 | 0.49 ± 0.03 | 0.41 ± 0.02 | 0.45 ± 0.12 | 0.31 ± 0.09         | 0.36 ± 0.03 | 0.51 ± 0.05 |
| Pancreas     | 0.70 ± 0.11 | 0.49 ± 0.18 | 0.41 ± 0.05 | 0.38 ± 0.08 | 0.26 ± 0.05         | 0.32 ± 0.02 | 0.26 ± 0.03 |
| Stomach      | 0.91 ± 0.25 | 0.55 ± 0.08 | 0.53 ± 0.08 | 0.52 ± 0.06 | 0.38 ± 0.13         | 0.49 ± 0.09 | 0.44 ± 0.06 |
| S. intestine | 3.33 ± 0.44 | 3.91 ± 0.71 | 3.47 ± 0.69 | 2.09 ± 0.30 | 2.29 ± 0.66         | 1.90 ± 0.12 | 2.28 ± 0.12 |
| L. intestine | 1.57 ± 0.17 | 1.48 ± 0.08 | 1.50 ± 0.28 | 1.67 ± 0.61 | 1.54 ± 0.58         | 1.48 ± 0.31 | 1.10 ± 0.11 |
| Kidneys      | 6.69 ± 0.67 | 8.56 ± 0.50 | 11.2 ± 0.61 | 10.1 ± 1.35 | 12.2 ± 2.88         | 10.6 ± 0.51 | 15.3 ± 1.74 |
| Muscle       | 0.13 ± 0.05 | 0.16 ± 0.03 | 0.11 ± 0.03 | 0.16 ± 0.04 | 0.09 ± 0.05         | 0.15 ± 0.02 | 0.19 ± 0.07 |
| Bone         | 0.14 ± 0.04 | 0.06 ± 0.03 | 0.12 ± 0.08 | 0.08 ± 0.06 | 0.07 ± 0.01         | 0.11 ± 0.01 | 0.11 ± 0.00 |
| Skin         | 0.28 ± 0.09 | 0.42 ± 0.08 | 0.61 ± 0.16 | 0.29 ± 0.16 | 0.37 ± 0.12         | 0.36 ± 0.11 | 0.31 ± 0.07 |
| Brain        | 0.34 ± 0.05 | 0.22 ± 0.02 | 0.21 ± 0.04 | 0.17 ± 0.05 | 0.12 ± 0.03         | 0.17 ± 0.03 | 0.19 ± 0.05 |
| Tumor        | 0.29 ± 0.09 | 0.33 ± 0.06 | 0.47 ± 0.11 | 0.79 ± 0.22 | 0.56 ± 0.20         | 1.13 ± 0.21 | 1.97 ± 0.99 |

Table S12-2. Tissue uptake (mean %ID/g ± SD) of <sup>18</sup>F-AIF-NO2A-cysVar3 administered via the lateral tail vein in female, BALB/c mice with orthotopic 4T1 breast cancer allografts implanted into the mammary fat pad.

| Tissue       | 0.5 h (n=5) | 1 h (n=5)   | 2 h (n=5)   | 4 h (n=10)  | 4 h + glucose (n=4) | 6 h (n=5)   | 8 h (n=5)   |
|--------------|-------------|-------------|-------------|-------------|---------------------|-------------|-------------|
| Blood        | 35.0 ± 2.37 | 32.3 ± 2.37 | 22.3 ± 2.67 | 20.8 ± 1.88 | 15.5 ± 2.06         | 16.5 ± 1.68 | 16.1 ± 1.87 |
| Heart        | 10.7 ± 0.82 | 9.41 ± 1.13 | 7.02 ± 0.87 | 6.29 ± 1.03 | 5.60 ± 0.89         | 5.37 ± 0.62 | 5.91 ± 0.44 |
| Lungs        | 36.3 ± 4.37 | 28.3 ± 3.61 | 22.2 ± 2.94 | 11.8 ± 3.79 | 16.6 ± 1.35         | 13.7 ± 1.97 | 7.03 ± 0.53 |
| Liver        | 12.6 ± 0.55 | 12.9 ± 0.55 | 9.58 ± 1.52 | 9.06 ± 1.24 | 8.01 ± 1.18         | 8.85 ± 0.69 | 8.80 ± 0.25 |
| Spleen       | 4.99 ± 0.30 | 4.00 ± 0.12 | 3.56 ± 0.35 | 3.73 ± 0.66 | 2.91 ± 0.35         | 3.36 ± 0.23 | 4.47 ± 0.60 |
| Pancreas     | 3.90 ± 0.35 | 3.35 ± 0.30 | 2.49 ± 0.25 | 2.44 ± 0.20 | 1.87 ± 0.15         | 2.17 ± 0.20 | 2.09 ± 0.27 |
| Stomach      | 1.92 ± 0.44 | 1.68 ± 0.23 | 1.31 ± 0.16 | 1.29 ± 0.62 | 1.11 ± 0.37         | 1.36 ± 0.43 | 0.86 ± 0.23 |
| S. intestine | 2.89 ± 0.22 | 3.24 ± 0.23 | 2.39 ± 0.25 | 2.06 ± 0.28 | 1.78 ± 0.23         | 1.79 ± 0.12 | 2.19 ± 0.29 |
| L. intestine | 1.76 ± 0.17 | 2.14 ± 0.10 | 2.05 ± 0.21 | 2.07 ± 0.63 | 2.05 ± 0.40         | 2.04 ± 0.41 | 1.57 ± 0.26 |
| Kidneys      | 18.7 ± 1.45 | 26.2 ± 2.11 | 33.7 ± 3.00 | 34.3 ± 6.91 | 41.0 ± 1.54         | 35.2 ± 1.25 | 53.0 ± 6.26 |
| Muscle       | 1.01 ± 0.15 | 1.23 ± 0.09 | 1.07 ± 0.14 | 1.55 ± 0.27 | 0.99 ± 0.39         | 1.47 ± 0.17 | 1.61 ± 0.39 |
| Bone         | 2.14 ± 0.21 | 1.65 ± 0.31 | 1.81 ± 0.54 | 1.66 ± 0.61 | 1.44 ± 0.15         | 2.32 ± 0.12 | 2.37 ± 0.17 |
| Skin         | 2.17 ± 0.21 | 2.63 ± 0.23 | 3.06 ± 0.39 | 2.92 ± 0.71 | 2.70 ± 0.45         | 3.73 ± 0.34 | 3.37 ± 0.20 |
| Brain        | 0.85 ± 0.05 | 0.60 ± 0.05 | 0.51 ± 0.07 | 0.52 ± 0.14 | 0.34 ± 0.06         | 0.41 ± 0.07 | 0.47 ± 0.11 |
| Tumor        | 4.35 ± 0.25 | 6.05 ± 0.63 | 7.42 ± 0.69 | 10.6 ± 2.26 | 9.09 ± 1.69         | 13.9 ± 1.37 | 13.9 ± 2.17 |

| Tumor-to-tissue ratios (rel. u.) |               |             |             |             |             |             |             |
|----------------------------------|---------------|-------------|-------------|-------------|-------------|-------------|-------------|
| <b>Tumor/Blood</b>               | 0.124 ± 0.011 | 0.19 ± 0.02 | 0.33 ± 0.05 | 0.51 ± 0.12 | 0.59 ± 0.13 | 0.85 ± 0.12 | 0.86 ± 0.17 |
| <b>Tumor/Liver</b>               | 0.35 ± 0.02   | 0.47 ± 0.05 | 0.78 ± 0.14 | 1.2 ± 0.3   | 1.1 ± 0.3   | 1.6 ± 0.2   | 1.6 ± 0.3   |
| <b>Tumor/S. I.</b>               | 1.51 ± 0.14   | 1.9 ± 0.2   | 3.1 ± 0.4   | 5.1 ± 1.3   | 5.1 ± 1.2   | 7.8 ± 0.9   | 6.3 ± 1.3   |
| <b>Tumor/L. I.</b>               | 2.5 ± 0.3     | 2.8 ± 0.3   | 3.6 ± 0.5   | 5.1 ± 1.9   | 4.4 ± 1.2   | 6.8 ± 1.5   | 9 ± 2       |
| <b>Tumor/Kidney</b>              | 0.23 ± 0.02   | 0.23 ± 0.03 | 0.22 ± 0.03 | 0.31 ± 0.09 | 0.22 ± 0.04 | 0.40 ± 0.04 | 0.26 ± 0.05 |
| <b>Tumor/Muscle</b>              | 4.3 ± 0.7     | 4.9 ± 0.6   | 6.9 ± 1.1   | 6.9 ± 1.9   | 9 ± 4       | 9.5 ± 1.4   | 9 ± 2       |
| <b>Tumor/Bone</b>                | 2.0 ± 0.2     | 3.7 ± 0.8   | 4.1 ± 1.3   | 6 ± 3       | 6.3 ± 1.4   | 6.0 ± 0.7   | 5.9 ± 1.0   |

**<sup>18</sup>F-AIF-NO<sub>2</sub>A-cysVar3**

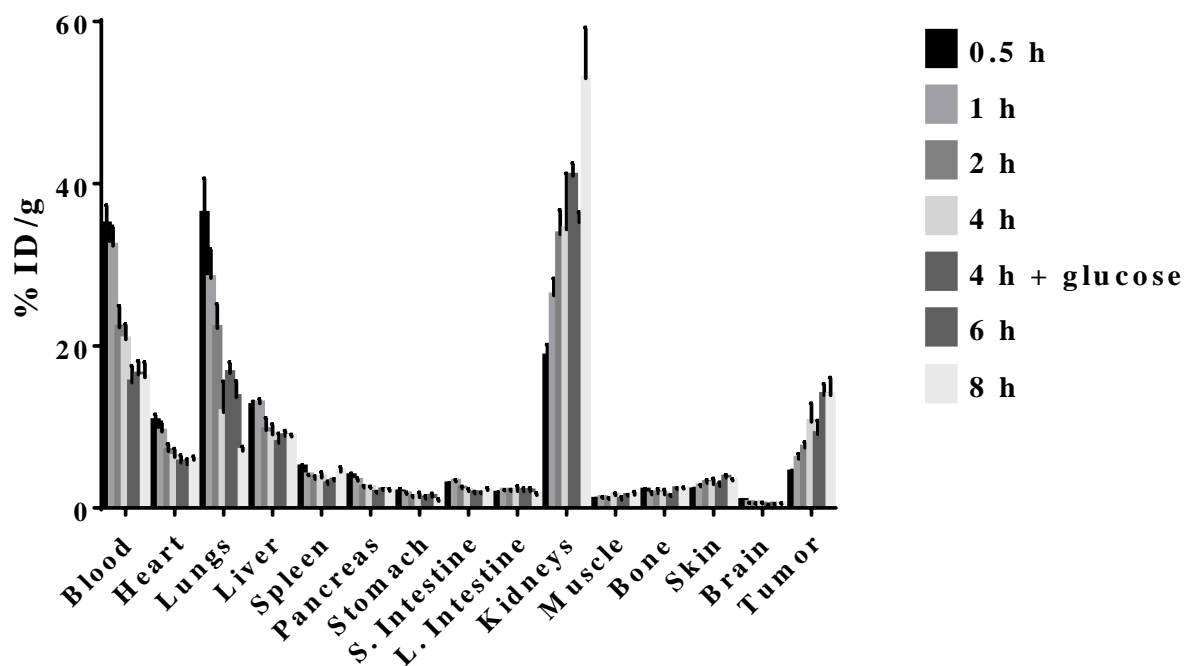

Fig. S12-1. Tissue uptake (mean %ID/g ± SD) of <sup>18</sup>F-AIF-NO<sub>2</sub>A-cysVar3 (n = 4-10) administered via the lateral tail vein in female, BALB/c mice with orthotopic 4T1 breast cancer allografts implanted into the mammary fat pad full graph from text. Glucose was administered i.p. 30 min prior to tracer injection.

HPLC Chromatogram of the Reconstituted <sup>18</sup>F-AIF-NO2A-cysVar3 Injectate

**BIOSCAN**

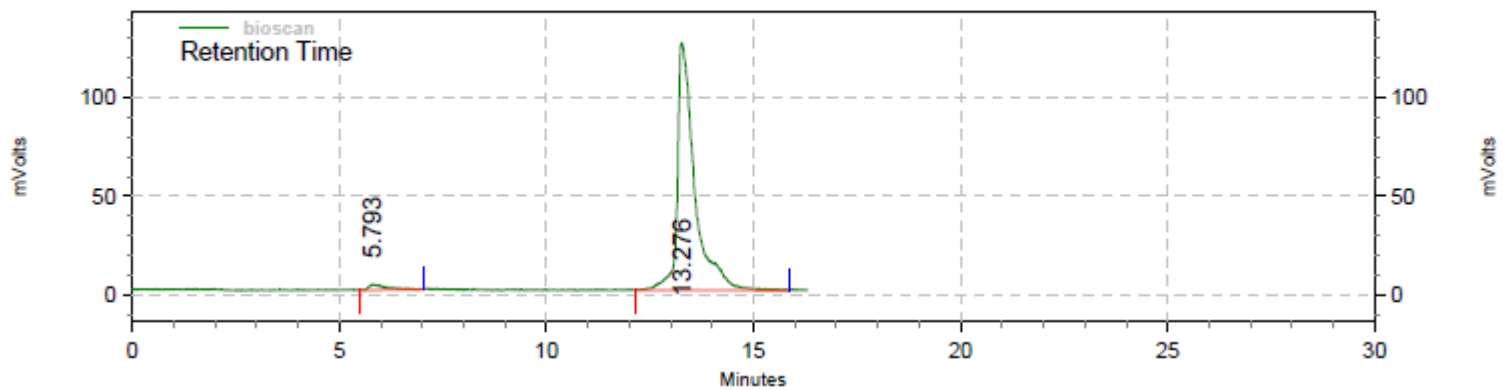

**bioscan Results**

| Retention Time | Area           | Area %        | Height        | Height %      |
|----------------|----------------|---------------|---------------|---------------|
| 5.793          | 90241          | 2.40          | 3006          | 2.33          |
| 13.276         | 3669746        | 97.60         | 125746        | 97.67         |
| <b>Totals</b>  | <b>3759987</b> | <b>100.00</b> | <b>128752</b> | <b>100.00</b> |

**Data from lead tracers in other tumor models:**

*<sup>64</sup>Cu-NO2A-cysVar3 in PC3 tumor-bearing male nude mice*

Table S13-1. Tissue uptake (mean %ID ± SD) of <sup>64</sup>Cu-NO2A-cysVar3 administered via the lateral tail vein in male, nude mice with shoulder PC3 (prostate cancer) xenografts.

| Tissue       | 1 h (n=8)   | 4 h (n=8)   | 12 h (n=8)  | 24 h (n=8)  | 48 h (n=8)  |
|--------------|-------------|-------------|-------------|-------------|-------------|
| Blood        | 18.3 ± 3.05 | 10.1 ± 3.52 | 3.98 ± 1.12 | 2.30 ± 0.82 | 0.55 ± 0.21 |
| Heart        | 0.80 ± 0.12 | 0.81 ± 0.28 | 0.66 ± 0.10 | 0.49 ± 0.08 | 0.41 ± 0.04 |
| Lungs        | 2.09 ± 0.34 | 1.68 ± 0.36 | 1.29 ± 0.44 | 1.20 ± 0.18 | 0.90 ± 0.10 |
| Liver        | 10.1 ± 1.67 | 11.6 ± 0.97 | 14.0 ± 2.35 | 16.7 ± 3.53 | 12.9 ± 1.90 |
| Spleen       | 0.33 ± 0.05 | 0.33 ± 0.04 | 0.26 ± 0.04 | 0.29 ± 0.07 | 0.22 ± 0.03 |
| Pancreas     | 0.37 ± 0.05 | 0.30 ± 0.03 | 0.27 ± 0.02 | 0.31 ± 0.04 | 0.25 ± 0.05 |
| Stomach      | 0.56 ± 0.12 | 0.72 ± 0.06 | 0.93 ± 0.17 | 1.09 ± 0.29 | 1.12 ± 0.26 |
| S. intestine | 3.20 ± 1.01 | 3.69 ± 0.28 | 4.98 ± 0.75 | 6.06 ± 0.90 | 4.52 ± 0.67 |
| L. intestine | 1.38 ± 0.24 | 2.43 ± 0.66 | 3.96 ± 0.31 | 7.69 ± 1.23 | 7.83 ± 1.28 |
| Kidneys      | 7.74 ± 2.26 | 8.61 ± 1.42 | 7.29 ± 0.98 | 5.43 ± 0.62 | 4.05 ± 0.48 |
| Muscle       | 0.16 ± 0.03 | 0.15 ± 0.02 | 0.13 ± 0.04 | 0.12 ± 0.03 | 0.10 ± 0.03 |
| Bone         | 0.07 ± 0.02 | 0.10 ± 0.07 | 0.10 ± 0.01 | 0.10 ± 0.04 | 0.08 ± 0.01 |
| Skin         | 0.68 ± 0.37 | 0.85 ± 0.28 | 0.63 ± 0.20 | 0.66 ± 0.22 | 0.42 ± 0.11 |
| Tumor        | 0.78 ± 0.30 | 1.04 ± 0.49 | 1.55 ± 0.71 | 2.34 ± 0.86 | 2.42 ± 0.78 |

Table S13-2. Tissue uptake (mean %ID/g ± SD) of <sup>64</sup>Cu-NO2A-cysVar3 administered via the lateral tail vein in male, nude mice with shoulder PC3 (prostate cancer) xenografts.

| Tissue                                  | 1 h (n=8)   | 4 h (n=8)   | 12 h (n=8)  | 24 h (n=8)  | 48 h (n=8)  |
|-----------------------------------------|-------------|-------------|-------------|-------------|-------------|
| Blood                                   | 22.0 ± 2.88 | 15.6 ± 2.21 | 7.51 ± 1.77 | 5.12 ± 0.77 | 2.48 ± 0.24 |
| Heart                                   | 6.50 ± 0.80 | 5.71 ± 1.21 | 3.79 ± 0.82 | 3.32 ± 0.46 | 3.44 ± 0.26 |
| Lungs                                   | 10.7 ± 1.66 | 8.63 ± 1.01 | 5.85 ± 0.89 | 5.69 ± 0.51 | 4.37 ± 0.57 |
| Liver                                   | 8.38 ± 1.34 | 9.74 ± 1.10 | 9.66 ± 1.35 | 12.4 ± 2.39 | 11.1 ± 1.84 |
| Spleen                                  | 3.42 ± 0.25 | 3.17 ± 0.27 | 2.96 ± 0.54 | 3.39 ± 0.25 | 3.06 ± 0.31 |
| Pancreas                                | 2.38 ± 0.40 | 2.02 ± 0.19 | 1.68 ± 0.31 | 1.74 ± 0.17 | 1.62 ± 0.21 |
| Stomach                                 | 1.46 ± 0.44 | 1.41 ± 0.50 | 1.30 ± 0.39 | 1.56 ± 0.41 | 2.18 ± 0.35 |
| S. intestine                            | 2.02 ± 0.55 | 2.34 ± 0.38 | 2.22 ± 0.29 | 2.94 ± 0.36 | 3.08 ± 0.17 |
| L. intestine                            | 0.72 ± 0.17 | 1.34 ± 0.48 | 1.80 ± 0.23 | 3.13 ± 0.48 | 3.26 ± 0.18 |
| Kidneys                                 | 16.1 ± 4.73 | 17.5 ± 2.72 | 13.9 ± 1.20 | 10.9 ± 1.11 | 8.88 ± 0.68 |
| Muscle                                  | 1.13 ± 0.15 | 1.21 ± 0.11 | 1.05 ± 0.20 | 0.90 ± 0.09 | 0.81 ± 0.15 |
| Bone                                    | 1.86 ± 0.31 | 1.71 ± 0.26 | 1.54 ± 0.26 | 1.61 ± 0.16 | 1.41 ± 0.15 |
| Skin                                    | 2.80 ± 0.73 | 4.39 ± 0.84 | 3.67 ± 0.69 | 3.37 ± 0.37 | 2.60 ± 0.42 |
| Tumor                                   | 3.16 ± 0.49 | 4.61 ± 0.82 | 5.58 ± 1.12 | 6.60 ± 0.76 | 6.32 ± 0.81 |
| <b>Tumor-to-tissue ratios (rel. u.)</b> |             |             |             |             |             |
| Tumor/Blood                             | 0.14 ± 0.03 | 0.29 ± 0.07 | 0.7 ± 0.2   | 1.3 ± 0.2   | 2.6 ± 0.4   |
| Tumor/Liver                             | 0.38 ± 0.08 | 0.47 ± 0.10 | 0.58 ± 0.14 | 0.53 ± 0.12 | 0.57 ± 0.12 |
| Tumor/S. I.                             | 1.6 ± 0.5   | 2.0 ± 0.5   | 2.5 ± 0.6   | 2.2 ± 0.4   | 2.1 ± 0.3   |
| Tumor/L. I.                             | 4.4 ± 1.2   | 3.4 ± 1.4   | 3.1 ± 0.7   | 2.1 ± 0.4   | 1.9 ± 0.3   |
| Tumor/Kidney                            | 0.20 ± 0.07 | 0.26 ± 0.06 | 0.40 ± 0.09 | 0.61 ± 0.09 | 0.71 ± 0.11 |
| Tumor/Muscle                            | 2.8 ± 0.6   | 3.8 ± 0.8   | 5.3 ± 1.5   | 7.3 ± 1.1   | 7.8 ± 1.8   |
| Tumor/Bone                              | 1.7 ± 0.4   | 2.7 ± 0.6   | 3.6 ± 0.9   | 4.1 ± 0.6   | 4.5 ± 0.7   |

*<sup>64</sup>Cu-NO2A-cysVar3 in LNCaP tumor-bearing male nude mice*

Table S13-3. Tissue uptake (mean %ID ± SD) of <sup>64</sup>Cu-NO2A-cysVar3 administered via the lateral tail vein in male, nude mice with shoulder LNCaP (prostate cancer) xenografts.

| Tissue       | 1 h (n=8) |        | 4 h (n=8) |        | 12 h (n=8) |        | 24 h (n=8) |        | 48 h (n=11) |        |
|--------------|-----------|--------|-----------|--------|------------|--------|------------|--------|-------------|--------|
| Blood        | 12.3      | ± 5.56 | 11.1      | ± 3.10 | 3.77       | ± 1.21 | 4.29       | ± 1.48 | 1.42        | ± 0.55 |
| Heart        | 0.94      | ± 0.27 | 0.84      | ± 0.29 | 0.56       | ± 0.12 | 0.54       | ± 0.11 | 0.38        | ± 0.06 |
| Lungs        | 2.50      | ± 0.60 | 1.94      | ± 0.49 | 1.33       | ± 0.32 | 1.25       | ± 0.40 | 0.71        | ± 0.12 |
| Liver        | 10.6      | ± 1.85 | 10.1      | ± 2.02 | 13.0       | ± 2.07 | 14.5       | ± 2.77 | 10.2        | ± 3.13 |
| Spleen       | 0.34      | ± 0.07 | 0.26      | ± 0.04 | 0.30       | ± 0.06 | 0.35       | ± 0.09 | 0.25        | ± 0.09 |
| Pancreas     | 0.42      | ± 0.05 | 0.32      | ± 0.06 | 0.25       | ± 0.04 | 0.33       | ± 0.05 | 0.26        | ± 0.05 |
| Stomach      | 0.62      | ± 0.21 | 0.77      | ± 0.13 | 0.86       | ± 0.30 | 1.34       | ± 0.28 | 0.95        | ± 0.26 |
| S. intestine | 3.29      | ± 0.54 | 3.99      | ± 1.00 | 4.15       | ± 0.64 | 6.92       | ± 1.91 | 4.17        | ± 0.55 |
| L. intestine | 1.37      | ± 0.30 | 1.94      | ± 0.69 | 3.91       | ± 0.71 | 7.40       | ± 2.22 | 5.95        | ± 0.98 |
| Kidneys      | 7.67      | ± 2.14 | 8.46      | ± 2.83 | 7.11       | ± 0.65 | 5.94       | ± 1.57 | 3.44        | ± 0.62 |
| Muscle       | 0.16      | ± 0.04 | 0.13      | ± 0.03 | 0.15       | ± 0.04 | 0.13       | ± 0.05 | 0.08        | ± 0.02 |
| Bone         | 0.07      | ± 0.03 | 0.08      | ± 0.03 | 0.09       | ± 0.02 | 0.08       | ± 0.02 | 0.04        | ± 0.03 |
| Skin         | 0.49      | ± 0.17 | 0.78      | ± 0.34 | 0.58       | ± 0.10 | 0.85       | ± 0.31 | 0.41        | ± 0.22 |
| Tumor        | 0.43      | ± 0.48 | 1.13      | ± 0.99 | 0.50       | ± 0.48 | 2.24       | ± 1.05 | 1.53        | ± 1.67 |

Table S13-4. Tissue uptake (mean %ID/g ± SD) of <sup>64</sup>Cu-NO2A-cysVar3 administered via the lateral tail vein in male, nude mice with shoulder LNCaP (prostate cancer) xenografts.

| Tissue                                  | 1 h (n=8) |        | 4 h (n=8) |        | 12 h (n=8) |        | 24 h (n=8) |        | 48 h (n=11) |        |
|-----------------------------------------|-----------|--------|-----------|--------|------------|--------|------------|--------|-------------|--------|
| Blood                                   | 20.8      | ± 5.81 | 15.3      | ± 3.85 | 6.60       | ± 1.47 | 7.21       | ± 2.52 | 2.56        | ± 0.78 |
| Heart                                   | 6.30      | ± 1.68 | 5.49      | ± 1.25 | 3.09       | ± 0.56 | 4.71       | ± 2.50 | 2.94        | ± 0.48 |
| Lungs                                   | 11.8      | ± 3.01 | 9.27      | ± 2.16 | 5.57       | ± 0.76 | 7.45       | ± 5.42 | 4.17        | ± 0.78 |
| Liver                                   | 8.49      | ± 2.99 | 8.94      | ± 2.51 | 8.22       | ± 1.01 | 13.4       | ± 3.93 | 8.78        | ± 1.16 |
| Spleen                                  | 3.63      | ± 1.58 | 2.99      | ± 0.79 | 2.65       | ± 0.23 | 4.17       | ± 1.31 | 3.39        | ± 0.87 |
| Pancreas                                | 2.30      | ± 0.55 | 1.86      | ± 0.34 | 1.43       | ± 0.13 | 1.89       | ± 0.36 | 1.54        | ± 0.23 |
| Stomach                                 | 1.70      | ± 0.81 | 1.32      | ± 0.44 | 0.96       | ± 0.36 | 1.94       | ± 0.64 | 1.61        | ± 0.56 |
| S. intestine                            | 2.07      | ± 0.42 | 2.11      | ± 0.53 | 1.99       | ± 0.37 | 3.08       | ± 0.81 | 2.40        | ± 0.46 |
| L. intestine                            | 0.72      | ± 0.17 | 0.99      | ± 0.38 | 2.11       | ± 0.58 | 3.65       | ± 0.67 | 3.13        | ± 0.66 |
| Kidneys                                 | 14.9      | ± 6.43 | 16.7      | ± 6.94 | 11.6       | ± 0.66 | 12.9       | ± 5.07 | 7.49        | ± 1.47 |
| Muscle                                  | 1.00      | ± 0.31 | 1.07      | ± 0.21 | 0.87       | ± 0.14 | 1.14       | ± 0.49 | 0.74        | ± 0.19 |
| Bone                                    | 1.87      | ± 1.16 | 1.51      | ± 0.33 | 1.32       | ± 0.14 | 1.67       | ± 0.46 | 1.12        | ± 0.27 |
| Skin                                    | 2.33      | ± 0.59 | 3.72      | ± 0.91 | 3.36       | ± 0.52 | 4.32       | ± 0.87 | 2.42        | ± 0.38 |
| Tumor                                   | 4.09      | ± 1.43 | 6.32      | ± 2.15 | 5.14       | ± 2.65 | 9.47       | ± 3.32 | 6.12        | ± 1.92 |
| <b>Tumor-to-tissue ratios (rel. u.)</b> |           |        |           |        |            |        |            |        |             |        |
| Tumor/Blood                             | 0.20      | ± 0.09 | 0.41      | ± 0.18 | 0.78       | ± 0.44 | 1.31       | ± 0.65 | 2.40        | ± 1.05 |
| Tumor/Liver                             | 0.48      | ± 0.24 | 0.71      | ± 0.31 | 0.62       | ± 0.33 | 0.71       | ± 0.32 | 0.70        | ± 0.24 |
| Tumor/S. I.                             | 1.98      | ± 0.80 | 3.00      | ± 1.27 | 2.59       | ± 1.42 | 3.08       | ± 1.35 | 2.55        | ± 0.94 |
| Tumor/L. I.                             | 5.65      | ± 2.36 | 6.38      | ± 3.27 | 2.43       | ± 1.42 | 2.60       | ± 1.03 | 1.96        | ± 0.74 |
| Tumor/Kidney                            | 0.28      | ± 0.15 | 0.38      | ± 0.20 | 0.44       | ± 0.23 | 0.74       | ± 0.39 | 0.82        | ± 0.30 |
| Tumor/Muscle                            | 4.08      | ± 1.91 | 5.89      | ± 2.30 | 5.92       | ± 3.21 | 8.32       | ± 4.60 | 8.28        | ± 3.33 |
| Tumor/Bone                              | 2.19      | ± 1.56 | 4.19      | ± 1.70 | 3.90       | ± 2.05 | 5.68       | ± 2.52 | 5.48        | ± 2.17 |



*<sup>64</sup>Cu-NO2A-cysVar3 in B16-F10 tumor-bearing female C57Bl/6 mice*

Table S13-5. Tissue uptake (mean %ID ± SD) of <sup>64</sup>Cu-NO2A-cysVar3 administered via the lateral tail vein in female, C57Bl/6 mice with orthotopic B16-F10 (melanoma) allografts.

| Tissue          | 1 h (n=4)   | 4 h (n=3)   | 12 h (n=4)  | 14.5 h (n=3) | 24 h (n=4)  |
|-----------------|-------------|-------------|-------------|--------------|-------------|
| Blood           | 18.6 ± 1.60 | 6.70 ± 1.64 | 3.95 ± 0.65 | 1.05 ± 0.36  | 1.37 ± 0.67 |
| Heart           | 1.28 ± 0.67 | 0.76 ± 0.07 | 0.58 ± 0.08 | 0.63 ± 0.13  | 0.45 ± 0.03 |
| Lungs           | 2.55 ± 0.25 | 2.26 ± 0.43 | 2.58 ± 0.53 | 1.93 ± 0.03  | 1.09 ± 0.17 |
| Liver           | 9.24 ± 1.45 | 9.54 ± 0.50 | 11.1 ± 1.04 | 9.77 ± 0.63  | 11.3 ± 0.74 |
| Spleen          | 0.37 ± 0.09 | 0.32 ± 0.04 | 0.34 ± 0.02 | 0.37 ± 0.09  | 0.35 ± 0.05 |
| Stomach         | 0.77 ± 0.20 | 0.76 ± 0.13 | 1.36 ± 0.95 | 0.78 ± 0.17  | 1.27 ± 0.17 |
| S. intestine    | 4.38 ± 0.94 | 3.94 ± 0.90 | 5.64 ± 0.68 | 4.52 ± 0.66  | 5.16 ± 0.36 |
| L. intestine    | 1.35 ± 0.33 | 2.72 ± 0.42 | 3.44 ± 0.38 | 3.89 ± 0.25  | 6.11 ± 0.27 |
| Kidneys         | 4.54 ± 0.78 | 8.92 ± 0.99 | 8.08 ± 0.88 | 6.61 ± 1.23  | 4.82 ± 0.43 |
| Muscle          | 0.10 ± 0.03 | 0.15 ± 0.05 | 0.15 ± 0.03 | 0.18 ± 0.07  | 0.13 ± 0.05 |
| Bone            | 0.07 ± 0.02 | 0.17 ± 0.02 | 0.13 ± 0.04 | 0.35 ± 0.05  | 0.21 ± 0.08 |
| Skin (ears)     | 0.30 ± 0.19 | 0.33 ± 0.08 | 0.28 ± 0.10 | 0.14 ± 0.01  | 0.36 ± 0.10 |
| Skin (shoulder) | 0.26 ± 0.09 | 0.22 ± 0.03 | 0.26 ± 0.10 | 0.21 ± 0.04  | 0.15 ± 0.03 |
| Tumor           | 2.15 ± 1.37 | 1.45 ± 2.02 | 3.58 ± 2.10 | 1.27 ± 1.95  | 1.61 ± 0.93 |

Table S13-6. Tissue uptake (mean %ID/g ± SD) of <sup>64</sup>Cu-NO2A-cysVar3 administered via the lateral tail vein in female, C57Bl/6 mice with orthotopic B16-F10 (melanoma) allografts.

| Tissue                                  | 1 h (n=4)   | 4 h (n=3)   | 12 h (n=4)  | 14.5 h (n=3) | 24 h (n=4)  |
|-----------------------------------------|-------------|-------------|-------------|--------------|-------------|
| Blood                                   | 28.4 ± 0.74 | 19.5 ± 1.06 | 11.6 ± 1.52 | 12.0 ± 2.14  | 6.37 ± 0.39 |
| Heart                                   | 8.24 ± 0.28 | 6.86 ± 0.52 | 4.55 ± 0.64 | 4.75 ± 0.72  | 4.32 ± 0.41 |
| Lungs                                   | 12.6 ± 1.32 | 11.8 ± 3.38 | 9.94 ± 1.74 | 8.97 ± 1.30  | 5.81 ± 0.59 |
| Liver                                   | 11.1 ± 1.47 | 10.3 ± 0.38 | 8.97 ± 0.68 | 10.1 ± 1.35  | 11.7 ± 1.42 |
| Spleen                                  | 4.24 ± 0.34 | 4.33 ± 0.10 | 4.22 ± 0.41 | 4.54 ± 0.63  | 4.96 ± 0.29 |
| Stomach                                 | 2.53 ± 0.45 | 1.55 ± 0.07 | 1.55 ± 0.73 | 2.00 ± 0.37  | 3.25 ± 0.54 |
| S. intestine                            | 3.41 ± 0.30 | 3.14 ± 0.30 | 3.43 ± 0.30 | 4.00 ± 0.29  | 5.44 ± 0.87 |
| L. intestine                            | 1.94 ± 0.40 | 2.98 ± 0.13 | 3.27 ± 0.37 | 4.35 ± 0.28  | 7.24 ± 0.51 |
| Kidneys                                 | 13.5 ± 2.19 | 28.5 ± 5.17 | 26.0 ± 2.38 | 21.0 ± 1.61  | 16.2 ± 1.31 |
| Muscle                                  | 0.75 ± 0.12 | 1.48 ± 0.31 | 1.23 ± 0.13 | 1.31 ± 0.30  | 1.28 ± 0.28 |
| Bone                                    | 1.86 ± 0.49 | 2.53 ± 0.17 | 2.03 ± 0.39 | 2.66 ± 0.39  | 2.28 ± 0.19 |
| Skin (ears)                             | 1.80 ± 0.50 | 3.90 ± 0.71 | 3.35 ± 0.30 | 3.55 ± 0.30  | 3.73 ± 0.56 |
| Skin (shoulder)                         | 1.98 ± 0.43 | 5.68 ± 0.65 | 3.93 ± 0.73 | 5.49 ± 0.41  | 5.09 ± 0.88 |
| Tumor                                   | 5.42 ± 0.76 | 9.29 ± 0.43 | 11.6 ± 0.51 | 11.2 ± 0.94  | 11.4 ± 2.92 |
| <b>Tumor-to-tissue ratios (rel. u.)</b> |             |             |             |              |             |
| Tumor/Blood                             | 0.19 ± 0.03 | 0.48 ± 0.03 | 1.00 ± 0.14 | 0.94 ± 0.19  | 1.8 ± 0.5   |
| Tumor/Liver                             | 0.49 ± 0.09 | 0.90 ± 0.05 | 1.29 ± 0.11 | 1.11 ± 0.17  | 1.0 ± 0.3   |
| Tumor/S. I.                             | 1.6 ± 0.3   | 3.0 ± 0.3   | 3.4 ± 0.3   | 2.8 ± 0.3    | 2.1 ± 0.6   |
| Tumor/L. I.                             | 2.8 ± 0.7   | 3.1 ± 0.2   | 3.5 ± 0.4   | 2.6 ± 0.3    | 1.6 ± 0.4   |
| Tumor/Kidney                            | 0.40 ± 0.09 | 0.33 ± 0.06 | 0.45 ± 0.05 | 0.53 ± 0.06  | 0.70 ± 0.19 |
| Tumor/Muscle                            | 7.2 ± 1.5   | 6.3 ± 1.4   | 9.4 ± 1.1   | 9 ± 2        | 9 ± 3       |
| Tumor/Bone                              | 2.9 ± 0.9   | 3.7 ± 0.3   | 5.7 ± 1.1   | 4.2 ± 0.7    | 5.0 ± 1.3   |

*<sup>18</sup>F-AIF-NO2A-cysVar3 in PC3 tumor-bearing male nude mice*

Table S13-7. Tissue uptake (mean %ID ± SD) of <sup>18</sup>F-AIF-NO2A-cysVar3 administered via the lateral tail vein in male, nude mice with shoulder PC3 (prostate cancer) xenografts.

| Tissue       | 1 h (n=3) |        | 4 h (n=4) |        | 6 h (n=4) |        | 8 h (n=4) |        |
|--------------|-----------|--------|-----------|--------|-----------|--------|-----------|--------|
| Blood        | 10.7      | ± 5.84 | 6.88      | ± 1.21 | 6.37      | ± 3.17 | 4.62      | ± 2.24 |
| Heart        | 0.84      | ± 0.22 | 0.61      | ± 0.07 | 0.82      | ± 0.19 | 0.68      | ± 0.09 |
| Lungs        | 2.25      | ± 0.84 | 2.06      | ± 0.77 | 0.77      | ± 0.12 | 0.84      | ± 0.17 |
| Liver        | 9.87      | ± 0.55 | 7.09      | ± 1.13 | 6.97      | ± 1.87 | 6.02      | ± 0.51 |
| Spleen       | 0.24      | ± 0.03 | 0.29      | ± 0.06 | 0.21      | ± 0.05 | 0.35      | ± 0.03 |
| Pancreas     | 0.37      | ± 0.06 | 0.27      | ± 0.03 | 0.19      | ± 0.02 | 0.30      | ± 0.09 |
| Stomach      | 0.46      | ± 0.07 | 0.41      | ± 0.09 | 0.35      | ± 0.04 | 0.42      | ± 0.05 |
| S. intestine | 2.66      | ± 0.10 | 2.47      | ± 0.58 | 1.73      | ± 0.29 | 2.20      | ± 0.22 |
| L. intestine | 1.16      | ± 0.06 | 1.32      | ± 0.27 | 1.15      | ± 0.24 | 1.19      | ± 0.18 |
| Kidneys      | 5.82      | ± 0.64 | 10.6      | ± 1.97 | 12.3      | ± 1.50 | 13.7      | ± 0.50 |
| Muscle       | 0.10      | ± 0.03 | 0.17      | ± 0.02 | 0.12      | ± 0.03 | 0.15      | ± 0.01 |
| Bone         | 0.05      | ± 0.01 | 0.06      | ± 0.03 | 0.10      | ± 0.02 | 0.09      | ± 0.01 |
| Skin         | 0.59      | ± 0.22 | 1.10      | ± 0.26 | 0.29      | ± 0.09 | 0.42      | ± 0.09 |
| Tumor        | 0.96      | ± 0.45 | 1.04      | ± 0.55 | 1.11      | ± 0.53 | 1.79      | ± 0.98 |

Table S13-8. Tissue uptake (mean %ID/g ± SD) of <sup>18</sup>F-AIF-NO2A-cysVar3 administered via the lateral tail vein in male, nude mice with shoulder PC3 (prostate cancer) xenografts.

| Tissue                                  | 1 h (n=3) |        | 4 h (n=4) |        | 6 h (n=4) |        | 8 h (n=4) |        |
|-----------------------------------------|-----------|--------|-----------|--------|-----------|--------|-----------|--------|
| Blood                                   | 16.2      | ± 2.29 | 11.6      | ± 1.83 | 8.66      | ± 0.91 | 9.08      | ± 0.70 |
| Heart                                   | 5.41      | ± 0.99 | 4.04      | ± 0.28 | 3.79      | ± 1.14 | 4.11      | ± 0.14 |
| Lungs                                   | 9.39      | ± 3.35 | 7.69      | ± 1.72 | 3.93      | ± 0.86 | 4.27      | ± 0.45 |
| Liver                                   | 6.03      | ± 0.68 | 5.12      | ± 0.35 | 4.16      | ± 0.40 | 4.19      | ± 0.45 |
| Spleen                                  | 2.23      | ± 0.36 | 2.04      | ± 0.11 | 1.83      | ± 0.20 | 2.47      | ± 0.11 |
| Pancreas                                | 1.78      | ± 0.31 | 1.56      | ± 0.20 | 1.13      | ± 0.15 | 1.37      | ± 0.30 |
| Stomach                                 | 0.65      | ± 0.02 | 0.53      | ± 0.03 | 0.63      | ± 0.10 | 0.44      | ± 0.11 |
| S. intestine                            | 1.28      | ± 0.15 | 1.22      | ± 0.08 | 0.86      | ± 0.14 | 1.38      | ± 0.09 |
| L. intestine                            | 0.58      | ± 0.06 | 0.58      | ± 0.02 | 0.72      | ± 0.19 | 0.74      | ± 0.13 |
| Kidneys                                 | 10.7      | ± 1.10 | 18.2      | ± 3.15 | 19.2      | ± 4.25 | 25.8      | ± 2.51 |
| Muscle                                  | 0.68      | ± 0.13 | 1.03      | ± 0.11 | 0.90      | ± 0.28 | 0.91      | ± 0.23 |
| Bone                                    | 1.21      | ± 0.29 | 1.24      | ± 0.25 | 1.31      | ± 0.09 | 1.28      | ± 0.26 |
| Skin                                    | 1.96      | ± 0.29 | 3.73      | ± 0.08 | 2.32      | ± 0.46 | 2.53      | ± 0.15 |
| Tumor                                   | 3.05      | ± 0.36 | 4.02      | ± 0.35 | 4.19      | ± 0.55 | 3.99      | ± 0.27 |
| <b>Tumor-to-tissue ratios (rel. u.)</b> |           |        |           |        |           |        |           |        |
| Tumor/Blood                             | 0.19      | ± 0.03 | 0.35      | ± 0.06 | 0.48      | ± 0.08 | 0.44      | ± 0.04 |
| Tumor/Liver                             | 0.51      | ± 0.08 | 0.79      | ± 0.09 | 1.01      | ± 0.16 | 0.95      | ± 0.12 |
| Tumor/S. I.                             | 2.4       | ± 0.4  | 3.3       | ± 0.4  | 4.8       | ± 1.0  | 2.9       | ± 0.3  |
| Tumor/L. I.                             | 5.2       | ± 0.8  | 7.0       | ± 0.7  | 5.8       | ± 1.7  | 5.4       | ± 1.0  |
| Tumor/Kidney                            | 0.29      | ± 0.04 | 0.22      | ± 0.04 | 0.22      | ± 0.06 | 0.15      | ± 0.02 |
| Tumor/Muscle                            | 4.5       | ± 1.0  | 3.9       | ± 0.5  | 4.7       | ± 1.6  | 4.4       | ± 1.1  |
| Tumor/Bone                              | 2.5       | ± 0.7  | 3.2       | ± 0.7  | 3.2       | ± 0.5  | 3.1       | ± 0.7  |

*<sup>18</sup>F-AIF-NO2A-cysVar3 in LNCaP tumor-bearing male nude mice*

Table S13-9. Tissue uptake (mean %ID ± SD) of <sup>18</sup>F-AIF-NO2A-cysVar3 administered via the lateral tail vein in male, nude mice with shoulder LNCaP (prostate cancer) xenografts.

| Tissue       | 1 h (n=4)   | 4 h (n=4)   | 6 h (n=4)   | 8 h (n=4)   |
|--------------|-------------|-------------|-------------|-------------|
| Blood        | 17.7 ± 4.60 | 11.4 ± 0.78 | 5.43 ± 1.31 | 5.49 ± 1.77 |
| Heart        | 0.66 ± 0.12 | 0.62 ± 0.10 | 0.73 ± 0.16 | 0.53 ± 0.08 |
| Lungs        | 1.98 ± 0.24 | 1.15 ± 0.14 | 1.33 ± 0.30 | 0.83 ± 0.08 |
| Liver        | 7.33 ± 1.08 | 5.00 ± 0.70 | 5.84 ± 0.23 | 5.42 ± 0.28 |
| Spleen       | 0.30 ± 0.08 | 0.25 ± 0.03 | 0.25 ± 0.02 | 0.27 ± 0.08 |
| Pancreas     | 0.33 ± 0.09 | 0.25 ± 0.05 | 0.23 ± 0.03 | 0.20 ± 0.04 |
| Stomach      | 0.47 ± 0.08 | 0.53 ± 0.32 | 0.47 ± 0.03 | 0.43 ± 0.09 |
| S. intestine | 2.16 ± 0.31 | 1.98 ± 0.36 | 1.72 ± 0.08 | 2.57 ± 0.29 |
| L. intestine | 0.97 ± 0.23 | 1.08 ± 0.18 | 1.19 ± 0.09 | 1.38 ± 0.36 |
| Kidneys      | 5.61 ± 0.62 | 8.87 ± 1.78 | 11.0 ± 1.50 | 13.9 ± 0.79 |
| Muscle       | 0.14 ± 0.03 | 0.16 ± 0.03 | 0.16 ± 0.05 | 0.13 ± 0.02 |
| Bone         | 0.05 ± 0.02 | 0.05 ± 0.03 | 0.08 ± 0.01 | 0.08 ± 0.03 |
| Skin         | 0.71 ± 0.27 | 0.89 ± 0.17 | 0.42 ± 0.08 | 0.37 ± 0.05 |
| Tumor        | 0.39 ± 0.26 | 0.78 ± 0.47 | 3.73 ± 3.95 | 1.81 ± 2.24 |

Table S13-10. Tissue uptake (mean %ID/g ± SD) of <sup>18</sup>F-AIF-NO2A-cysVar3 administered via the lateral tail vein in male, nude mice with shoulder LNCaP (prostate cancer) xenografts.

| Tissue                                  | 1 h (n=4)   | 4 h (n=4)   | 6 h (n=4)   | 8 h (n=4)   |
|-----------------------------------------|-------------|-------------|-------------|-------------|
| Blood                                   | 20.0 ± 2.48 | 12.4 ± 1.74 | 12.1 ± 2.16 | 10.2 ± 2.15 |
| Heart                                   | 5.28 ± 0.92 | 4.41 ± 1.11 | 4.39 ± 0.69 | 3.69 ± 0.28 |
| Lungs                                   | 9.19 ± 1.18 | 5.82 ± 0.49 | 6.48 ± 1.05 | 4.42 ± 0.51 |
| Liver                                   | 5.87 ± 0.39 | 4.62 ± 0.51 | 4.56 ± 0.43 | 4.33 ± 0.49 |
| Spleen                                  | 2.79 ± 0.52 | 1.96 ± 0.14 | 1.93 ± 0.25 | 2.60 ± 0.27 |
| Pancreas                                | 2.01 ± 0.30 | 1.37 ± 0.26 | 1.42 ± 0.24 | 1.42 ± 0.36 |
| Stomach                                 | 1.07 ± 0.21 | 0.70 ± 0.14 | 0.63 ± 0.20 | 0.67 ± 0.13 |
| S. intestine                            | 1.38 ± 0.26 | 1.03 ± 0.05 | 0.97 ± 0.05 | 1.32 ± 0.29 |
| L. intestine                            | 0.47 ± 0.14 | 0.42 ± 0.06 | 0.47 ± 0.03 | 0.68 ± 0.34 |
| Kidneys                                 | 10.7 ± 0.68 | 17.3 ± 1.51 | 23.9 ± 3.74 | 28.6 ± 2.36 |
| Muscle                                  | 0.75 ± 0.09 | 0.93 ± 0.16 | 1.14 ± 0.24 | 1.06 ± 0.33 |
| Bone                                    | 1.23 ± 0.22 | 1.02 ± 0.25 | 1.33 ± 0.14 | 1.24 ± 0.27 |
| Skin                                    | 2.59 ± 0.45 | 3.03 ± 0.42 | 2.91 ± 0.48 | 2.64 ± 0.18 |
| Tumor                                   | 3.04 ± 0.37 | 4.41 ± 0.47 | 4.79 ± 1.08 | 4.57 ± 0.75 |
| <b>Tumor-to-tissue ratios (rel. u.)</b> |             |             |             |             |
| Tumor/Blood                             | 0.15 ± 0.03 | 0.36 ± 0.06 | 0.40 ± 0.11 | 0.45 ± 0.12 |
| Tumor/Liver                             | 0.52 ± 0.07 | 0.95 ± 0.15 | 1.1 ± 0.3   | 1.1 ± 0.2   |
| Tumor/S. I.                             | 2.2 ± 0.5   | 4.3 ± 0.5   | 4.9 ± 1.1   | 3.5 ± 0.9   |
| Tumor/L. I.                             | 7 ± 2       | 10.5 ± 1.8  | 10 ± 2      | 6.7 ± 3.6   |
| Tumor/Kidney                            | 0.28 ± 0.04 | 0.25 ± 0.03 | 0.20 ± 0.06 | 0.16 ± 0.03 |
| Tumor/Muscle                            | 4.1 ± 0.7   | 4.7 ± 0.9   | 4.2 ± 1.3   | 4.3 ± 1.5   |
| Tumor/Bone                              | 2.5 ± 0.5   | 4.3 ± 1.1   | 3.6 ± 0.9   | 3.7 ± 1.0   |

*<sup>18</sup>F-AIF-NO2A-cysVar3 in B16-F10 tumor-bearing female C57Bl/6 mice*

Table S13-11. Tissue uptake (mean %ID ± SD) of <sup>18</sup>F-AIF-NO2A-cysVar3 administered via the lateral tail vein in female, C57Bl/6 mice with orthotopic B16-F10 (melanoma) allografts and one group of female, BALB/c mice with orthotopic B16-F10 (melanoma) allografts at 6 h.

| Tissue          | 1 h (n=4)   | 4 h (n=3)   | 6 h (n=4)   | 8 h (n=3)   | 6 h (n=3)*   |
|-----------------|-------------|-------------|-------------|-------------|--------------|
| Blood           | 12.7 ± 4.93 | 8.16 ± 1.53 | 4.17 ± 0.88 | 4.17 ± 2.37 | 6.25 ± 2.32  |
| Heart           | 0.92 ± 0.13 | 0.58 ± 0.07 | 0.55 ± 0.13 | 0.54 ± 0.08 | 0.67 ± 0.14  |
| Lungs           | 2.70 ± 0.89 | 1.80 ± 0.65 | 2.06 ± 0.64 | 1.00 ± 0.10 | 1.53 ± 0.07  |
| Liver           | 10.2 ± 0.90 | 6.59 ± 1.19 | 5.94 ± 0.45 | 5.88 ± 0.38 | 6.65 ± 0.57  |
| Spleen          | 0.30 ± 0.02 | 0.29 ± 0.07 | 0.28 ± 0.03 | 0.26 ± 0.05 | 0.51 ± 0.08  |
| Stomach         | 0.63 ± 0.12 | 0.51 ± 0.05 | 0.42 ± 0.06 | 0.45 ± 0.08 | 0.62 ± 0.09  |
| S. intestine    | 3.04 ± 0.45 | 2.20 ± 0.39 | 2.40 ± 0.29 | 2.14 ± 0.19 | 2.79 ± 0.23  |
| L. intestine    | 1.04 ± 0.13 | 1.14 ± 0.10 | 1.23 ± 0.05 | 1.28 ± 0.36 | 1.72 ± 0.04  |
| Kidneys         | 6.11 ± 0.70 | 8.10 ± 0.58 | 11.8 ± 0.73 | 13.0 ± 1.76 | 10.20 ± 0.11 |
| Muscle          | 0.14 ± 0.04 | 0.18 ± 0.06 | 0.15 ± 0.05 | 0.17 ± 0.03 | 0.17 ± 0.04  |
| Bone            | 0.07 ± 0.03 | 0.09 ± 0.03 | 0.12 ± 0.04 | 0.14 ± 0.04 | 0.12 ± 0.00  |
| Skin (ears)     | 0.33 ± 0.09 | 0.44 ± 0.15 | 0.34 ± 0.06 | 0.24 ± 0.05 | 0.26 ± 0.04  |
| Skin (shoulder) | 0.38 ± 0.11 | 0.58 ± 0.21 | 0.32 ± 0.17 | 0.20 ± 0.08 | 0.16 ± 0.05  |
| Tumor           | 0.67 ± 0.16 | 1.56 ± 1.89 | 2.29 ± 1.97 | 1.96 ± 2.18 | 0.11 ± 0.07  |

\*BALB/c time point.

Table S13-12. Tissue uptake (mean %ID/g ± SD) of <sup>18</sup>F-AIF-NO2A-cysVar3 administered via the lateral tail vein in female, C57Bl/6 mice with orthotopic B16-F10 (melanoma) allografts and one group of female, BALB/c mice with orthotopic B16-F10 (melanoma) allografts at 6 h.

| Tissue                                  | 1 h (n=5)   | 4 h (n=5)   | 6 h (n=5)   | 8 h (n=5)   | 6 h (n=3)*  |
|-----------------------------------------|-------------|-------------|-------------|-------------|-------------|
| Blood                                   | 29.3 ± 3.06 | 17.2 ± 1.77 | 15.3 ± 0.70 | 14.3 ± 0.80 | 21.1 ± 0.27 |
| Heart                                   | 8.86 ± 1.02 | 5.79 ± 0.63 | 4.86 ± 0.53 | 5.36 ± 0.66 | 6.98 ± 0.81 |
| Lungs                                   | 15.2 ± 1.14 | 10.1 ± 3.12 | 9.70 ± 1.84 | 5.82 ± 0.57 | 8.76 ± 0.47 |
| Liver                                   | 10.1 ± 1.60 | 7.22 ± 0.64 | 7.41 ± 0.20 | 7.01 ± 0.35 | 8.02 ± 0.11 |
| Spleen                                  | 3.79 ± 0.36 | 3.18 ± 0.41 | 3.22 ± 0.19 | 4.00 ± 0.14 | 4.89 ± 0.28 |
| Stomach                                 | 1.90 ± 0.91 | 1.70 ± 0.35 | 1.18 ± 0.27 | 0.82 ± 0.12 | 0.86 ± 0.05 |
| S. intestine                            | 2.77 ± 0.52 | 2.08 ± 0.28 | 1.89 ± 0.16 | 1.93 ± 0.05 | 2.73 ± 0.09 |
| L. intestine                            | 1.48 ± 0.30 | 1.84 ± 0.14 | 1.59 ± 0.12 | 1.72 ± 0.23 | 2.05 ± 0.08 |
| Kidneys                                 | 20.1 ± 3.35 | 28.9 ± 3.19 | 40.7 ± 3.41 | 46.0 ± 2.98 | 34.4 ± 0.71 |
| Muscle                                  | 1.09 ± 0.15 | 1.46 ± 0.14 | 1.51 ± 0.23 | 1.46 ± 0.12 | 1.52 ± 0.16 |
| Bone                                    | 2.33 ± 0.34 | 2.22 ± 0.50 | 2.64 ± 0.45 | 2.42 ± 0.13 | 2.75 ± 0.20 |
| Skin (ears)                             | 2.35 ± 0.34 | 3.61 ± 0.61 | 3.91 ± 0.21 | 2.78 ± 0.17 | 3.00 ± 0.28 |
| Skin (shoulder)                         | 2.77 ± 0.57 | 4.86 ± 0.74 | 4.93 ± 0.68 | 4.77 ± 0.35 | 5.24 ± 0.44 |
| Tumor                                   | 6.12 ± 0.60 | 8.23 ± 0.84 | 8.02 ± 2.00 | 10.5 ± 1.73 | 8.62 ± 1.53 |
| <b>Tumor-to-tissue ratios (rel. u.)</b> |             |             |             |             |             |
| Tumor/Blood                             | 0.21 ± 0.03 | 0.48 ± 0.07 | 0.52 ± 0.13 | 0.73 ± 0.13 | 0.41 ± 0.07 |
| Tumor/Liver                             | 0.61 ± 0.11 | 1.14 ± 0.15 | 1.1 ± 0.3   | 1.5 ± 0.3   | 1.07 ± 0.19 |
| Tumor/S. I.                             | 2.2 ± 0.5   | 4.0 ± 0.7   | 4.2 ± 1.1   | 5.4 ± 0.9   | 3.2 ± 0.6   |
| Tumor/L. I.                             | 4.1 ± 0.9   | 4.5 ± 0.6   | 5.0 ± 1.3   | 6.1 ± 1.3   | 4.2 ± 0.8   |
| Tumor/Kidney                            | 0.30 ± 0.06 | 0.28 ± 0.04 | 0.20 ± 0.05 | 0.23 ± 0.04 | 0.25 ± 0.04 |
| Tumor/Muscle                            | 5.6 ± 0.9   | 5.6 ± 0.8   | 5.3 ± 1.6   | 7.2 ± 1.3   | 5.7 ± 1.2   |
| Tumor/Bone                              | 2.6 ± 0.5   | 3.7 ± 0.9   | 3.0 ± 0.9   | 4.3 ± 0.8   | 3.1 ± 0.6   |

\*BALB/c time point.

*<sup>18</sup>F-AIF-NO2A-cysVar3 in U87MG tumor-bearing male nude mice*

Table S13-13. Tissue uptake (mean %ID ± SD) of <sup>18</sup>F-AIF-NO2A-cysVar3 administered via the lateral tail vein in male, nude mice with U87MG xenografted flank tumors at 6 h.

| Tissue       | 6 h (n=6)     |
|--------------|---------------|
| Blood        | 5.34 ± 2.40   |
| Heart        | 0.73 ± 0.15   |
| Lungs        | 0.91 ± 0.15   |
| Liver        | 5.59 ± 0.72   |
| Spleen       | 0.24 ± 0.06   |
| Pancreas     | 0.21 ± 0.04   |
| Stomach      | 0.46 ± 0.08   |
| S. Intestine | 2.13 ± 0.20   |
| L. Intestine | 1.15 ± 0.18   |
| Kidneys      | 10.1 ± 1.1    |
| Muscle       | 0.15 ± 0.03   |
| Bone         | 0.079 ± 0.014 |
| Skin         | 0.39 ± 0.07   |
| Brain        | 0.151 ± 0.018 |
| U87MG Tumor  | 0.49 ± 0.23   |

\*BALB/c time point.

Table S13-14. Tissue uptake (mean %ID/g ± SD) of <sup>18</sup>F-AIF-NO2A-cysVar3 administered via the lateral tail vein in male, nude mice with U87MG xenografted flank tumors at 6 h.

| Tissue                                  | 6 h (n=6)   |
|-----------------------------------------|-------------|
| Blood                                   | 10.7 ± 0.9  |
| Heart                                   | 4.17 ± 0.42 |
| Lungs                                   | 4.57 ± 0.81 |
| Liver                                   | 4.34 ± 0.88 |
| Spleen                                  | 2.30 ± 0.34 |
| Pancreas                                | 1.30 ± 0.24 |
| Stomach                                 | 0.70 ± 0.24 |
| S. Intestine                            | 1.20 ± 0.21 |
| L. Intestine                            | 0.50 ± 0.09 |
| Kidneys                                 | 17.4 ± 2.5  |
| Muscle                                  | 0.88 ± 0.08 |
| Bone                                    | 1.27 ± 0.11 |
| Skin                                    | 2.43 ± 0.30 |
| Brain                                   | 0.38 ± 0.04 |
| U87MG Tumor                             | 3.97 ± 0.56 |
| <b>Tumor-to-tissue ratios (rel. u.)</b> |             |
| Tumor/Blood                             | 0.37 ± 0.06 |
| Tumor/Liver                             | 0.9 ± 0.2   |
| Tumor/S. I.                             | 3.3 ± 0.7   |
| Tumor/L. I.                             | 7.9 ± 1.8   |
| Tumor/Kidney                            | 0.23 ± 0.05 |
| Tumor/Muscle                            | 4.5 ± 0.8   |
| Tumor/Bone                              | 3.1 ± 0.5   |
| Tumor/Brain                             | 10.5 ± 1.9  |

\*BALB/c time point.

## Supporting Information References

1. Zeglis, B. M.; Sevak, K. K.; Reiner, T.; Mohindra, P.; Carlin, S. D.; Zanzonico, P.; Weissleder, R.; Lewis, J. S., A Pretargeted PET Imaging Strategy Based on Bioorthogonal Diels-Alder Click Chemistry. *J. Nuc. Med.* **2013**, *54* (8), 1389-1396.
2. Dijkgraaf, I.; Franssen, G. M.; McBride, W. J.; D'Souza, C. A.; Laverman, P.; Smith, C. J.; Goldenberg, D. M.; Oyen, W. J. G.; Boerman, O. C., PET of Tumors Expressing Gastrin-Releasing Peptide Receptor with an 18F-Labeled Bombesin Analog. *J. Nuc. Med.* **2012**, *53* (6), 947-952.
3. (a) Viola-Villegas, N. T.; Carlin, S. D.; Ackerstaff, E.; Sevak, K. K.; Divilov, V.; Serganova, I.; Kruchevsky, N.; Anderson, M.; Blasberg, R. G.; Andreev, O. A.; Engelman, D. M.; Koutcher, J. A.; Reshetnyak, Y. K.; Lewis, J. S., Understanding the pharmacological properties of a metabolic PET tracer in prostate cancer. *PNAS* **2014**, *111* (20), 7254-7259; (b) Vavere, A. L.; Biddlecombe, G. B.; Spees, W. M.; Garbow, J. R.; Wijesinghe, D.; Andreev, O. A.; Engelman, D. M.; Reshetnyak, Y. K.; Lewis, J. S., A novel technology for the imaging of acidic prostate tumors by positron emission tomography. *Cancer Res.* **2009**, *69* (10), 4510-4516; (c) Daumar, P.; Wanger-Baumann, C. A.; Pillarsetty, N.; Fabrizio, L.; Carlin, S. D.; Andreev, O. A.; Reshetnyak, Y. K.; Lewis, J. S., Efficient 18F-labeling of large 37-amino-acid pHLIP peptide analogues and their biological evaluation. *Bioconjugate Chem.* **2012**, *23* (8), 1557-1566.
